# Supplementary material for: Theoretical characterization of first and second generation Grubbs catalysts in styrene cross-metathesis reactions: insights from conceptual DFT
Source: Royal Society of Chemistry journal article supplement (doi:10.1039/c5cy00826c), 2015-08-20
Supplement: c5cy00826c1.pdf [file c5cy00826c1.pdf]

## Supporting Information

### **Theoretical Characterization of First and Second Generation Grubbs Catalysts in Styrene Cross-Metathesis Reactions: Insights From Conceptual DFT**

Katherine Paredes-Gil,<sup>a,b\*</sup> Pablo Jaque<sup>a,c</sup>

<sup>a</sup> *Departamento de Ciencias Químicas. Facultad de Ciencias Exactas. Universidad Andres Bello. Av. Republica 275, Santiago, Chile.*

<sup>b</sup> *Universidad de Chile, Facultad de Ciencias, Departamento de Química, Las Palmeras 3425, Santiago, Chile*

<sup>c</sup> *Nucleus Millennium Chemical Processes and Catalysis (CPC), Avenida Vicuña Mackenna 4860, Casilla 306, Correo 22, Santiago, Chile.*

## 2.1 Computed Ru-PR<sub>3</sub> bond strength in 1-2a(b)-PC

The computed ruthenium-phosphane bond strength ( $BE_{PR_3}$ ) in  $[\text{RuCl}_2(=\text{CHPh})(\text{L})(\text{PR}_3)]$  ( $\text{L}=\text{PR}_3$  or  $\text{NCH}$ ) **1-2a(b)-PC** can be done from the ground state total energy of the fully optimized species as :

$$BE_{PR_3} = E(16e - PC) - [E(14e \text{ Inact} - C) + E(PR_3)] \quad (1)$$

The reverse defines the Ru-PR<sub>3</sub> bond dissociation energy ( $BDE$ ). Either  $BDE$  or  $BE_{PR_3}$  can be divided into two hypothetical steps displayed in Scheme 1 of main text, which is also known as distortion/interaction model by Houk<sup>30</sup> or activation strain model by Bickelhaupt.<sup>31</sup>

While the first step involves the distortion (here also called as reorganization) of both isolated fragments on bringing to the complex geometry ( $\Delta E_{reorg}$ ), which is computed as the energy change between the structure of the fragment in the complex and that fully optimized in absence of the other fragment; the second step allows the interaction ( $\Delta E_{int}$ ) between the distorted fragments. This thus leads to write the bond strength in terms of the following contributions:<sup>32</sup>

$$BE_{PR_3} = \Delta E_{reorg}(14e) + \Delta E_{reorg}(PR_3) + \Delta E_{int} = -BDE \quad (2)$$

and the interaction energy as

$$\Delta E_{int} = BE_{PR_3} - \Delta E_{reorg} \quad (3)$$

This analysis has been employed in many types of the chemical processes revealing, for instance, the origins of selectivities in the iridium-catalyzed borylation of aromatic rings

reactions<sup>33</sup> and the difference of the initiation rates among a series of ruthenium-based catalysts encompassing chelated benzylidene classified as Hoveyda-type catalysts.<sup>34</sup> One of current authors has also applied this model to approximate to sulfur-induced copper corrosion through the dibenzyl disulfide adsorption on Cu<sub>7</sub> cluster.<sup>35</sup>

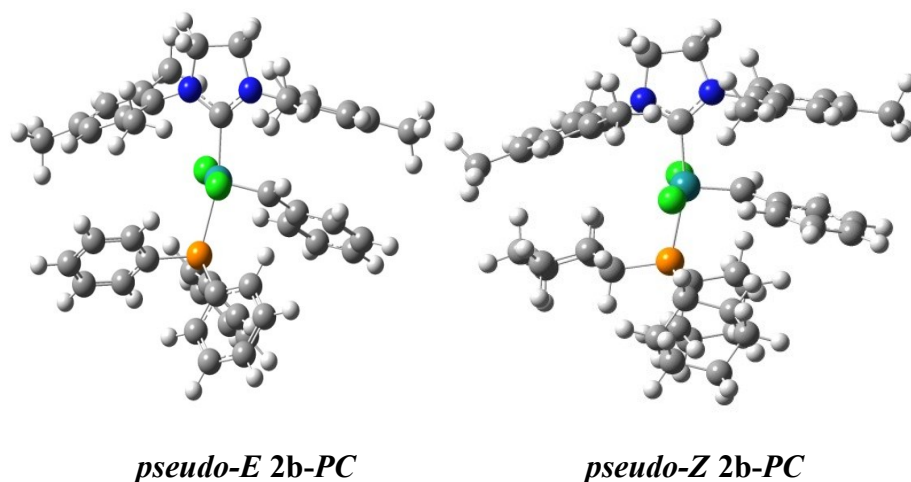

**Figure S1.** Isomers for the 16e- precatalysts **2b-PC**

**Table S1.** Absolute difference energy between the conformers *pseudo-E* and *pseudo-Z* for the precatalysts **2b-PC**. Values are in kcal/mol.

| Functional    | <i>pseudo-E 2b-PC</i> | <i>pseudo-Z 2b-PC</i> | $\Delta E_{E-Z}$ |
|---------------|-----------------------|-----------------------|------------------|
| <b>BP86</b>   | -2044779.2            | -2044784.0            | 4.8              |
| <b>PBE</b>    | -2042763.2            | -2042768.3            | 5.1              |
| <b>PBE0</b>   | -2042983.5            | -2042988.8            | 5.3              |
| <b>TPSS</b>   | -2044926.8            | -2044931.4            | 4.6              |
| <b>M06L</b>   | -2044579.8            | -2044584.0            | 4.2              |
| <b>MPWB1K</b> | -2044108.6            | -2044114.5            | 5.9              |

**Table S2.** Energy contributions in terms of the DFT-Reactivity descriptors.

( $\Delta\Lambda_{reorg}^{14}$ ,  $\Lambda=\mu, \eta, \omega$ ). Values are in kcal/mol.

| $\Delta\Lambda_{reorg}^{14}$ | $\Delta E_{reorg}^{14}$ | $\Delta\mu$ | $\Delta\eta$ | $\Delta\omega$ |
|------------------------------|-------------------------|-------------|--------------|----------------|
| <b>1a</b>                    | 16.4                    | -5.0        | -7.8         | 16.8           |
| <b>2a</b>                    | 13.0                    | -3.7        | -8.7         | 13.6           |
| <b>1b</b>                    | 20.8                    | -8.4        | -13.0        | 27.0           |
| <b>2b</b>                    | 14.4                    | -5.9        | -9.6         | 18.3           |

**Table S3.** Energies contributions in terms of the DFT-Reactivity descriptors.

( $\Delta\Lambda_{int}$ ,  $\Lambda=\mu, \eta, \omega$ ). Values are in kcal/mol.

| $\Delta\Lambda_{int}$ | $\Delta E_{int}$ | $\Delta\mu$ | $\Delta\eta$ | $\Delta\omega$ |
|-----------------------|------------------|-------------|--------------|----------------|
| <b>1a</b>             | -43.3            | 4.2         | -13.3        | 5.6            |
| <b>2a</b>             | -42.9            | 4.5         | -15.1        | 6.3            |
| <b>1b</b>             | -57.1            | -6.4        | -31.7        | 24.8           |
| <b>2b</b>             | -55.7            | -6.1        | -30.6        | 23.0           |

**Table S4.**  $BE_{olefin}$ ,  $\Delta E_{reorg T-T(14)}$ , and  $\Delta E_{int}$  for the ruthenacyclobutanes **1a-RCB**.

Values are in kcal/mol

| Reactants                                                                           |                         | <b>1a-RCB</b>                                      | $BE_{olefin}$ | $\Delta E_{reorg T-T(14)}$ | $\Delta E_{int}$ |
|-------------------------------------------------------------------------------------|-------------------------|----------------------------------------------------|---------------|----------------------------|------------------|
| 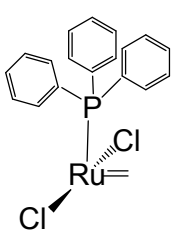   | + ethene                | <b>RCB-0</b>                                       | -11.0         | 9.0                        | -140.1           |
|                                                                                     | + styrene               | <b>RCB-1<math>\alpha</math></b>                    | -10.6         | 12.2                       | -134.3           |
|                                                                                     | + styrene               | <b>RCB-1<math>\beta</math></b>                     | -2.0          | 12.9                       | -134.0           |
|                                                                                     | + <i>cis-stilbene</i>   | <b><i>cis</i>-RCB-2<math>\alpha\beta</math></b>    | -7.6          | 15.5                       | -143.0           |
|                                                                                     | + <i>trans-stilbene</i> | <b><i>trans</i>-RCB-2<math>\alpha\beta</math></b>  | 0.3           | 15.9                       | -130.6           |
|  | + ethene                | <b>RCB-1<math>\alpha</math></b>                    | -5.8          | 11.3                       | -137.0           |
|                                                                                     | + styrene               | <b><i>trans</i>-RCB-2<math>\alpha\alpha</math></b> | -2.9          | 12.7                       | -128.3           |
|                                                                                     | + styrene               | <b><i>cis</i>-RCB-2<math>\alpha\alpha</math></b>   | -1.5          | 16.7                       | -128.8           |
|                                                                                     | + styrene               | <b><i>trans</i>-RCB-2<math>\alpha\beta</math></b>  | 4.4           | 10.2                       | -120.8           |
|                                                                                     | + styrene               | <b><i>cis</i>-RCB-2<math>\alpha\beta</math></b>    | 3.6           | 10.4                       | -120.9           |
|                                                                                     | + <i>trans-stilbene</i> | <b><i>trans,trans</i>-RCB-3</b>                    | 6.1           | 18.2                       | -122.8           |
|                                                                                     | + <i>trans-stilbene</i> | <b><i>trans,cis</i>-RCB-3</b>                      | 9.0           | 13.8                       | -102.2           |
|                                                                                     | + <i>cis-stilbene</i>   | <b><i>cis,cis</i>-RCB-3</b>                        | 8.7           | 16.4                       | -125.6           |

## Coordinate Cartesian

MO6L

1a-PC

|    |             |             |             |
|----|-------------|-------------|-------------|
| Ru | 0.00000000  | 0.00000000  | 0.00000000  |
| Cl | 0.00000000  | 0.00000000  | 2.41495696  |
| Cl | 0.97279794  | 0.00000000  | -2.21986197 |
| P  | -0.04825118 | 2.41611979  | -0.01089821 |
| P  | 0.51349239  | -2.31124994 | 0.11640736  |
| C  | -1.73687087 | -0.31527554 | -0.54472070 |
| H  | -1.85782051 | -1.05066999 | -1.36315665 |
| C  | -5.47552197 | 1.37393912  | 0.59293035  |
| C  | -5.29455441 | 0.84352196  | -0.68651127 |
| C  | -4.07439785 | 0.28110174  | -1.03562093 |
| C  | -2.99411824 | 0.27831428  | -0.12810951 |
| C  | -3.19376534 | 0.81807389  | 1.15748322  |
| C  | -4.42857677 | 1.34517017  | 1.51427322  |
| H  | -6.43503671 | 1.80128526  | 0.87240126  |
| H  | -6.11104715 | 0.85720457  | -1.40341886 |
| H  | -3.93220667 | -0.15409838 | -2.02341725 |
| H  | -2.37140372 | 0.79577131  | 1.86881536  |
| H  | -4.56915892 | 1.75100075  | 2.51273936  |
| C  | -0.58488759 | -3.41412945 | 1.07182535  |
| C  | -0.34948684 | -4.79741615 | 1.08430840  |
| C  | -1.69113300 | -2.90318717 | 1.75718778  |
| C  | -1.19785356 | -5.64970136 | 1.78305700  |
| H  | 0.49809612  | -5.20578288 | 0.53639690  |
| C  | -2.54465820 | -3.76155554 | 2.44892178  |
| H  | -1.87371674 | -1.83222321 | 1.75939285  |
| C  | -2.29865088 | -5.13157316 | 2.46593904  |
| H  | -1.00452261 | -6.71894803 | 1.78827583  |
| H  | -3.40275057 | -3.35360650 | 2.97587079  |
| H  | -2.96443220 | -5.79829223 | 3.00733400  |
| C  | 0.66041857  | -3.21639605 | -1.46446078 |
| C  | 1.88588499  | -3.44272485 | -2.09588457 |
| C  | -0.51955431 | -3.62066912 | -2.10439926 |
| C  | 1.93219913  | -4.06907169 | -3.33888455 |
| H  | 2.81153895  | -3.13445230 | -1.61833721 |
| C  | -0.47090704 | -4.24197812 | -3.34792060 |
| H  | -1.48177865 | -3.46164731 | -1.61958293 |
| C  | 0.75646989  | -4.46712522 | -3.96940023 |

|   |             |             |             |
|---|-------------|-------------|-------------|
| H | 2.89299901  | -4.24134613 | -3.81605310 |
| H | -1.39360413 | -4.55253693 | -3.83083146 |
| H | 0.79444530  | -4.95199616 | -4.94108047 |
| C | 2.15535043  | -2.38868954 | 0.90800234  |
| C | 3.17055998  | -1.58105908 | 0.37026384  |
| C | 2.40065493  | -3.09931464 | 2.08680717  |
| C | 4.41530781  | -1.51356481 | 0.98720440  |
| H | 2.97611885  | -1.00241792 | -0.53358118 |
| C | 3.64745414  | -3.02267283 | 2.70359503  |
| H | 1.61220883  | -3.69735529 | 2.53583049  |
| C | 4.65689170  | -2.23524955 | 2.15503343  |
| H | 5.19347489  | -0.88607299 | 0.56070695  |
| H | 3.82597066  | -3.57513898 | 3.62196166  |
| H | 5.62600282  | -2.17438851 | 2.64273942  |
| C | 1.62304997  | 3.00816929  | 0.45666017  |
| C | 2.72036241  | 2.32837112  | -0.09205451 |
| C | 1.85364494  | 4.09586064  | 1.30670439  |
| C | 4.01891721  | 2.72716982  | 0.20879118  |
| H | 2.55209972  | 1.50045202  | -0.78020927 |
| C | 3.15644809  | 4.48820737  | 1.60870761  |
| H | 1.01628397  | 4.64141365  | 1.73407759  |
| C | 4.24113527  | 3.80437709  | 1.06388073  |
| H | 4.85874034  | 2.19340381  | -0.22807179 |
| H | 3.32183888  | 5.33361455  | 2.27131617  |
| H | 5.25538021  | 4.11137786  | 1.30417567  |
| C | -0.34908753 | 3.21592380  | -1.62899695 |
| C | 0.13724144  | 4.50245560  | -1.89114331 |
| C | -1.12719874 | 2.56908901  | -2.59368015 |
| C | -0.15768753 | 5.13437538  | -3.09569695 |
| H | 0.75085522  | 5.00964078  | -1.14870351 |
| C | -1.42792657 | 3.20625397  | -3.79493606 |
| H | -1.47967902 | 1.55704824  | -2.41069110 |
| C | -0.94453045 | 4.48796301  | -4.04792199 |
| H | 0.22851809  | 6.13119445  | -3.29110336 |
| H | -2.02972277 | 2.69245629  | -4.53952167 |
| H | -1.17356569 | 4.98050710  | -4.98919506 |
| C | -1.19174099 | 3.31383230  | 1.09592390  |
| C | -2.28878181 | 4.01951572  | 0.58423062  |
| C | -1.03682845 | 3.21516129  | 2.48860688  |
| C | -3.20295845 | 4.62469891  | 1.44333667  |
| H | -2.43860932 | 4.09172917  | -0.49031338 |

|              |             |             |             |   |             |             |             |
|--------------|-------------|-------------|-------------|---|-------------|-------------|-------------|
| C            | -1.95314192 | 3.82295035  | 3.34154932  | H | 1.66650200  | 6.15824200  | -0.78705800 |
| H            | -0.20733731 | 2.64666958  | 2.89989062  | C | 1.78031500  | 4.22787300  | -1.76789000 |
| C            | -3.03772254 | 4.53025065  | 2.82271574  | H | 2.80405500  | 4.40520500  | -2.13167200 |
| H            | -4.04990077 | 5.16539521  | 1.02912771  | H | 1.10990200  | 4.50203300  | -2.59206800 |
| H            | -1.81821943 | 3.74015851  | 4.41670445  | C | 1.61839900  | 2.75006000  | -1.43629000 |
| H            | -3.75146375 | 5.00298530  | 3.49229118  | H | 1.80428600  | 2.12007900  | -2.31559600 |
|              |             |             |             | H | 0.56425600  | 2.55754300  | -1.16715800 |
|              |             |             |             | C | 3.26380800  | -0.26471900 | -1.37964000 |
|              |             |             |             | H | 2.49156900  | -0.31948000 | -2.16419900 |
|              |             |             |             | C | 4.45365000  | 0.50395700  | -1.96529300 |
|              |             |             |             | H | 5.25002800  | 0.60680000  | -1.21309600 |
|              |             |             |             | H | 4.16149000  | 1.52102900  | -2.25150300 |
|              |             |             |             | C | 4.99924000  | -0.22108600 | -3.19516100 |
|              |             |             |             | H | 4.22854300  | -0.20745700 | -3.97945700 |
|              |             |             |             | H | 5.86074600  | 0.32420400  | -3.59827500 |
|              |             |             |             | C | 5.37192900  | -1.66678800 | -2.89003200 |
|              |             |             |             | H | 5.73332400  | -2.16754300 | -3.79564400 |
|              |             |             |             | H | 6.20676800  | -1.68185600 | -2.17313500 |
|              |             |             |             | C | 4.18973500  | -2.41899600 | -2.29116700 |
|              |             |             |             | H | 4.46617200  | -3.45133200 | -2.04617500 |
|              |             |             |             | H | 3.37874800  | -2.47993800 | -3.03255700 |
|              |             |             |             | C | 3.67194300  | -1.70403800 | -1.04922200 |
|              |             |             |             | H | 2.83138900  | -2.25266900 | -0.60818400 |
|              |             |             |             | H | 4.46752700  | -1.69113400 | -0.28931300 |
|              |             |             |             | C | -3.29079700 | -0.77430500 | -1.30344200 |
|              |             |             |             | H | -2.87601600 | -0.36147400 | -2.23613700 |
|              |             |             |             | C | -2.88524400 | -2.25009900 | -1.30022200 |
|              |             |             |             | H | -3.22954500 | -2.74519800 | -0.38168700 |
|              |             |             |             | H | -1.79444800 | -2.32245800 | -1.31223100 |
|              |             |             |             | C | -3.47564800 | -2.96395600 | -2.51153100 |
|              |             |             |             | H | -3.02797800 | -2.53938800 | -3.42244100 |
|              |             |             |             | H | -3.19541700 | -4.02381500 | -2.49501100 |
|              |             |             |             | C | -4.99176900 | -2.80844300 | -2.57024100 |
|              |             |             |             | H | -5.39741300 | -3.30567500 | -3.45906600 |
|              |             |             |             | H | -5.44085800 | -3.31445100 | -1.70190800 |
|              |             |             |             | C | -5.39682600 | -1.33894100 | -2.55195800 |
|              |             |             |             | H | -5.03013000 | -0.84961100 | -3.46670400 |
|              |             |             |             | H | -6.48853300 | -1.23777900 | -2.56268500 |
|              |             |             |             | C | -4.81313600 | -0.61916100 | -1.33913400 |
|              |             |             |             | H | -5.24452400 | -1.05017600 | -0.42308000 |
|              |             |             |             | H | -5.10322600 | 0.43999600  | -1.34916600 |
|              |             |             |             | C | -3.25891000 | 0.03293100  | 1.62683400  |
|              |             |             |             | H | -2.50726800 | 0.46520100  | 2.30503100  |
|              |             |             |             | C | -3.40605500 | -1.44300800 | 2.01035900  |
|              |             |             |             | H | -4.18608100 | -1.90752000 | 1.38776600  |
| <b>1b-PC</b> |             |             |             |   |             |             |             |
| Ru           | -0.03367500 | 0.00472300  | 0.07051700  |   |             |             |             |
| Cl           | -0.08469000 | -0.27271700 | -2.36589600 |   |             |             |             |
| Cl           | -0.03636300 | 0.82538700  | 2.39989700  |   |             |             |             |
| P            | 2.32578100  | 0.50439200  | 0.03068000  |   |             |             |             |
| P            | -2.42875100 | 0.24812100  | -0.02331500 |   |             |             |             |
| C            | -0.00834300 | -1.70964900 | 0.75878300  |   |             |             |             |
| H            | -0.25970700 | -1.74463800 | 1.83552700  |   |             |             |             |
| C            | 3.22337000  | 0.22911600  | 1.62871700  |   |             |             |             |
| H            | 2.69176000  | 0.92869100  | 2.29254700  |   |             |             |             |
| C            | 4.70608200  | 0.61331200  | 1.61127000  |   |             |             |             |
| H            | 4.84650200  | 1.61165000  | 1.17542400  |   |             |             |             |
| H            | 5.26323000  | -0.08573100 | 0.96940900  |   |             |             |             |
| C            | 5.28389400  | 0.56454900  | 3.02403500  |   |             |             |             |
| H            | 6.34856300  | 0.82566700  | 3.00569600  |   |             |             |             |
| H            | 4.78600700  | 1.33067000  | 3.63706700  |   |             |             |             |
| C            | 5.07383300  | -0.80317900 | 3.66241900  |   |             |             |             |
| H            | 5.47639400  | -0.81436200 | 4.68192500  |   |             |             |             |
| H            | 5.64421100  | -1.55529100 | 3.09633800  |   |             |             |             |
| C            | 3.59863300  | -1.18788500 | 3.66186600  |   |             |             |             |
| H            | 3.45884800  | -2.18211000 | 4.10182800  |   |             |             |             |
| H            | 3.03700200  | -0.48538100 | 4.29481000  |   |             |             |             |
| C            | 3.01316200  | -1.15132900 | 2.25439500  |   |             |             |             |
| H            | 1.94117900  | -1.37103400 | 2.29027300  |   |             |             |             |
| H            | 3.48349100  | -1.93318200 | 1.64307200  |   |             |             |             |
| C            | 2.50754700  | 2.33420600  | -0.25785200 |   |             |             |             |
| H            | 3.55905600  | 2.50500200  | -0.54012400 |   |             |             |             |
| C            | 2.21681400  | 3.20799500  | 0.96499500  |   |             |             |             |
| H            | 2.87009300  | 2.93766600  | 1.80318100  |   |             |             |             |
| H            | 1.19017100  | 3.02629700  | 1.31412800  |   |             |             |             |
| C            | 2.40379700  | 4.68334100  | 0.62386200  |   |             |             |             |
| H            | 2.19100400  | 5.29873200  | 1.50533900  |   |             |             |             |
| H            | 3.45838900  | 4.86647000  | 0.36627900  |   |             |             |             |
| C            | 1.52043900  | 5.09913900  | -0.54476100 |   |             |             |             |
| H            | 0.46692500  | 4.99292400  | -0.24375200 |   |             |             |             |

|              |             |             |             |    |             |             |             |
|--------------|-------------|-------------|-------------|----|-------------|-------------|-------------|
| H            | -2.47805600 | -1.99237900 | 1.80536700  | C  | -1.60675700 | 0.21698600  | -0.47485300 |
| C            | -3.79897500 | -1.57540200 | 3.47742100  | H  | -1.89548900 | -0.02141300 | -1.51563600 |
| H            | -2.99110600 | -1.16336000 | 4.09941300  | C  | -2.59280100 | 1.07387800  | 0.16198000  |
| H            | -3.89691800 | -2.63278600 | 3.75020200  | Cl | 0.19710100  | -0.33036500 | 2.42968400  |
| C            | -5.09596800 | -0.82666800 | 3.75978400  | Cl | 0.53828000  | -0.69017200 | -2.39894900 |
| H            | -5.36265600 | -0.90147600 | 4.82032100  | C  | -0.40740600 | -2.41221700 | 0.12520400  |
| H            | -5.91494900 | -1.30422000 | 3.20063000  | N  | 0.53764800  | -3.35951900 | 0.32387900  |
| C            | -4.98905700 | 0.63438100  | 3.34026100  | N  | -1.60179600 | -3.04018800 | 0.06042700  |
| H            | -5.93723100 | 1.15677100  | 3.51435000  | C  | -1.50230900 | -4.49228000 | 0.27248000  |
| H            | -4.23729000 | 1.13504900  | 3.96761600  | H  | -1.99682100 | -5.03047700 | -0.54431000 |
| C            | -4.57595800 | 0.77742700  | 1.87613100  | H  | -2.00822400 | -4.76917200 | 1.20691100  |
| H            | -4.47815000 | 1.84192200  | 1.63438900  | C  | 0.00452400  | -4.72586300 | 0.32394800  |
| H            | -5.37223800 | 0.38092900  | 1.22990100  | H  | 0.32897600  | -5.26188800 | 1.22319800  |
| C            | -2.85767400 | 1.99208300  | -0.50376500 | H  | 0.38081200  | -5.27473000 | -0.55010200 |
| H            | -3.94193400 | 2.09477400  | -0.33466700 | C  | -2.88402700 | -2.43270900 | -0.08997500 |
| C            | -2.59420700 | 2.32446200  | -1.97453800 | C  | -3.59241300 | -2.02427400 | 1.04933100  |
| H            | -3.13545800 | 1.63523400  | -2.63292900 | C  | -4.84819900 | -1.44173800 | 0.86440900  |
| H            | -1.52805100 | 2.18136200  | -2.20358200 | H  | -5.39573000 | -1.08897700 | 1.73766600  |
| C            | -3.00832900 | 3.76003800  | -2.28223300 | C  | -5.39855700 | -1.26466700 | -0.40596100 |
| H            | -2.80727600 | 3.98852200  | -3.33514400 | C  | -4.66643500 | -1.69639200 | -1.51670700 |
| H            | -4.09621600 | 3.85904000  | -2.14676600 | H  | -5.07773200 | -1.55627000 | -2.51595300 |
| C            | -2.29505600 | 4.75117200  | -1.37278200 | C  | -3.40942800 | -2.28681000 | -1.38397100 |
| H            | -1.21541500 | 4.70634900  | -1.58205100 | C  | -2.98938600 | -2.15549300 | 2.41083500  |
| H            | -2.60902100 | 5.77784000  | -1.59407100 | H  | -3.66342500 | -1.76658400 | 3.17802600  |
| C            | -2.53250000 | 4.42194800  | 0.09650900  | H  | -2.03918600 | -1.60935100 | 2.47975700  |
| H            | -3.59858900 | 4.56164200  | 0.33320200  | H  | -2.76499700 | -3.19919700 | 2.66271600  |
| H            | -1.98097700 | 5.11489200  | 0.74354300  | C  | -6.74484200 | -0.63021600 | -0.57960600 |
| C            | -2.13489400 | 2.98567300  | 0.41405200  | H  | -6.76058600 | 0.04620400  | -1.44017500 |
| H            | -1.04640000 | 2.86749300  | 0.28130600  | H  | -7.03509300 | -0.05705000 | 0.30504600  |
| H            | -2.31138300 | 2.74953100  | 1.47132900  | H  | -7.52258700 | -1.38301400 | -0.75268600 |
| C            | 0.89846700  | -5.67500100 | -0.53195500 | C  | -2.60630700 | -2.69714500 | -2.57727600 |
| C            | 0.58270300  | -5.40018100 | 0.79808300  | H  | -1.69017600 | -2.09548900 | -2.66517000 |
| C            | 0.28359200  | -4.09818900 | 1.18069800  | H  | -3.18145400 | -2.58148500 | -3.49892300 |
| C            | 0.30197100  | -3.03814000 | 0.24925000  | H  | -2.28089900 | -3.74225000 | -2.51210400 |
| C            | 0.62263300  | -3.33758400 | -1.09062800 | C  | 1.94549500  | -3.11017900 | 0.32046500  |
| C            | 0.91291700  | -4.64047300 | -1.47108400 | C  | 2.60784100  | -2.89202000 | 1.54347500  |
| H            | 1.13290700  | -6.69146900 | -0.83695000 | C  | 3.97204700  | -2.59627900 | 1.50449400  |
| H            | 0.56873800  | -6.19963900 | 1.53400300  | H  | 4.48913100  | -2.39763900 | 2.44241100  |
| H            | 0.03508000  | -3.87511100 | 2.21725400  | C  | 4.68902100  | -2.56441800 | 0.30645400  |
| H            | 0.63441800  | -2.53014300 | -1.81947100 | C  | 4.01668700  | -2.87945900 | -0.87568400 |
| H            | 1.15818800  | -4.85375000 | -2.50840700 | H  | 4.56750100  | -2.89945200 | -1.81573800 |
|              |             |             |             | C  | 2.64929100  | -3.16602100 | -0.89685300 |
|              |             |             |             | C  | 1.92317200  | -3.06067700 | 2.86459800  |
| <b>2a-PC</b> |             |             |             | H  | 0.83608100  | -3.05898500 | 2.77539900  |
| Ru           | 0.06258500  | -0.41418400 | 0.00261200  | H  | 2.18634800  | -2.25491200 | 3.55342400  |



|   |             |             |             |                 |             |             |             |
|---|-------------|-------------|-------------|-----------------|-------------|-------------|-------------|
| H | 2.23665400  | -4.00671800 | 3.32442300  | H               | 5.17642100  | -0.36613300 | -1.70146000 |
| C | 6.14317100  | -2.20186000 | 0.29758300  | C               | -1.64496500 | 4.83207200  | -2.40456000 |
| H | 6.28304500  | -1.13023700 | 0.48347700  | H               | -1.73400400 | 3.29088200  | -3.91149600 |
| H | 6.61138200  | -2.43235200 | -0.66351200 | H               | -1.35925500 | 6.16710600  | -0.73848800 |
| H | 6.69712400  | -2.73147000 | 1.07869600  | H               | 2.51098400  | 4.37309700  | 4.77573500  |
| C | 1.99991200  | -3.59885300 | -2.17509800 | H               | 5.96320100  | 1.57081700  | -3.05077000 |
| H | 2.20652300  | -4.66139000 | -2.36054900 | H               | -2.29544500 | 5.51464400  | -2.94514200 |
| H | 2.39012300  | -3.03256200 | -3.02363100 | P               | 1.06502300  | 1.83216400  | -0.13593500 |
| H | 0.91896600  | -3.44912800 | -2.16861300 |                 |             |             |             |
| C | -2.63128500 | 1.35244900  | 1.54166300  | <b>pseudo-Z</b> |             |             |             |
| H | -1.88478300 | 0.89626400  | 2.18736100  | <b>2b-PC</b>    |             |             |             |
| C | -3.62054800 | 2.17308700  | 2.06701500  | Ru              | 0.05093200  | -0.41062600 | 0.13675600  |
| H | -3.64451100 | 2.36953100  | 3.13608400  | C               | 1.75338700  | 0.26194100  | 0.37692700  |
| C | -4.58107500 | 2.74870200  | 1.23117800  | H               | 2.08928000  | 0.22988200  | 1.43046400  |
| H | -5.34640000 | 3.39886300  | 1.64731900  | C               | 2.76099500  | 0.89184000  | -0.46603000 |
| C | -4.55803300 | 2.48497900  | -0.13797300 | Cl              | -0.28561800 | -0.50787300 | -2.29286400 |
| H | -5.30429800 | 2.92768900  | -0.79287700 | Cl              | -0.18501100 | -0.40117400 | 2.59567700  |
| C | -3.58427500 | 1.64437900  | -0.66281800 | C               | 0.50516000  | -2.41610600 | 0.27495200  |
| H | -3.56811400 | 1.41828700  | -1.72792500 | P               | -1.09361900 | 1.75956600  | 0.14890600  |
| C | 1.56804000  | 2.67174700  | 1.40764600  | N               | -0.43443200 | -3.39404800 | 0.32192300  |
| C | 2.60783300  | 1.78562400  | -1.10987300 | N               | 1.70419400  | -3.00541300 | 0.50187800  |
| C | 0.02222000  | 3.06805500  | -1.00376200 | C               | 1.58768800  | -4.44029300 | 0.80590700  |
| C | 2.89472600  | 3.02368800  | 1.67692400  | H               | 1.78879100  | -4.61542000 | 1.87150200  |
| C | 0.58780000  | 2.92778300  | 2.37684000  | H               | 2.31822700  | -5.01217600 | 0.22460200  |
| C | 3.05084300  | 2.86995900  | -1.87337500 | C               | 0.14602100  | -4.73873000 | 0.42972000  |
| C | 3.38371100  | 0.62256100  | -1.05343900 | H               | 0.05898200  | -5.25949300 | -0.53541500 |
| C | -0.51201300 | 2.70285000  | -2.24859000 | H               | -0.38758600 | -5.32933300 | 1.18123200  |
| C | -0.28443500 | 4.32451200  | -0.47200700 | C               | 2.99932100  | -2.41236300 | 0.42624700  |
| C | 3.23049500  | 3.63274700  | 2.88572200  | C               | 3.58765800  | -2.25059000 | -0.83863200 |
| H | 3.67119800  | 2.82525100  | 0.94268500  | C               | 4.87830700  | -1.72413200 | -0.90281800 |
| C | 0.92276800  | 3.54538900  | 3.57599600  | H               | 5.33255400  | -1.56696600 | -1.88041900 |
| H | -0.44338400 | 2.63995200  | 2.18467300  | C               | 5.58282200  | -1.36244100 | 0.24693300  |
| C | 4.25616700  | 2.79212200  | -2.56816300 | C               | 4.96598000  | -1.54079600 | 1.48813700  |
| H | 2.44855300  | 3.77473000  | -1.92734200 | H               | 5.49449100  | -1.24603500 | 2.39431200  |
| C | 4.58923100  | 0.54786700  | -1.74392900 | C               | 3.67852000  | -2.06816400 | 1.60574900  |
| H | 3.03378500  | -0.23902500 | -0.48253700 | C               | 2.82552500  | -2.58719000 | -2.07974300 |
| C | -1.33122600 | 3.58481000  | -2.94540900 | H               | 3.44175100  | -2.44578100 | -2.97102600 |
| H | -0.28270700 | 1.72017600  | -2.66209600 | H               | 1.93149700  | -1.95552200 | -2.18114900 |
| C | -1.12129400 | 5.19757100  | -1.16796700 | H               | 2.47109200  | -3.62563200 | -2.07206900 |
| H | 0.12519600  | 4.62789900  | 0.48748300  | C               | 6.96654600  | -0.79563400 | 0.15312200  |
| C | 2.24722000  | 3.89773600  | 3.83483200  | H               | 7.16184200  | -0.07972700 | 0.95737600  |
| H | 4.26500200  | 3.90196000  | 3.08120400  | H               | 7.12568100  | -0.28455300 | -0.80071000 |
| H | 0.15041700  | 3.73877100  | 4.31542100  | H               | 7.72721200  | -1.58117000 | 0.23189900  |
| C | 5.02666500  | 1.63250400  | -2.50299800 | C               | 3.02533300  | -2.22644600 | 2.94223700  |
| H | 4.59117900  | 3.63701800  | -3.16374800 | H               | 2.00475900  | -1.82342700 | 2.94042100  |

|   |             |             |             |                       |             |             |             |
|---|-------------|-------------|-------------|-----------------------|-------------|-------------|-------------|
| H | 3.59576700  | -1.71185900 | 3.71932500  | H                     | 0.93371800  | 3.37807100  | -3.42142200 |
| H | 2.95559500  | -3.28046600 | 3.23822800  | C                     | 0.44228100  | 3.60014500  | -1.34061600 |
| C | -1.79837100 | -3.26213400 | -0.08999500 | H                     | 0.32549700  | 4.41964400  | -0.61525100 |
| C | -2.12211700 | -3.37004200 | -1.45251000 | H                     | 1.27784100  | 2.98768000  | -0.98486800 |
| C | -3.47043100 | -3.28559000 | -1.81499400 | C                     | -0.79592300 | 2.81824300  | 1.64491700  |
| H | -3.73046800 | -3.33703700 | -2.87155000 | H                     | -1.18610700 | 2.17146500  | 2.44539400  |
| C | -4.48474800 | -3.16541300 | -0.86660700 | C                     | 0.67471900  | 3.04759500  | 2.00294500  |
| C | -4.12619200 | -3.12406100 | 0.48498200  | H                     | 1.19684200  | 2.08580200  | 2.02131100  |
| H | -4.90606100 | -3.06127600 | 1.24331100  | H                     | 1.16916200  | 3.67163200  | 1.24661800  |
| C | -2.79556000 | -3.16728200 | 0.89904900  | C                     | 0.78614800  | 3.72234500  | 3.36650200  |
| C | -1.08890900 | -3.65445600 | -2.49827900 | H                     | 0.39341600  | 3.03638600  | 4.13132900  |
| H | -0.09222400 | -3.32149100 | -2.20342000 | H                     | 1.83996400  | 3.89396200  | 3.61592400  |
| H | -1.32914200 | -3.14513300 | -3.43383900 | C                     | 0.00597100  | 5.03139300  | 3.40782900  |
| H | -1.04897300 | -4.73161600 | -2.70897800 | H                     | 0.07959200  | 5.49493700  | 4.39850200  |
| C | -5.92596600 | -3.11926000 | -1.27523100 | H                     | 0.45630600  | 5.74300900  | 2.69902700  |
| H | -6.45888900 | -2.29820300 | -0.78301500 | C                     | -1.45434200 | 4.81126000  | 3.03069700  |
| H | -6.44796000 | -4.04219700 | -0.99870600 | H                     | -2.00349100 | 5.76033900  | 3.03324000  |
| H | -6.03392700 | -2.99065400 | -2.35536700 | H                     | -1.93211600 | 4.17336100  | 3.78939400  |
| C | -2.44415400 | -3.15241700 | 2.35242300  | C                     | -1.58135500 | 4.13396600  | 1.66827800  |
| H | -3.34515500 | -3.09892800 | 2.96889000  | H                     | -1.19339100 | 4.80957700  | 0.89137700  |
| H | -1.79635600 | -2.30548800 | 2.60587300  | H                     | -2.63990400 | 3.96579300  | 1.42971300  |
| H | -1.89534400 | -4.05678900 | 2.64100400  | C                     | -2.93293100 | 1.50123400  | 0.20717300  |
| C | 2.72835700  | 0.93178100  | -1.87372100 | H                     | -3.37607000 | 2.48620800  | -0.01023000 |
| H | 1.88977900  | 0.47397600  | -2.39163700 | C                     | -3.39026900 | 0.52754300  | -0.88418400 |
| C | 3.74533600  | 1.55419000  | -2.58459700 | H                     | -2.95179000 | 0.77917000  | -1.85810100 |
| H | 3.70557800  | 1.57333200  | -3.67098400 | H                     | -3.00546700 | -0.47954000 | -0.64961300 |
| C | 4.80795000  | 2.16756400  | -1.91580100 | C                     | -4.91292300 | 0.49683700  | -0.96374800 |
| H | 5.59526200  | 2.66185000  | -2.47941000 | H                     | -5.27039200 | 1.48287000  | -1.29959600 |
| C | 4.85403900  | 2.14540400  | -0.52249700 | H                     | -5.23442600 | -0.22304900 | -1.72720500 |
| H | 5.67890100  | 2.61723900  | 0.00559000  | C                     | -5.54310800 | 0.16124700  | 0.38415000  |
| C | 3.84836700  | 1.50429600  | 0.19149300  | H                     | -6.63676100 | 0.22415300  | 0.32277700  |
| H | 3.88731000  | 1.46549000  | 1.27927500  | H                     | -5.30188000 | -0.87999000 | 0.63440600  |
| C | -0.85176500 | 2.77972200  | -1.39489600 | C                     | -5.01858900 | 1.05486100  | 1.50155200  |
| H | -0.71034400 | 2.00022100  | -2.16006500 | H                     | -5.43369600 | 0.74090100  | 2.46649400  |
| C | -2.01334100 | 3.66633600  | -1.85892100 | H                     | -5.36330900 | 2.08812100  | 1.33975300  |
| H | -2.94064300 | 3.08906200  | -1.94486300 | C                     | -3.49279500 | 1.05470900  | 1.55990000  |
| H | -2.20491100 | 4.45965700  | -1.12060500 | H                     | -3.11193300 | 0.05139100  | 1.80431500  |
| C | -1.69403200 | 4.29298100  | -3.21586400 | H                     | -3.15881400 | 1.71185600  | 2.37058800  |
| H | -1.62257300 | 3.48898000  | -3.96291900 |                       |             |             |             |
| H | -2.52245900 | 4.93728900  | -3.53347300 |                       |             |             |             |
| C | -0.38454600 | 5.07211900  | -3.19584300 | <i>pseudo-E 2b-PC</i> |             |             |             |
| H | -0.16657000 | 5.47941300  | -4.18998000 | Ru                    | 0.01240400  | -0.33005600 | 0.17989500  |
| H | -0.48825200 | 5.93709600  | -2.52316700 | C                     | -0.39977200 | -2.35452200 | 0.29724200  |
| C | 0.76241200  | 4.19657700  | -2.70642000 | N                     | 0.56556500  | -3.30208300 | 0.30804100  |
| H | 1.69747300  | 4.76767500  | -2.65892000 | N                     | -1.56122400 | -2.95462800 | 0.66112500  |
|   |             |             |             | C                     | 0.09519500  | -4.59118700 | 0.83111600  |

|    |             |             |             |   |             |             |             |
|----|-------------|-------------|-------------|---|-------------|-------------|-------------|
| H  | 0.49428400  | -4.74797800 | 1.84284500  | C | 5.98531200  | -2.83207100 | -1.47251500 |
| H  | 0.44454200  | -5.41265000 | 0.19646700  | H | 6.67525200  | -2.63091200 | -0.64850500 |
| C  | -1.41386700 | -4.41058700 | 0.81921100  | H | 6.31752800  | -3.74938800 | -1.97024900 |
| H  | -1.89759900 | -4.74695500 | 1.74140600  | H | 6.09379500  | -2.02176700 | -2.20249700 |
| H  | -1.89860300 | -4.92624500 | -0.02341800 | C | -1.68761500 | 0.37036500  | 0.36275000  |
| Cl | 0.46012200  | -0.40008300 | -2.23853800 | H | -1.99453900 | 0.48461900  | 1.42008800  |
| Cl | 0.04315700  | -0.53585700 | 2.64669100  | C | -2.72600000 | 0.86646000  | -0.53092300 |
| C  | -2.87838900 | -2.43112800 | 0.47916300  | C | -2.73660500 | 0.70965600  | -1.93111400 |
| C  | -3.64983700 | -2.09277200 | 1.60176300  | C | -3.82486800 | 1.51747600  | 0.06959300  |
| C  | -3.39618300 | -2.34739600 | -0.82332600 | C | -3.79555500 | 1.18771200  | -2.68916500 |
| C  | -4.94371300 | -1.61348500 | 1.38515800  | H | -1.90049000 | 0.20545800  | -2.40697100 |
| C  | -4.69987700 | -1.87694100 | -0.98580200 | C | -4.87821200 | 2.00870000  | -0.69274400 |
| C  | -5.48471500 | -1.49313900 | 0.10309900  | H | -3.83645200 | 1.62268600  | 1.15357300  |
| H  | -5.54296400 | -1.32201000 | 2.24713100  | C | -4.86753400 | 1.84174400  | -2.07665800 |
| H  | -5.10034400 | -1.78033000 | -1.99446700 | H | -3.78620600 | 1.05404900  | -3.76821800 |
| C  | 1.92347700  | -3.14236700 | -0.10971600 | H | -5.71229600 | 2.50956800  | -0.20785700 |
| C  | 2.93641000  | -2.88913800 | 0.82642700  | H | -5.69284200 | 2.21692400  | -2.67711600 |
| C  | 2.21723000  | -3.37019700 | -1.46976700 | H | 3.06563400  | 3.63470900  | 3.95574500  |
| C  | 4.24990000  | -2.78577000 | 0.35356700  | C | 2.61970400  | 2.63754400  | 4.09761700  |
| C  | 3.53911100  | -3.24943900 | -1.88832400 | C | 1.29839900  | 2.78808600  | 4.83937500  |
| C  | 4.57096300  | -2.95010600 | -0.99170700 | C | 2.42848300  | 1.96720300  | 2.73988700  |
| H  | 5.04418900  | -2.57149900 | 1.06884600  | H | 3.33780900  | 2.06196000  | 4.69343900  |
| H  | 3.77286800  | -3.40775500 | -2.94053200 | C | 0.32119900  | 3.60853900  | 4.00897000  |
| C  | -2.54826500 | -2.69303400 | -2.00584900 | H | 0.87004300  | 1.79278300  | 5.02402400  |
| H  | -2.10644400 | -3.69331000 | -1.92138000 | H | 1.45800700  | 3.25347400  | 5.81915000  |
| H  | -3.12987400 | -2.65671000 | -2.93051400 | C | 1.38841800  | 2.71060000  | 1.89225000  |
| H  | -1.70530700 | -1.99522100 | -2.10897800 | H | 2.11413500  | 0.92736300  | 2.88300500  |
| C  | -3.10052800 | -2.23174500 | 2.98489000  | H | 3.38895600  | 1.94711100  | 2.20997900  |
| H  | -3.79054300 | -1.81622400 | 3.72332200  | C | 0.07838300  | 2.96523600  | 2.64760200  |
| H  | -2.93558400 | -3.28414800 | 3.24764300  | H | 0.73044500  | 4.62178100  | 3.86860100  |
| H  | -2.13198800 | -1.72816800 | 3.08043200  | H | -0.63282700 | 3.73167700  | 4.53500600  |
| C  | 2.66683700  | -2.79309900 | 2.29549100  | P | 1.07110800  | 1.92367900  | 0.22915000  |
| H  | 1.63119900  | -2.53221800 | 2.52001700  | H | 1.83742800  | 3.68871200  | 1.65084400  |
| H  | 2.90201600  | -3.74456400 | 2.78946800  | H | -0.44689300 | 2.01105100  | 2.78163400  |
| H  | 3.29960900  | -2.03113300 | 2.76131100  | H | -0.58022500 | 3.61119100  | 2.05195600  |
| C  | 1.13871200  | -3.76791800 | -2.42660100 | C | 2.79513300  | 1.92167100  | -0.48096800 |
| H  | 0.42039900  | -2.95423700 | -2.56871100 | C | 0.03014900  | 3.25337800  | -0.57797300 |
| H  | 1.55813100  | -4.02230100 | -3.40290700 | C | 2.90219300  | 2.29990100  | -1.95968400 |
| H  | 0.57823600  | -4.63832200 | -2.06260400 | C | 3.45175200  | 0.55439800  | -0.23246600 |
| C  | -6.87893600 | -0.98334800 | -0.09837400 | H | 3.35009400  | 2.67910300  | 0.10022200  |
| H  | -7.60741900 | -1.80271200 | -0.11123800 | C | -0.35134000 | 2.99629400  | -2.03835900 |
| H  | -7.17633500 | -0.30147700 | 0.70388600  | C | 0.49833600  | 4.70478600  | -0.41677600 |
| H  | -6.97590500 | -0.45009900 | -1.04891400 | H | -0.90501900 | 3.14619200  | -0.00037700 |

|   |             |             |             |   |             |             |             |
|---|-------------|-------------|-------------|---|-------------|-------------|-------------|
| C | 4.34996500  | 2.25383800  | -2.44189100 | H | -4.21376900 | -2.21453200 | -1.29613500 |
| H | 2.28647900  | 1.60901300  | -2.55019500 | H | -1.91142500 | 1.26195300  | -0.23709400 |
| H | 2.50108200  | 3.30650200  | -2.12276800 | H | -3.92584500 | 2.32403600  | 0.67100600  |
| C | 4.90824600  | 0.56548800  | -0.68226600 | C | 2.34470000  | -0.22591600 | 0.75035800  |
| H | 2.90225600  | -0.20863700 | -0.80637300 | C | 3.38523300  | -0.18664700 | -0.18906600 |
| H | 3.37010300  | 0.26254100  | 0.82267700  | C | 2.60324600  | -0.66314700 | 2.05253700  |
| C | -1.47641700 | 3.93457800  | -2.45932800 | C | 4.67194500  | -0.56202500 | 0.18086900  |
| H | 0.51479200  | 3.17112900  | -2.68744400 | H | 3.18037000  | 0.13524100  | -1.20980100 |
| H | -0.62472600 | 1.95145300  | -2.18505900 | C | 3.89417600  | -1.03900000 | 2.41607400  |
| C | -0.59513100 | 5.67016400  | -0.87401600 | H | 1.79611400  | -0.71841000 | 2.77902700  |
| H | 1.40919300  | 4.86284700  | -1.01438200 | C | 4.92822800  | -0.98765000 | 1.48413100  |
| H | 0.76191000  | 4.93668000  | 0.62032900  | H | 5.47405500  | -0.52820100 | -0.55103200 |
| C | 5.00133200  | 0.90480200  | -2.16434300 | H | 4.08960200  | -1.37767100 | 3.42976300  |
| H | 4.92629600  | 3.03861900  | -1.92804700 | H | 5.93295200  | -1.28599200 | 1.77046100  |
| H | 4.39056700  | 2.49267600  | -3.51104200 | C | 0.84353700  | 1.87322300  | -0.49794200 |
| H | 5.46489200  | 1.31604300  | -0.09908900 | C | 1.78538300  | 2.75652300  | 0.04836600  |
| H | 5.37503000  | -0.40207200 | -0.46848000 | C | 0.03814300  | 2.30754100  | -1.55646400 |
| C | -1.05583100 | 5.39028600  | -2.29909600 | C | 1.90407300  | 4.05314300  | -0.44482500 |
| H | -2.36550400 | 3.73251000  | -1.84121900 | H | 2.43353700  | 2.42500600  | 0.85722200  |
| H | -1.77133900 | 3.72610600  | -3.49496100 | C | 0.15727700  | 3.60502300  | -2.04595100 |
| H | -1.45333600 | 5.56722200  | -0.19239100 | H | -0.66115800 | 1.61765200  | -2.02070900 |
| H | -0.24572200 | 6.70477200  | -0.77445700 | C | 1.08857700  | 4.47977800  | -1.49150000 |
| H | 4.48338600  | 0.12229900  | -2.74037600 | H | 2.64041600  | 4.72658600  | -0.01515500 |
| H | 6.04566400  | 0.90629800  | -2.50002300 | H | -0.46697100 | 3.92419700  | -2.87549400 |
| H | -0.22900100 | 5.60221000  | -2.99352400 | H | 1.18836000  | 5.48886700  | -1.88184500 |
| H | -1.87232300 | 6.06783200  | -2.57566800 | C | -0.33575600 | 0.36791200  | 1.69728600  |

**1a-Inact-C**  
PPh<sub>3</sub>Cl<sub>2</sub>Ru=CHPh

|    |             |             |             |
|----|-------------|-------------|-------------|
| Ru | 0.06241700  | -1.41072000 | -1.24848700 |
| Cl | 0.48931600  | -3.17768100 | 0.21540300  |
| Cl | 0.93745600  | -0.41745600 | -3.16161500 |
| P  | 0.66164600  | 0.17690900  | 0.17091800  |
| C  | -1.76040100 | -1.29214400 | -1.33677600 |
| H  | -2.05622600 | -2.15674800 | -1.97124000 |
| C  | -5.21577200 | 0.65469500  | 0.22183900  |
| C  | -5.29249500 | -0.62111700 | -0.33685500 |
| C  | -4.15378800 | -1.22098700 | -0.85717800 |
| C  | -2.90011500 | -0.57178100 | -0.81298300 |
| C  | -2.85033800 | 0.72080900  | -0.25727100 |
| C  | -3.99171600 | 1.32408900  | 0.25062400  |
| H  | -6.10689300 | 1.12900000  | 0.62371800  |
| H  | -6.24309100 | -1.14599300 | -0.37210800 |

|   |             |             |             |
|---|-------------|-------------|-------------|
| H | -4.21376900 | -2.21453200 | -1.29613500 |
| H | -1.91142500 | 1.26195300  | -0.23709400 |
| H | -3.92584500 | 2.32403600  | 0.67100600  |
| C | 2.34470000  | -0.22591600 | 0.75035800  |
| C | 3.38523300  | -0.18664700 | -0.18906600 |
| C | 2.60324600  | -0.66314700 | 2.05253700  |
| C | 4.67194500  | -0.56202500 | 0.18086900  |
| H | 3.18037000  | 0.13524100  | -1.20980100 |
| C | 3.89417600  | -1.03900000 | 2.41607400  |
| H | 1.79611400  | -0.71841000 | 2.77902700  |
| C | 4.92822800  | -0.98765000 | 1.48413100  |
| H | 5.47405500  | -0.52820100 | -0.55103200 |
| H | 4.08960200  | -1.37767100 | 3.42976300  |
| H | 5.93295200  | -1.28599200 | 1.77046100  |
| C | 0.84353700  | 1.87322300  | -0.49794200 |
| C | 1.78538300  | 2.75652300  | 0.04836600  |
| C | 0.03814300  | 2.30754100  | -1.55646400 |
| C | 1.90407300  | 4.05314300  | -0.44482500 |
| H | 2.43353700  | 2.42500600  | 0.85722200  |
| C | 0.15727700  | 3.60502300  | -2.04595100 |
| H | -0.66115800 | 1.61765200  | -2.02070900 |
| C | 1.08857700  | 4.47977800  | -1.49150000 |
| H | 2.64041600  | 4.72658600  | -0.01515500 |
| H | -0.46697100 | 3.92419700  | -2.87549400 |
| H | 1.18836000  | 5.48886700  | -1.88184500 |
| C | -0.33575600 | 0.36791200  | 1.69728600  |
| C | -0.43936900 | 1.60410000  | 2.34909100  |
| C | -1.01987600 | -0.73852500 | 2.21543600  |
| C | -1.20867100 | 1.72565300  | 3.50356900  |
| H | 0.07070400  | 2.47798900  | 1.95147900  |
| C | -1.78112200 | -0.61235400 | 3.37421000  |
| H | -0.95575300 | -1.69744500 | 1.70740800  |
| C | -1.88062400 | 0.61882200  | 4.01857300  |
| H | -1.28541600 | 2.69060700  | 3.99742400  |
| H | -2.30705900 | -1.47879600 | 3.76560400  |
| H | -2.48549600 | 0.71790100  | 4.91582800  |

**1b-Inact-C**  
PCy<sub>3</sub>Cl<sub>2</sub>Ru=CHPh

|    |             |             |             |
|----|-------------|-------------|-------------|
| Ru | 0.00000000  | 0.00000000  | 0.00000000  |
| Cl | 0.00000000  | 0.00000000  | 2.34143617  |
| Cl | 1.21525049  | 0.00000000  | -1.99870591 |
| P  | -0.85184383 | -2.05107803 | -0.15369689 |
| C  | -1.49673117 | 0.96541885  | -0.44654639 |
| H  | -2.48916250 | 0.52969034  | -0.62089690 |



|   |             |             |             |    |             |             |             |
|---|-------------|-------------|-------------|----|-------------|-------------|-------------|
| C | 4.98128835  | 0.03901303  | 0.79861775  | Cl | -3.06233800 | -0.95337200 | -0.58493800 |
| H | 4.74561802  | 2.17299891  | 0.70790988  | P  | 0.11066000  | 0.16452300  | 0.03381400  |
| H | 4.95237418  | -2.08989156 | 1.12984319  | C  | -0.52687300 | -0.58416900 | -2.76039000 |
| C | -1.92941297 | -2.59392784 | 2.54376756  | H  | -0.04107000 | 0.38669100  | -2.92767900 |
| H | -1.24584544 | -2.55863900 | 3.39910083  | C  | 1.93159800  | 0.07614700  | 0.13480000  |
| H | -2.47115777 | -3.54151267 | 2.58417393  | C  | 2.60617300  | 0.42615300  | 1.31019400  |
| H | -1.29602599 | -2.60636967 | 1.64573467  | C  | 2.66741600  | -0.28479400 | -0.99943000 |
| C | -2.64793693 | 2.37935523  | 2.46116529  | C  | 3.99862800  | 0.41781500  | 1.34674200  |
| H | -3.43489154 | 3.13542587  | 2.41470462  | H  | 2.04368500  | 0.70390600  | 2.19863500  |
| H | -2.04657493 | 2.56779120  | 3.35724516  | C  | 4.05776100  | -0.28758800 | -0.96027100 |
| H | -1.97801445 | 2.52934446  | 1.60458759  | H  | 2.14547600  | -0.58602200 | -1.90538000 |
| C | 2.42611990  | 2.57995047  | 2.00671065  | C  | 4.72529100  | 0.06267200  | 0.21255900  |
| H | 1.35202783  | 2.50851724  | 2.18876095  | H  | 4.51475300  | 0.68544100  | 2.26464500  |
| H | 2.90162889  | 2.98815996  | 2.90810211  | H  | 4.62053900  | -0.57772900 | -1.84272600 |
| H | 2.56201203  | 3.31003063  | 1.20566306  | H  | 5.81122600  | 0.05067900  | 0.24434700  |
| C | 2.59120331  | -2.45115219 | 2.41839065  | C  | -0.22129500 | 1.88082000  | -0.50404000 |
| H | 1.60676107  | -2.65452383 | 1.98677659  | C  | -1.53305500 | 2.24243600  | -0.84289200 |
| H | 3.23941350  | -3.29989037 | 2.18905971  | C  | 0.79568900  | 2.84192500  | -0.57435800 |
| H | 2.47169975  | -2.40697050 | 3.50827828  | C  | -1.82245900 | 3.54853000  | -1.22447100 |
| C | -6.56032919 | -0.74218706 | 1.84938952  | H  | -2.32448600 | 1.49642500  | -0.80386500 |
| H | -7.09900546 | -0.95318358 | 2.78024495  | C  | 0.49949000  | 4.14630800  | -0.96611700 |
| H | -7.02788823 | 0.13679326  | 1.39791198  | H  | 1.81965000  | 2.57825600  | -0.32367700 |
| H | -6.72935617 | -1.59586591 | 1.18626701  | C  | -0.80729400 | 4.50228900  | -1.28924100 |
| C | 6.29545393  | 0.02688515  | 0.08011958  | H  | -2.84322100 | 3.81808800  | -1.47996900 |
| H | 6.73644881  | 1.02546297  | 0.02704366  | H  | 1.29593300  | 4.88325000  | -1.02108100 |
| H | 7.01566496  | -0.63825441 | 0.56596135  | H  | -1.03411700 | 5.51976700  | -1.59562500 |
| H | 6.17674737  | -0.33304876 | -0.94808382 | C  | -0.44741700 | 0.05739700  | 1.76407400  |
| C | -1.76947329 | -0.25632737 | -0.43675198 | C  | -0.27780900 | -1.17108500 | 2.41879700  |
| H | -2.55869955 | -0.48006237 | 0.28644794  | C  | -1.06223600 | 1.12056400  | 2.43090200  |
| C | -2.20455017 | -0.23157946 | -1.81577518 | C  | -0.70935800 | -1.32454900 | 3.73114800  |
| C | -1.32750940 | 0.09454570  | -2.87203264 | H  | 0.19262200  | -2.00282100 | 1.89419900  |
| C | -3.54053926 | -0.55426222 | -2.13012143 | C  | -1.49744500 | 0.95782800  | 3.74472200  |
| C | -1.76670247 | 0.08872134  | -4.18597696 | H  | -1.20253600 | 2.07351700  | 1.92659700  |
| H | -0.29546528 | 0.36857729  | -2.65044258 | C  | -1.32200500 | -0.26114800 | 4.39475400  |
| C | -3.97791853 | -0.55967371 | -3.44849635 | H  | -0.57552600 | -2.27820200 | 4.23370200  |
| H | -4.22331087 | -0.80225479 | -1.31895247 | H  | -1.97725300 | 1.78605500  | 4.25839300  |
| C | -3.09307813 | -0.23957929 | -4.47844086 | H  | -1.66676600 | -0.38565200 | 5.41760100  |
| H | -1.07990810 | 0.34392452  | -4.98758842 | H  | -0.86368500 | -1.10937800 | -3.66934400 |
| H | -5.00987222 | -0.81200455 | -3.67694653 |    |             |             |             |
| H | -3.43588600 | -0.24243915 | -5.50959115 |    |             |             |             |

**PPh<sub>3</sub>Cl<sub>2</sub>Ru=CH<sub>2</sub>**

|    |             |             |             |
|----|-------------|-------------|-------------|
| Ru | -0.86673600 | -1.40314000 | -1.18138200 |
| Cl | 0.72307200  | -3.04529000 | -0.80330100 |

**PCy<sub>3</sub>Cl<sub>2</sub>Ru=CH<sub>2</sub>**

|    |             |             |             |
|----|-------------|-------------|-------------|
| Ru | 1.17767900  | -1.09122200 | -1.42309900 |
| C  | -0.14771500 | -1.92763800 | -2.31418300 |
| P  | -0.01692900 | -0.01211300 | 0.12865700  |

|   |             |             |             |                                            |             |             |             |
|---|-------------|-------------|-------------|--------------------------------------------|-------------|-------------|-------------|
| C | -1.14898800 | 1.28730300  | -0.57595700 | H                                          | -1.47268800 | -1.02767200 | 3.36185500  |
| C | -1.78167300 | 2.25822600  | 0.43090200  | H                                          | -3.78431100 | -0.08618700 | 2.91495800  |
| C | -2.49154200 | 3.39523000  | -0.30148600 | H                                          | -3.46218000 | -0.19899900 | 1.19885400  |
| C | -3.54919500 | 2.85858300  | -1.25704700 | H                                          | -3.87210900 | -2.44999700 | 3.19305800  |
| C | -2.93512100 | 1.87948600  | -2.24792600 | H                                          | -4.57772800 | -2.23677900 | 1.60442100  |
| C | -2.20999000 | 0.74165500  | -1.53596100 | H                                          | -2.99298200 | -3.91565400 | 1.11136200  |
| C | 1.06589600  | 0.97328300  | 1.28386000  | H                                          | -1.88899000 | -3.39721800 | 2.36507600  |
| C | 1.73996900  | 2.17399600  | 0.61060500  | H                                          | -1.01925400 | -2.92845900 | 0.03195200  |
| C | 2.49087800  | 3.01779100  | 1.63631800  | H                                          | -2.36954400 | -1.82269800 | -0.19947200 |
| C | 3.51323300  | 2.18704000  | 2.40087200  | Cl                                         | 1.99288400  | -2.71441900 | 0.04450400  |
| C | 2.85475700  | 0.97666500  | 3.04945800  | Cl                                         | 1.67121100  | 0.81774100  | -2.66997000 |
| C | 2.11194400  | 0.13031300  | 2.02055000  | H                                          | -1.22716800 | -1.94709200 | -2.13014200 |
| C | -0.89464800 | -1.17457700 | 1.28281400  | <b>NHC-Cl<sub>2</sub>Ru=CH<sub>2</sub></b> |             |             |             |
| C | -1.72036500 | -0.52163700 | 2.41878500  | Ru                                         | 0.12295300  | -0.05684200 | -1.38958300 |
| C | -3.21846600 | -0.65540800 | 2.16954800  | C                                          | -1.55420700 | -0.08063000 | -2.04844400 |
| C | -3.64510200 | -2.12736400 | 2.17009100  | C                                          | -0.10451700 | -0.03768700 | 0.53121500  |
| C | -2.55183600 | -3.02590700 | 1.57178300  | N                                          | -1.21395700 | 0.08625400  | 1.30414400  |
| C | -1.70754100 | -2.26185200 | 0.56023800  | C                                          | -0.92147200 | -0.04033100 | 2.73655900  |
| H | 0.19502400  | -2.53130600 | -3.17361600 | C                                          | 0.59860700  | 0.02807100  | 2.77836800  |
| H | -0.44019800 | 1.86056400  | -1.19390700 | N                                          | 0.96411100  | -0.15645500 | 1.37282800  |
| H | -1.02827400 | 2.66987300  | 1.11258400  | C                                          | 2.33203300  | -0.05141600 | 0.96468500  |
| H | -2.51648600 | 1.72925900  | 1.05179600  | C                                          | 2.90778500  | 1.22403800  | 0.81404200  |
| H | -2.93654100 | 4.08413600  | 0.42548400  | C                                          | 4.23078600  | 1.29714000  | 0.37852800  |
| H | -1.74874100 | 3.97633400  | -0.86752500 | C                                          | 4.98963000  | 0.15241100  | 0.12604800  |
| H | -4.04568600 | 3.68117300  | -1.78365000 | C                                          | 4.41010300  | -1.09356400 | 0.36885000  |
| H | -4.33103000 | 2.34522800  | -0.67671800 | C                                          | 3.09084800  | -1.22407300 | 0.80637500  |
| H | -3.70065600 | 1.47238000  | -2.91798500 | C                                          | -2.56984500 | 0.05722100  | 0.86889000  |
| H | -2.21398600 | 2.40964800  | -2.88644500 | C                                          | -3.22258800 | 1.27476900  | 0.63589100  |
| H | -1.74230500 | 0.08490800  | -2.27573600 | C                                          | -4.55440900 | 1.23258700  | 0.21957100  |
| H | -2.94260000 | 0.13732500  | -0.97838900 | C                                          | -5.22881500 | 0.02234300  | 0.03318600  |
| H | 0.36513900  | 1.36357500  | 2.04072300  | C                                          | -4.53449400 | -1.17035700 | 0.25824900  |
| H | 1.00991700  | 2.79588700  | 0.07979700  | C                                          | -3.20142900 | -1.17918800 | 0.67235600  |
| H | 2.43725100  | 1.81390300  | -0.15738300 | C                                          | 2.17666400  | 2.48041600  | 1.17992500  |
| H | 2.97499700  | 3.86368100  | 1.13557700  | C                                          | 2.55315400  | -2.57512600 | 1.16347400  |
| H | 1.76918600  | 3.45066900  | 2.34653300  | C                                          | 6.38837900  | 0.26009500  | -0.39835800 |
| H | 4.29060800  | 1.84249400  | 1.70382200  | C                                          | -2.43577900 | -2.45830300 | 0.80816900  |
| H | 4.02193000  | 2.79954200  | 3.15391500  | C                                          | -2.47621100 | 2.56640400  | 0.75401700  |
| H | 2.14544800  | 1.31684700  | 3.81933500  | C                                          | -6.66796200 | 0.00374600  | -0.38258600 |
| H | 3.59917300  | 0.36105400  | 3.56662200  | H                                          | -1.59162500 | -0.10973900 | -3.15339200 |
| H | 1.65706000  | -0.74126800 | 2.50431800  | H                                          | -1.41041500 | 0.76463300  | 3.29565900  |
| H | 2.82819500  | -0.27733100 | 1.29452500  | H                                          | -1.31133400 | -0.99446600 | 3.11744800  |
| H | -0.03598200 | -1.69604100 | 1.72747400  | H                                          | 0.96706200  | 0.99939300  | 3.13739600  |
| H | -1.44505300 | 0.52609100  | 2.57673700  |                                            |             |             |             |

|    |             |             |             |
|----|-------------|-------------|-------------|
| H  | 1.05199900  | -0.75430400 | 3.39649500  |
| H  | 4.67893300  | 2.27902700  | 0.23343200  |
| H  | 5.00199600  | -1.99548100 | 0.21831000  |
| H  | -5.03807800 | -2.12135900 | 0.08986000  |
| H  | -5.07413000 | 2.16930500  | 0.02276900  |
| H  | 1.09100000  | 2.37536000  | 1.12524900  |
| H  | 2.43974100  | 2.78744800  | 2.20083600  |
| H  | 2.44859900  | 3.29993900  | 0.51133300  |
| H  | 2.84077600  | -3.32364700 | 0.42138100  |
| H  | 2.96064700  | -2.89791100 | 2.13014800  |
| H  | 1.46392800  | -2.58436400 | 1.22833300  |
| H  | 6.39365000  | 0.29481200  | -1.49371900 |
| H  | 6.88342600  | 1.17000700  | -0.04788000 |
| H  | 6.99877800  | -0.59724500 | -0.10205500 |
| H  | -1.63166500 | -2.51368000 | 0.06206400  |
| H  | -1.95499000 | -2.55887200 | 1.78772800  |
| H  | -3.08605100 | -3.32443700 | 0.66760300  |
| H  | -3.14250000 | 3.42266200  | 0.62777900  |
| H  | -1.97373300 | 2.66552300  | 1.72272900  |
| H  | -1.68905200 | 2.63146800  | -0.00865900 |
| H  | -7.33095600 | 0.01079100  | 0.49020400  |
| H  | -6.92519300 | 0.87793800  | -0.98644800 |
| H  | -6.91021300 | -0.89201000 | -0.96062900 |
| Cl | 0.75565100  | -2.29734100 | -1.55457300 |
| Cl | 0.74294800  | 2.17112800  | -1.70411400 |
| H  | -2.52535400 | -0.07412100 | -1.54751700 |

**Ethene**

|   |             |             |             |
|---|-------------|-------------|-------------|
| C | -0.66987200 | 0.00000000  | -0.00000300 |
| C | 0.66987200  | 0.00000000  | 0.00000300  |
| H | -1.24278600 | 0.92633800  | 0.00001000  |
| H | -1.24278600 | -0.92633800 | -0.00002300 |
| H | 1.24278600  | -0.92633800 | -0.00001000 |
| H | 1.24278600  | 0.92633800  | 0.00002300  |

**styrene**

|   |             |             |             |
|---|-------------|-------------|-------------|
| C | -1.94515900 | -0.53512500 | -0.00000700 |
| C | -2.96185700 | 0.33685300  | 0.00000700  |
| H | -2.18130500 | -1.60015800 | -0.00002900 |
| H | -2.80926600 | 1.41320200  | 0.00002100  |
| H | -3.99177900 | -0.00270300 | 0.00000300  |
| C | -0.51530900 | -0.22717400 | -0.00000300 |

|   |             |             |             |
|---|-------------|-------------|-------------|
| C | 0.40994000  | -1.28219500 | 0.00000400  |
| C | -0.01740900 | 1.08637600  | -0.00000400 |
| C | 1.78037500  | -1.03981000 | 0.00000200  |
| H | 0.03977300  | -2.30569700 | 0.00000500  |
| C | 1.34941600  | 1.33030300  | -0.00000200 |
| H | -0.70951600 | 1.92465300  | -0.00000200 |
| C | 2.25630700  | 0.26870600  | 0.00000000  |
| H | 2.47632500  | -1.87423500 | 0.00000700  |
| H | 1.71283600  | 2.35439300  | 0.00000200  |
| H | 3.32511600  | 0.46294000  | 0.00000100  |

**Cis-stilbene**

|   |             |             |             |
|---|-------------|-------------|-------------|
| C | -3.91964900 | -0.17739700 | -0.00039000 |
| C | -3.00735100 | 0.87061900  | -0.00022900 |
| C | -1.61928100 | 0.64135700  | 0.00017600  |
| C | -1.17832100 | -0.69540800 | 0.00047800  |
| C | -2.09214600 | -1.74319300 | 0.00030300  |
| C | -3.46459500 | -1.49382700 | -0.00012100 |
| C | -0.75054200 | 1.81807200  | 0.00027400  |
| C | 2.09945000  | 0.34006300  | -1.20467900 |
| C | 1.60128200  | 0.85272400  | 0.00002400  |
| C | 0.59053500  | 1.93209800  | 0.00013600  |
| C | 2.09959300  | 0.33990400  | 1.20460200  |
| H | 1.71682300  | 0.72989100  | 2.14461500  |
| C | 3.05881100  | -0.66984200 | 1.20448700  |
| C | 3.54037300  | -1.17891400 | -0.00022400 |
| C | 3.05864900  | -0.66970900 | -1.20480900 |
| H | -1.30394800 | 2.75811900  | 0.00035100  |
| H | -4.98561900 | 0.03332200  | -0.00069900 |
| H | -3.36566800 | 1.89835200  | -0.00045300 |
| H | -1.72780900 | -2.76705900 | 0.00053300  |
| H | -4.17082200 | -2.31946900 | -0.00021700 |
| H | 0.99068000  | 2.94719600  | 0.00020500  |
| H | 3.42959100  | -1.06068600 | 2.14813800  |
| H | 4.28756600  | -1.96766300 | -0.00031800 |
| H | 3.42927300  | -1.06047400 | -2.14855400 |
| H | -0.11752800 | -0.92103000 | 0.00083000  |
| H | 1.71661600  | 0.73021000  | -2.14459900 |

**PPh<sub>3</sub>**

|   |            |            |            |
|---|------------|------------|------------|
| C | 0.00000000 | 0.00000000 | 0.00000000 |
| C | 0.00000000 | 0.00000000 | 2.84743560 |
| C | 2.46577279 | 0.00000000 | 1.42489706 |



|   |             |             |             |
|---|-------------|-------------|-------------|
| C | -0.86028254 | 1.09942566  | 0.11166568  |
| C | 0.25785268  | -0.52312345 | -1.27598266 |
| C | 0.52977428  | 1.09611843  | 3.53947843  |
| C | -1.23760889 | -0.51802088 | 3.25727672  |
| C | 3.43958081  | -0.51941619 | 2.29082855  |
| C | 2.80056742  | 1.09718989  | 0.62152178  |
| C | -1.44072440 | 1.66321835  | -1.02366524 |
| H | -1.07601319 | 1.52059420  | 1.09086978  |
| C | -0.30926282 | 0.04955287  | -2.41050318 |
| H | 0.91514574  | -1.38519806 | -1.37684961 |
| C | -0.16475013 | 1.66228042  | 4.60747491  |
| H | 1.48870108  | 1.51297740  | 3.24014362  |
| C | -1.93758186 | 0.05654545  | 4.31384414  |
| H | -1.65581100 | -1.37759649 | 2.73614042  |
| C | 4.70522639  | 0.05406842  | 2.36861661  |
| H | 3.19692009  | -1.37946563 | 2.91275146  |
| C | 4.07349374  | 1.66186823  | 0.68834699  |
| H | 2.06157395  | 1.51583196  | -0.05793328 |
| C | -1.16432220 | 1.14433476  | -2.28654581 |
| H | -2.10704721 | 2.51552333  | -0.91916700 |
| H | -0.09197267 | -0.36521860 | -3.39110654 |
| C | -1.40035072 | 1.14857652  | 4.99479758  |
| H | 0.26070979  | 2.51231496  | 5.13444235  |
| H | -2.89827945 | -0.35419905 | 4.61239329  |
| C | 5.02713746  | 1.14602789  | 1.56323691  |
| H | 5.44406090  | -0.35802094 | 3.05062684  |
| H | 4.31750374  | 2.51238549  | 0.05718190  |
| H | -1.61612218 | 1.58705547  | -3.16982755 |
| H | -1.94045939 | 1.59322833  | 5.82601375  |
| H | 6.01773682  | 1.58925719  | 1.61458827  |
| P | 0.82194969  | -0.82338168 | 1.42386742  |

**trans-stilbene**

|   |             |             |             |
|---|-------------|-------------|-------------|
| C | -0.49848300 | 0.45477800  | 0.00005400  |
| C | 0.49848300  | -0.45477800 | 0.00005200  |
| H | -0.23880100 | 1.51415800  | 0.00009800  |
| H | 0.23880100  | -1.51415800 | 0.00006800  |
| C | -1.92904300 | 0.18770300  | 0.00001900  |
| C | -2.81830400 | 1.27624800  | 0.00016900  |
| C | -2.47931000 | -1.10788500 | -0.00018800 |
| C | -4.19548900 | 1.08590500  | 0.00012800  |
| H | -2.41073800 | 2.28542500  | 0.00032400  |
| C | -3.85401200 | -1.29830400 | -0.00023900 |
| H | -1.82252500 | -1.97379400 | -0.00033000 |

|   |             |             |             |
|---|-------------|-------------|-------------|
| C | -4.72136500 | -0.20389100 | -0.00008100 |
| H | -4.85941600 | 1.94585400  | 0.00024900  |
| H | -4.25542400 | -2.30826500 | -0.00041100 |
| H | -5.79656500 | -0.35840500 | -0.00012700 |
| C | 1.92904300  | -0.18770300 | 0.00004300  |
| C | 2.81830400  | -1.27624800 | 0.00019100  |
| C | 2.47931000  | 1.10788500  | -0.00013600 |
| C | 4.19548900  | -1.08590500 | 0.00017600  |
| H | 2.41073800  | -2.28542500 | 0.00032500  |
| C | 3.85401200  | 1.29830400  | -0.00016200 |
| H | 1.82252500  | 1.97379400  | -0.00027600 |
| C | 4.72136500  | 0.20389100  | -0.00000500 |
| H | 4.85941600  | -1.94585400 | 0.00029500  |
| H | 4.25542400  | 2.30826500  | -0.00031100 |
| H | 5.79656500  | 0.35840500  | -0.00003100 |

**PCy<sub>3</sub>**

|   |             |             |             |
|---|-------------|-------------|-------------|
| P | -0.23682600 | -0.07006400 | -1.10208200 |
| C | 0.76218900  | -1.45988400 | -0.34498800 |
| H | 0.06332700  | -2.30811000 | -0.44098600 |
| C | 1.16184800  | -1.37274700 | 1.12912500  |
| H | 0.29632700  | -1.11416700 | 1.75337300  |
| H | 1.89090500  | -0.55857500 | 1.25703600  |
| C | 1.79645200  | -2.67849500 | 1.60457800  |
| H | 2.08716000  | -2.60056300 | 2.65909100  |
| H | 1.04650100  | -3.48204500 | 1.54937900  |
| C | 2.99721200  | -3.05190400 | 0.74281000  |
| H | 3.43272600  | -3.99956100 | 1.08020900  |
| H | 3.78025000  | -2.28929600 | 0.87071100  |
| C | 2.61457500  | -3.13077600 | -0.73111600 |
| H | 3.49125900  | -3.37188300 | -1.34383200 |
| H | 1.90066300  | -3.95579100 | -0.87460200 |
| C | 1.97514300  | -1.83008100 | -1.20880100 |
| H | 1.67504500  | -1.90678500 | -2.26067700 |
| H | 2.72498600  | -1.02840000 | -1.16270900 |
| C | -1.80048000 | -0.12442900 | -0.07505200 |
| H | -1.55868600 | 0.01669000  | 0.99218400  |
| C | -2.51963300 | -1.46954100 | -0.21877600 |
| H | -1.88740500 | -2.28498400 | 0.15281600  |
| H | -2.68814300 | -1.67256500 | -1.28803400 |
| C | -3.85461000 | -1.48612800 | 0.51912800  |
| H | -4.35093800 | -2.45322800 | 0.37573100  |
| H | -3.66929400 | -1.39195200 | 1.59958700  |
| C | -4.75788100 | -0.34543000 | 0.06767000  |

|   |             |             |             |
|---|-------------|-------------|-------------|
| H | -5.01696100 | -0.48760700 | -0.99208100 |
| H | -5.70369600 | -0.35947300 | 0.62153000  |
| C | -4.05681200 | 0.99682000  | 0.23417200  |
| H | -3.87503800 | 1.18045700  | 1.30409300  |
| H | -4.69819300 | 1.81516900  | -0.11384600 |
| C | -2.72687100 | 1.01854400  | -0.51176800 |
| H | -2.23177900 | 1.98860600  | -0.37434500 |
| H | -2.91344800 | 0.92415300  | -1.59264400 |
| C | 0.52420300  | 1.54403000  | -0.51596800 |
| H | -0.00940200 | 2.28758100  | -1.13361600 |
| C | 0.36341100  | 1.99564500  | 0.94103400  |
| H | 0.88266900  | 1.29826600  | 1.61175000  |
| H | -0.69178100 | 1.97919000  | 1.24055200  |
| C | 0.93548600  | 3.40015000  | 1.13552900  |
| H | 0.34528700  | 4.11101200  | 0.53748600  |
| H | 0.82405700  | 3.71178100  | 2.18104500  |
| C | 2.39631700  | 3.47913100  | 0.70514200  |
| H | 2.78060400  | 4.49752400  | 0.83517700  |
| H | 3.00002800  | 2.83507900  | 1.36233900  |
| C | 2.56803000  | 3.01694400  | -0.73676400 |
| H | 3.62500200  | 3.04172600  | -1.02693500 |
| H | 2.04532300  | 3.71461800  | -1.40760300 |
| C | 1.99780400  | 1.61711700  | -0.92946100 |
| H | 2.12103200  | 1.28641200  | -1.96900000 |
| H | 2.57571900  | 0.91388800  | -0.31090200 |

**1a-RCB-0**

|    |             |             |             |
|----|-------------|-------------|-------------|
| Ru | -1.59198400 | 0.00069500  | -0.69352400 |
| Cl | -1.64761000 | -2.41868100 | -0.69774500 |
| Cl | -1.64556800 | 2.42022300  | -0.69714900 |
| C  | -3.24137300 | 0.00151000  | 0.36873400  |
| C  | -3.76487100 | 0.00129500  | -1.10221800 |
| C  | -2.71109400 | 0.00162500  | -2.28944500 |
| H  | -3.44917100 | -0.92548300 | 0.90642500  |
| H  | -4.33427400 | 0.92391700  | -1.22551000 |
| H  | -4.33403700 | -0.92145800 | -1.22557000 |
| H  | -2.73531300 | -0.92527000 | -2.86475300 |
| H  | -2.73483300 | 0.92903400  | -2.86395200 |
| P  | 0.65356900  | -0.00006400 | 0.00085800  |
| C  | 1.71475800  | 1.44499700  | -0.28939500 |
| C  | 2.68261100  | 1.83650100  | 0.64368500  |
| C  | 1.59821000  | 2.13496700  | -1.50006200 |
| C  | 3.52151800  | 2.91177800  | 0.36577500  |
| H  | 2.77062500  | 1.31033300  | 1.59257400  |

|   |             |             |             |
|---|-------------|-------------|-------------|
| C | 2.44761000  | 3.20120700  | -1.77808500 |
| H | 0.81863900  | 1.85748300  | -2.20540300 |
| C | 3.40705400  | 3.59119000  | -0.84627100 |
| H | 4.26328300  | 3.21997400  | 1.09729300  |
| H | 2.34673100  | 3.73876900  | -2.71634900 |
| H | 4.06182800  | 4.43128200  | -1.06032500 |
| C | 0.16011700  | -0.00074600 | 1.74481300  |
| C | -0.12921200 | -1.21605600 | 2.38336000  |
| C | -0.12761100 | 1.21407100  | 2.38499500  |
| C | -0.67167700 | -1.21075700 | 3.66367400  |
| H | 0.03973800  | -2.15533600 | 1.86143900  |
| C | -0.67003600 | 1.20775000  | 3.66531400  |
| H | 0.04257100  | 2.15383700  | 1.86439200  |
| C | -0.93987400 | -0.00175900 | 4.30530800  |
| H | -0.89769300 | -2.15275000 | 4.15501300  |
| H | -0.89472700 | 2.14936100  | 4.15798900  |
| H | -1.37060800 | -0.00214400 | 5.30299900  |
| C | 1.71393100  | -1.44555300 | -0.29041800 |
| C | 1.59664300  | -2.13497900 | -1.50131500 |
| C | 2.68181500  | -1.83799800 | 0.64224800  |
| C | 2.44531200  | -3.20163200 | -1.77998800 |
| H | 0.81701500  | -1.85675000 | -2.20629700 |
| C | 3.51999800  | -2.91367000 | 0.36368000  |
| H | 2.77041300  | -1.31228500 | 1.59133700  |
| C | 3.40478100  | -3.59255200 | -0.84859800 |
| H | 2.34383900  | -3.73876300 | -2.71843500 |
| H | 4.26177500  | -3.22259900 | 1.09487700  |
| H | 4.05898100  | -4.43296000 | -1.06316200 |
| H | -3.44864900 | 0.92881600  | 0.90607400  |

**1b-RCB-0**

|    |             |             |             |
|----|-------------|-------------|-------------|
| Ru | -1.31401200 | -0.59125300 | -1.05426300 |
| Cl | -0.37953200 | -2.82896900 | -1.27510000 |
| Cl | -2.60204200 | 1.45244700  | -0.85889400 |
| P  | 0.55303300  | 0.23641700  | 0.25719300  |
| C  | -1.72607300 | -0.66364800 | -2.95389300 |
| C  | 1.33449600  | 1.90721200  | -0.09052000 |
| C  | 2.03433000  | -0.86313000 | 0.53823300  |
| C  | -0.16324900 | 0.41624600  | 1.97012300  |
| C  | 0.34388200  | 2.93147000  | -0.64748500 |
| C  | 2.60437400  | 1.88948800  | -0.94877900 |
| C  | 2.68009300  | -1.38453900 | -0.75626800 |
| C  | 1.77122500  | -2.03957100 | 1.48795100  |

|   |             |             |             |                |             |             |             |
|---|-------------|-------------|-------------|----------------|-------------|-------------|-------------|
| C | -1.22099000 | -0.67318300 | 2.20929100  | H              | -1.63937000 | 2.77198400  | 4.02734300  |
| C | -0.75254500 | 1.78493000  | 2.32524000  | H              | -0.34933400 | 1.65100200  | 4.43877300  |
| C | 0.96768600  | 4.31978500  | -0.72539500 | H              | -2.53484000 | 0.69598300  | 5.10806300  |
| C | 3.22094000  | 3.28462000  | -1.03408800 | H              | -3.14706000 | 0.88806100  | 3.47029900  |
| C | 2.23569500  | 4.31510100  | -1.56624500 | H              | -3.78677800 | -0.93479300 | -0.24353800 |
| C | 3.97666200  | -2.12855700 | -0.45183300 | H              | -2.92731700 | -2.57074300 | -0.41653300 |
| C | 3.06024100  | -2.80353400 | 1.77770600  | H              | -3.00569100 | -2.35821200 | -2.69785600 |
| C | 3.72528600  | -3.29164700 | 0.49827800  | H              | -3.83785700 | -0.71223000 | -2.53478400 |
| C | -1.68426400 | -0.67554900 | 3.66083600  | H              | -1.97710100 | 0.29027200  | -3.42222000 |
| C | -1.21981600 | 1.79047100  | 3.77983000  |                |             |             |             |
| C | -2.23671200 | 0.68905600  | 4.05374900  |                |             |             |             |
| C | -2.98870200 | -1.34935600 | -2.28078200 |                |             |             |             |
| C | -3.01643300 | -1.53156800 | -0.73471700 |                |             |             |             |
| H | -1.14985800 | -1.36310400 | -3.56163400 |                |             |             |             |
| H | 1.64157000  | 2.22938000  | 0.92047900  |                |             |             |             |
| H | 2.75041300  | -0.18581800 | 1.04143700  |                |             |             |             |
| H | 0.69078500  | 0.23743300  | 2.64570500  |                |             |             |             |
| H | 0.02731200  | 2.60505900  | -1.64833200 |                |             |             |             |
| H | -0.57517500 | 2.95649300  | -0.06064200 |                |             |             |             |
| H | 3.34873000  | 1.19838200  | -0.54168500 |                |             |             |             |
| H | 2.35969900  | 1.53479000  | -1.96092000 |                |             |             |             |
| H | 0.23464800  | 5.02809600  | -1.12619500 |                |             |             |             |
| H | 1.20618600  | 4.66650600  | 0.29229900  |                |             |             |             |
| H | 4.12313500  | 3.24689800  | -1.65504000 |                |             |             |             |
| H | 3.55215100  | 3.58663600  | -0.02917700 |                |             |             |             |
| H | 2.69502100  | 5.30986900  | -1.58781000 |                |             |             |             |
| H | 1.97814200  | 4.06906500  | -2.60649800 |                |             |             |             |
| H | 1.97328400  | -2.06585500 | -1.23949400 |                |             |             |             |
| H | 2.86518900  | -0.57809200 | -1.47022400 |                |             |             |             |
| H | 1.34046700  | -1.69748100 | 2.43543400  |                |             |             |             |
| H | 1.03866800  | -2.71100900 | 1.02096600  |                |             |             |             |
| H | 4.42524400  | -2.48263500 | -1.38689300 |                |             |             |             |
| H | 4.70617600  | -1.43703000 | -0.00049200 |                |             |             |             |
| H | 2.84476300  | -3.64346700 | 2.44797800  |                |             |             |             |
| H | 3.75674400  | -2.14592700 | 2.32058400  |                |             |             |             |
| H | 4.66000300  | -3.81675200 | 0.72635200  |                |             |             |             |
| H | 3.06570100  | -4.01956300 | 0.00508000  |                |             |             |             |
| H | -2.08322400 | -0.44796700 | 1.56184600  |                |             |             |             |
| H | -0.85603200 | -1.66330300 | 1.91021100  |                |             |             |             |
| H | -0.01752200 | 2.58438400  | 2.17547900  |                |             |             |             |
| H | -1.59885400 | 1.99920200  | 1.65827100  |                |             |             |             |
| H | -2.43482000 | -1.45872300 | 3.81429800  |                |             |             |             |
| H | -0.83216100 | -0.93161600 | 4.30925300  |                |             |             |             |
|   |             |             |             | <b>2-RCB-0</b> |             |             |             |
|   |             |             |             | Ru             | -0.01404800 | 1.09579300  | -0.04481800 |
|   |             |             |             | Cl             | 0.64287900  | 1.12783400  | -2.38081500 |
|   |             |             |             | Cl             | -0.67529200 | 1.30202500  | 2.27811300  |
|   |             |             |             | N              | 1.10010300  | -1.68697500 | 0.13216800  |
|   |             |             |             | N              | -1.07509600 | -1.69875900 | -0.15753300 |
|   |             |             |             | C              | 0.00871900  | -0.91995900 | -0.01102900 |
|   |             |             |             | C              | -1.32667700 | 2.49251500  | -0.44903800 |
|   |             |             |             | C              | 0.78418400  | -3.11623400 | -0.01558000 |
|   |             |             |             | C              | -0.74568300 | -3.12326900 | 0.00606100  |
|   |             |             |             | C              | 2.42917100  | -1.15393300 | 0.15364400  |
|   |             |             |             | C              | -2.40910100 | -1.17727000 | -0.11623300 |
|   |             |             |             | C              | 2.95121900  | -0.72107800 | 1.38284100  |
|   |             |             |             | C              | 4.21783400  | -0.13254500 | 1.38120600  |
|   |             |             |             | C              | 4.95890400  | 0.01887500  | 0.20789100  |
|   |             |             |             | C              | 4.42083000  | -0.46635800 | -0.98694000 |
|   |             |             |             | C              | 3.16211800  | -1.06494200 | -1.04177300 |
|   |             |             |             | C              | -3.00859600 | -0.78446900 | -1.32261900 |
|   |             |             |             | C              | -4.27924800 | -0.20682400 | -1.25923700 |
|   |             |             |             | C              | -4.94658100 | -0.02424200 | -0.04721500 |
|   |             |             |             | C              | -4.32720200 | -0.46050100 | 1.12755300  |
|   |             |             |             | C              | -3.06287600 | -1.04795500 | 1.12123500  |
|   |             |             |             | C              | 2.18146100  | -0.88408600 | 2.65508700  |
|   |             |             |             | C              | 6.29654500  | 0.69314400  | 0.22321200  |
|   |             |             |             | C              | 2.63949900  | -1.61707600 | -2.33147300 |
|   |             |             |             | C              | -2.30810800 | -0.96108700 | -2.63269100 |
|   |             |             |             | C              | -6.29834000 | 0.62034900  | 0.00127900  |
|   |             |             |             | C              | -2.44569000 | -1.53920300 | 2.39396400  |
|   |             |             |             | C              | -0.03400700 | 3.32557000  | -0.11865800 |
|   |             |             |             | C              | 1.28089400  | 2.53607700  | 0.23915300  |
|   |             |             |             | H              | -1.62614300 | 2.55818100  | -1.49654300 |
|   |             |             |             | H              | 1.23237300  | -3.69284900 | 0.79975200  |
|   |             |             |             | H              | 1.19198900  | -3.49044300 | -0.96361500 |

|   |             |             |             |
|---|-------------|-------------|-------------|
| H | -1.18746300 | -3.71356500 | -0.80282000 |
| H | -1.15144800 | -3.49068000 | 0.95796200  |
| H | 4.63477700  | 0.21396800  | 2.32569000  |
| H | 4.99288000  | -0.37021800 | -1.90882600 |
| H | -4.75595400 | 0.11222800  | -2.18513000 |
| H | -4.83602600 | -0.32937600 | 2.08168500  |
| H | 1.74204300  | -1.88451300 | 2.73719400  |
| H | 2.82738000  | -0.72483500 | 3.52179100  |
| H | 1.34797400  | -0.17313600 | 2.72246500  |
| H | 6.71309900  | 0.74119600  | 1.23254600  |
| H | 7.01717800  | 0.17676700  | -0.41791800 |
| H | 6.22359000  | 1.72161800  | -0.14825900 |
| H | 2.91801900  | -2.67292000 | -2.44649300 |
| H | 1.55203200  | -1.53654600 | -2.40454000 |
| H | 3.05648300  | -1.07520800 | -3.18296300 |
| H | -3.00425400 | -0.83345400 | -3.46518400 |
| H | -1.49215900 | -0.23721500 | -2.75887900 |
| H | -1.85138700 | -1.95316700 | -2.71823800 |
| H | -6.27708900 | 1.54483400  | 0.58818700  |
| H | -6.66209300 | 0.86993400  | -0.99852000 |
| H | -7.03874100 | -0.03370300 | 0.47360800  |
| H | -2.72775900 | -2.58210500 | 2.58990600  |
| H | -1.35457200 | -1.47458600 | 2.37481200  |
| H | -2.78087800 | -0.94123300 | 3.24384900  |
| H | -0.27589800 | 3.92894900  | 0.75743700  |
| H | 0.19661000  | 3.89277000  | -1.02173300 |
| H | 2.05957800  | 2.62413600  | -0.51987000 |
| H | 1.59531900  | 2.67645200  | 1.27505000  |
| H | -2.12098500 | 2.61335000  | 0.28922900  |

**1a-RCB-1 $\alpha$**

|    |             |             |             |
|----|-------------|-------------|-------------|
| Ru | -0.51815000 | 0.57844900  | 1.28823300  |
| Cl | 0.10808900  | 2.89087200  | 0.76820800  |
| Cl | -0.87918900 | -1.69320900 | 2.01895300  |
| C  | -2.35261400 | 1.24580500  | 0.84242800  |
| C  | -3.32552700 | 0.42497300  | 0.10761000  |
| C  | -3.82500600 | 0.94734400  | -1.09754900 |
| C  | -4.75524000 | 0.24207800  | -1.85378100 |
| C  | -5.20601500 | -1.00204400 | -1.41841800 |
| C  | -4.71493800 | -1.53457500 | -0.22433400 |
| C  | -3.78404600 | -0.83399000 | 0.53062200  |
| C  | -2.31061700 | 1.20976000  | 2.42086500  |
| C  | -0.90413600 | 1.17847900  | 3.11743100  |

|   |             |             |             |
|---|-------------|-------------|-------------|
| H | -2.31204500 | 2.27280800  | 0.47159200  |
| H | -3.47014100 | 1.91971600  | -1.43420800 |
| H | -5.12859500 | 0.66555500  | -2.78280900 |
| H | -5.93670800 | -1.55444200 | -2.00353600 |
| H | -5.06021100 | -2.50588000 | 0.11951700  |
| H | -3.38536100 | -1.27205900 | 1.44102300  |
| H | -2.92993300 | 0.39253400  | 2.79201400  |
| H | -2.70208800 | 2.19788700  | 2.67581000  |
| H | -0.52987400 | 2.16242600  | 3.40379100  |
| H | -0.84690600 | 0.40604600  | 3.88622000  |
| P | 1.27305600  | -0.08678800 | -0.06775200 |
| C | 2.05620600  | -1.71536400 | 0.15054000  |
| C | 2.40547700  | -2.50283700 | -0.95332700 |
| C | 2.39194800  | -2.14360200 | 1.43868100  |
| C | 3.07888700  | -3.70653100 | -0.76709900 |
| H | 2.14049900  | -2.18225300 | -1.95904200 |
| C | 3.07250000  | -3.34368900 | 1.61943700  |
| H | 2.09512200  | -1.55016500 | 2.29950600  |
| C | 3.41544800  | -4.12612400 | 0.51870100  |
| H | 3.33894100  | -4.31654800 | -1.62753100 |
| H | 3.32208100  | -3.67404600 | 2.62355700  |
| H | 3.93889900  | -5.06735100 | 0.66256200  |
| C | 0.15862800  | -0.21593800 | -1.49499500 |
| C | -0.05154400 | 0.89153900  | -2.33139700 |
| C | -0.61679200 | -1.37461400 | -1.66114600 |
| C | -0.99265400 | 0.81596400  | -3.35247800 |
| H | 0.50865600  | 1.80894300  | -2.16387100 |
| C | -1.55598200 | -1.43841100 | -2.68494400 |
| H | -0.49573000 | -2.20984500 | -0.97413300 |
| C | -1.74028700 | -0.34773000 | -3.53261700 |
| H | -1.15176100 | 1.67381200  | -4.00018200 |
| H | -2.16134300 | -2.33257300 | -2.80387300 |
| H | -2.48381400 | -0.39780100 | -4.32389100 |
| C | 2.66058600  | 0.99360900  | -0.53144900 |
| C | 3.20141900  | 1.87850100  | 0.40615500  |
| C | 3.25646300  | 0.86503400  | -1.79182800 |
| C | 4.33004500  | 2.62659100  | 0.08249600  |
| H | 2.71719100  | 2.00249400  | 1.37090400  |
| C | 4.37946700  | 1.62139100  | -2.11284600 |
| H | 2.83771300  | 0.17869300  | -2.52555800 |
| C | 4.91782200  | 2.50081900  | -1.17440600 |
| H | 4.74191800  | 3.31886800  | 0.81085100  |
| H | 4.83352600  | 1.52299200  | -3.09480700 |
| H | 5.79443800  | 3.09133300  | -1.42572900 |

**1b-RCB-1 $\alpha$** 

|    |             |             |             |                                   |             |             |             |
|----|-------------|-------------|-------------|-----------------------------------|-------------|-------------|-------------|
| Ru | 0.00000000  | 0.00000000  | 0.00000000  | H                                 | -3.46763248 | -0.94268907 | -4.17387916 |
| Cl | 0.00000000  | 0.00000000  | 2.44157020  | H                                 | -3.45919926 | -2.66263708 | -3.80205846 |
| Cl | 0.57527048  | 0.00000000  | -2.37855722 | H                                 | -5.92492502 | -2.41090238 | -0.95219822 |
| P  | -0.95753643 | -2.21569952 | -0.06541458 | H                                 | -4.91376900 | -3.53584454 | -1.84600047 |
| C  | -0.84475074 | 1.77324926  | 0.19986525  | H                                 | -5.71789687 | -1.73707853 | -3.35694733 |
| C  | -1.86182626 | 2.11942423  | -0.80637269 | H                                 | -5.02796757 | -0.51145239 | -2.29740212 |
| C  | -3.20215490 | 2.03101413  | -0.38730107 | H                                 | -1.83207632 | -1.55777938 | 2.90326782  |
| C  | -4.24711870 | 2.23261168  | -1.28147986 | H                                 | -3.22394463 | -1.89472616 | 1.90629900  |
| C  | -3.97308616 | 2.54534361  | -2.61217063 | H                                 | 0.42713107  | -4.23344803 | 1.67640906  |
| C  | -2.64773237 | 2.66046076  | -3.03403393 | H                                 | 0.28256028  | -2.81984832 | 2.72209270  |
| C  | -1.60117517 | 2.44769624  | -2.14506826 | H                                 | -3.62052251 | -2.76889488 | 4.16836541  |
| C  | -2.46442199 | -2.38938089 | -1.17850799 | H                                 | -3.49711726 | -4.12711082 | 3.05692921  |
| C  | -1.45296058 | -3.12732009 | 1.48842384  | H                                 | 0.08927490  | -4.94953902 | 4.00448735  |
| C  | 0.31648739  | -3.36177507 | -0.79792467 | H                                 | -1.23807856 | -5.47162681 | 2.97809594  |
| C  | -2.39726596 | -1.44201740 | -2.37900505 | H                                 | -2.14279379 | -4.57946780 | 5.09592674  |
| C  | -3.82602439 | -2.27031238 | -0.48584648 | H                                 | -1.26910302 | -3.06826624 | 4.86641193  |
| C  | -2.39647271 | -2.36963645 | 2.43663158  | H                                 | 1.94541733  | -1.96012268 | -0.83528556 |
| C  | -0.27198037 | -3.67120762 | 2.30426806  | H                                 | 1.76374553  | -2.74950913 | 0.72722590  |
| C  | 1.72347467  | -2.92534763 | -0.35471932 | H                                 | -0.70365829 | -3.86940833 | -2.65882873 |
| C  | 0.28778127  | -3.54806616 | -2.31804276 | H                                 | 0.50028491  | -2.58766593 | -2.80260069 |
| C  | -3.54957877 | -1.66206475 | -3.35091143 | H                                 | 3.76515461  | -3.62184772 | -0.45731433 |
| C  | -4.96640803 | -2.50053576 | -1.47638879 | H                                 | 2.57455624  | -4.90002531 | -0.25484953 |
| C  | -4.89755474 | -1.54324224 | -2.65629113 | H                                 | 1.30573986  | -4.70801631 | -3.82587373 |
| C  | -2.92221694 | -3.30789237 | 3.51799511  | H                                 | 1.07673526  | -5.55696972 | -2.30373017 |
| C  | -0.76618939 | -4.58316726 | 3.42530761  | H                                 | 3.46425144  | -4.93931224 | -2.57659479 |
| C  | -1.77181746 | -3.88658053 | 4.33191650  | H                                 | 3.02319219  | -3.24912824 | -2.79279363 |
| C  | 2.76976213  | -3.95011310 | -0.77655415 | H                                 | 2.41211716  | 0.83523088  | -0.61911714 |
| C  | 1.33385815  | -4.57865956 | -2.73800298 | H                                 | 2.17314458  | 0.91504138  | 1.21683898  |
| C  | 2.73236016  | -4.17847414 | -2.28252027 | H                                 | 0.89121955  | 2.76291893  | 0.85788328  |
| C  | 0.68911574  | 2.09672737  | 0.01505776  | H                                 | 0.86022128  | 2.54870936  | -0.96281321 |
| C  | 1.72534794  | 0.93277308  | 0.22316909  |                                   |             |             |             |
| H  | -1.16593526 | 1.96748669  | 1.22732284  |                                   |             |             |             |
| H  | -3.41030217 | 1.78323097  | 0.65265342  | <b>2-RCB-1<math>\alpha</math></b> |             |             |             |
| H  | -5.27555186 | 2.14606175  | -0.93985796 | Ru                                | -0.31399200 | -0.80219000 | -0.28626300 |
| H  | -4.78637142 | 2.70087912  | -3.31607873 | Cl                                | -0.85785300 | -0.10999800 | -2.56145700 |
| H  | -2.42657259 | 2.90572565  | -4.06922726 | Cl                                | -0.07059900 | -1.63242500 | 1.98345300  |
| H  | -0.57721930 | 2.49306633  | -2.50124241 | N                                 | -1.98274800 | 1.45909400  | 0.80583400  |
| H  | -2.38122726 | -3.42909005 | -1.54072981 | N                                 | 0.12810500  | 2.01889900  | 0.59323700  |
| H  | -2.00040552 | -3.99729023 | 1.07564517  | C                                 | -0.76893600 | 1.04057700  | 0.40169600  |
| H  | 0.09284529  | -4.34259084 | -0.34372709 | C                                 | 1.22937700  | -1.72438700 | -1.15723900 |
| H  | -2.42060606 | -0.40446198 | -2.01108563 | C                                 | 2.57150100  | -1.89177300 | -0.57415300 |
| H  | -1.44227418 | -1.53461968 | -2.89814071 | C                                 | 3.65320000  | -1.42413200 | -1.34108000 |
| H  | -3.91308611 | -2.99158067 | 0.33263118  | C                                 | 4.96295000  | -1.55976300 | -0.89557000 |
| H  | -3.92806908 | -1.26750974 | -0.04443979 | C                                 | 5.22084900  | -2.15601000 | 0.33614500  |
|    |             |             |             | C                                 | 4.15689800  | -2.62334900 | 1.10993400  |

|   |             |             |             |    |             |             |             |
|---|-------------|-------------|-------------|----|-------------|-------------|-------------|
| C | 2.84744000  | -2.49789300 | 0.66256100  | H  | -3.43550900 | 1.71105400  | -2.78309100 |
| C | -1.95888600 | 2.88132000  | 1.18552200  | H  | 1.69100600  | 3.28648600  | -2.76342600 |
| C | -0.46318200 | 3.16676600  | 1.29787300  | H  | 0.47804200  | 2.06313900  | -2.34063800 |
| C | -3.19588800 | 0.77140700  | 0.46650700  | H  | 0.45684200  | 3.63138800  | -1.54225700 |
| C | 1.53637400  | 1.89217900  | 0.36210000  | H  | 6.25228800  | 0.96746300  | 0.29358400  |
| C | -3.77315300 | -0.08557400 | 1.41748600  | H  | 5.98308000  | 1.40834400  | -1.40122300 |
| C | -4.90621200 | -0.80794000 | 1.03992900  | H  | 6.21741900  | 2.66356200  | -0.19150000 |
| C | -5.47345300 | -0.68128700 | -0.23040100 | H  | 2.05138500  | 1.86731800  | 3.44543000  |
| C | -4.90831700 | 0.23208000  | -1.12212900 | H  | 0.79907100  | 0.81899100  | 2.74207000  |
| C | -3.77745000 | 0.98275700  | -0.79453200 | H  | 2.37699700  | 0.16317100  | 3.12266000  |
| C | 2.03757500  | 2.31921700  | -0.88163000 | H  | 0.48686700  | -3.57468600 | -0.24118900 |
| C | 3.41113700  | 2.22526600  | -1.09726500 | H  | 0.09204600  | -3.29226100 | -2.00185500 |
| C | 4.28007800  | 1.73209300  | -0.11885900 | H  | -1.99274900 | -2.40480100 | -1.53477000 |
| C | 3.74529300  | 1.32509900  | 1.10197900  | H  | -1.72600000 | -2.94159500 | 0.21586100  |
| C | 2.37697500  | 1.40973900  | 1.37743900  |    |             |             |             |
| C | -3.20383500 | -0.21277100 | 2.79404700  |    |             |             |             |
| C | -6.65728300 | -1.50933500 | -0.62749200 | Ru | -0.75007500 | -0.31659500 | -0.35331700 |
| C | -3.25963700 | 2.01444400  | -1.74899700 | Cl | -1.10536400 | 2.09011800  | -0.33303600 |
| C | 1.12258400  | 2.85445600  | -1.93649000 | Cl | -0.36032900 | -2.70095600 | -0.37175600 |
| C | 5.75658600  | 1.68434900  | -0.36674800 | C  | -2.17190500 | -0.56267000 | -1.67296700 |
| C | 1.86587500  | 1.04966100  | 2.73728000  | C  | -2.92046700 | -0.91859700 | -0.30590800 |
| C | 0.13903300  | -2.86797600 | -0.99615000 | C  | -2.15169100 | -0.54173500 | 1.00921700  |
| C | -1.32917300 | -2.44155200 | -0.66956800 | H  | -2.56421600 | 0.33993700  | -2.14710900 |
| H | 1.28692400  | -1.40126600 | -2.20043200 | H  | -2.97988900 | -2.01078800 | -0.30449600 |
| H | 3.45146300  | -0.95248700 | -2.30126700 | H  | -2.50794500 | 0.37560700  | 1.48422100  |
| H | 5.78320600  | -1.19771300 | -1.51020200 | H  | -2.01420300 | -1.39831000 | 1.67280600  |
| H | 6.24327100  | -2.26027700 | 0.69101600  | H  | -2.09668700 | -1.44338100 | -2.31368500 |
| H | 4.34944200  | -3.09194200 | 2.07164000  | C  | -4.29496600 | -0.28016300 | -0.31447300 |
| H | 2.02722800  | -2.84484700 | 1.28386100  | C  | -5.40335100 | -1.12956600 | -0.30737500 |
| H | -2.50150900 | 3.03823000  | 2.12243100  | C  | -4.48856000 | 1.10351700  | -0.32622000 |
| H | -2.44436600 | 3.47982500  | 0.40243500  | C  | -6.69447300 | -0.60267200 | -0.31172800 |
| H | -0.15902000 | 4.10543800  | 0.82408900  | H  | -5.25470000 | -2.20747400 | -0.29806200 |
| H | -0.11400900 | 3.17923500  | 2.33954600  | C  | -5.77924800 | 1.62386600  | -0.33157400 |
| H | -5.35947400 | -1.48429800 | 1.76332700  | H  | -3.62442800 | 1.76451600  | -0.33198200 |
| H | -5.35645300 | 0.36671300  | -2.10550400 | C  | -6.88628100 | 0.77578600  | -0.32425900 |
| H | 3.81400200  | 2.54919800  | -2.05628300 | H  | -7.54813400 | -1.27516600 | -0.30573500 |
| H | 4.40817400  | 0.92604700  | 1.86890000  | H  | -5.91925700 | 2.70150100  | -0.34174700 |
| H | -3.00636100 | 0.76818600  | 3.24023800  | H  | -7.89189800 | 1.18735400  | -0.32867000 |
| H | -3.89218900 | -0.75058700 | 3.45036800  | P  | 1.54884500  | 0.10150200  | -0.09045900 |
| H | -2.24763400 | -0.74856500 | 2.78540500  | C  | 2.34155100  | 1.69810600  | -0.44625800 |
| H | -7.28591600 | -1.75487800 | 0.23286000  | C  | 3.38954000  | 2.15207400  | 0.36366700  |
| H | -7.27800800 | -0.99923400 | -1.36916300 | C  | 1.96845400  | 2.43320900  | -1.57577300 |
| H | -6.34082600 | -2.45909700 | -1.07406500 | C  | 4.05750400  | 3.33013000  | 0.04593100  |
| H | -3.77271100 | 2.97307700  | -1.59418000 | H  | 3.67703500  | 1.59107800  | 1.25065200  |
| H | -2.18412100 | 2.17725400  | -1.64969800 |    |             |             |             |

**1a-RCB-1 $\beta$**

|   |            |             |             |
|---|------------|-------------|-------------|
| C | 2.64565400 | 3.60733900  | -1.89335000 |
| H | 1.12908300 | 2.10167900  | -2.18114600 |
| C | 3.68797400 | 4.05639900  | -1.08504200 |
| H | 4.86508000 | 3.68117600  | 0.68219600  |
| H | 2.34715100 | 4.17916200  | -2.76701100 |
| H | 4.20934700 | 4.97686100  | -1.33309500 |
| C | 1.38060900 | -0.02969800 | 1.71088800  |
| C | 1.43785900 | -1.28507100 | 2.33421600  |
| C | 1.01131400 | 1.10474700  | 2.44968500  |
| C | 1.16201000 | -1.39262500 | 3.69321400  |
| H | 1.66374300 | -2.17139400 | 1.74582400  |
| C | 0.73520500 | 0.98522400  | 3.80708100  |
| H | 0.91535200 | 2.06676700  | 1.95152700  |
| C | 0.81346200 | -0.26061900 | 4.42945000  |
| H | 1.20654600 | -2.36534100 | 4.17443400  |
| H | 0.44715000 | 1.86417000  | 4.37613800  |
| H | 0.59058700 | -0.35095200 | 5.48916900  |
| C | 2.75150500 | -1.14283300 | -0.64458100 |
| C | 2.51974000 | -1.82174600 | -1.84464100 |
| C | 3.92882200 | -1.38392200 | 0.07332500  |
| C | 3.46006400 | -2.72724300 | -2.32606600 |
| H | 1.58835900 | -1.66403300 | -2.38296800 |
| C | 4.86134600 | -2.29899700 | -0.40656600 |
| H | 4.10974600 | -0.86714000 | 1.01421700  |
| C | 4.62890100 | -2.96770100 | -1.60774300 |
| H | 3.26987200 | -3.25794200 | -3.25432900 |
| H | 5.76844700 | -2.49096500 | 0.15966700  |
| H | 5.35783400 | -3.68224900 | -1.97942900 |

**1b-RCB-1 $\beta$**

|    |             |             |             |
|----|-------------|-------------|-------------|
| Ru | -0.84429800 | -0.39370200 | -0.24423800 |
| Cl | -1.56980200 | 1.84401400  | 0.28758200  |
| Cl | -0.36175900 | -2.76459800 | -0.56455000 |
| C  | -2.01761000 | -0.52328300 | -1.80697000 |
| C  | -2.95776900 | -1.06135300 | -0.66893000 |
| C  | -2.36891900 | -1.04969400 | 0.81020200  |
| H  | -2.34955100 | 0.42430400  | -2.23613800 |
| H  | -3.01851300 | -2.13540200 | -0.87625700 |
| H  | -2.84677300 | -0.30594200 | 1.45223000  |
| H  | -2.28193500 | -2.05796200 | 1.21971400  |
| H  | -1.76773500 | -1.30082800 | -2.53070500 |
| C  | -4.32618400 | -0.41540900 | -0.62736800 |
| C  | -5.38813300 | -1.22572400 | -0.20750800 |

|   |             |             |             |
|---|-------------|-------------|-------------|
| C | -4.58610400 | 0.91182800  | -0.97530000 |
| C | -6.68755900 | -0.72930100 | -0.15833600 |
| H | -5.18995300 | -2.25913400 | 0.07155000  |
| C | -5.88577400 | 1.40971700  | -0.91518000 |
| H | -3.77216600 | 1.56684200  | -1.26750400 |
| C | -6.94070200 | 0.59403200  | -0.51240100 |
| H | -7.50053300 | -1.37757300 | 0.15735800  |
| H | -6.07173500 | 2.44546400  | -1.18605600 |
| H | -7.95283000 | 0.98719000  | -0.47284400 |
| P | 1.49510300  | 0.15207200  | 0.08082600  |
| C | 2.77495800  | -1.10705800 | -0.41884200 |
| C | 1.66632100  | 0.25894200  | 1.93142300  |
| C | 2.28341800  | 1.74253000  | -0.54832500 |
| C | 2.57662900  | -1.60330800 | -1.85979300 |
| C | 2.96238400  | -2.30646300 | 0.51838800  |
| C | 0.74165900  | -0.77150000 | 2.59897200  |
| C | 1.42574700  | 1.64230600  | 2.54133200  |
| C | 1.35962300  | 2.96210400  | -0.53783100 |
| C | 2.97919200  | 1.65029400  | -1.91315700 |
| C | 3.77664600  | -2.42465700 | -2.31465000 |
| C | 4.15427900  | -3.14497600 | 0.05962900  |
| C | 4.00294800  | -3.60983600 | -1.38351500 |
| C | 0.96260700  | -0.81429600 | 4.10625800  |
| C | 1.63843500  | 1.60133300  | 4.05342500  |
| C | 0.75077300  | 0.56135400  | 4.72503900  |
| C | 2.13462000  | 4.24193400  | -0.83069700 |
| C | 3.74759500  | 2.93497700  | -2.21908700 |
| C | 2.85332300  | 4.16449800  | -2.16950200 |
| H | 3.71325100  | -0.52308200 | -0.37597300 |
| H | 2.71518200  | -0.01886500 | 2.13272200  |
| H | 3.07839200  | 1.89807900  | 0.20463200  |
| H | 1.67478200  | -2.22373000 | -1.88353700 |
| H | 2.39668500  | -0.77436200 | -2.55148800 |
| H | 3.12761800  | -1.98101100 | 1.55244800  |
| H | 2.04949600  | -2.91440500 | 0.50949600  |
| H | 3.62543700  | -2.76613100 | -3.34495200 |
| H | 4.67757000  | -1.79037000 | -2.32688000 |
| H | 4.27904700  | -4.00277900 | 0.73018300  |
| H | 5.07311200  | -2.54519200 | 0.15154300  |
| H | 4.88249900  | -4.18541800 | -1.69387500 |
| H | 3.14159500  | -4.28905500 | -1.45427700 |
| H | -0.29890000 | -0.46345900 | 2.40355300  |
| H | 0.85448400  | -1.76552300 | 2.15083300  |

|   |             |             |             |   |             |             |             |
|---|-------------|-------------|-------------|---|-------------|-------------|-------------|
| H | 2.09826100  | 2.38722000  | 2.10093900  | C | -1.57002800 | -3.04638800 | 2.52856700  |
| H | 0.39911700  | 1.96339200  | 2.31381400  | C | 2.40849300  | 0.25060100  | 2.69799500  |
| H | 0.29483400  | -1.55446500 | 4.56043400  | C | 6.10756400  | 2.33437300  | -0.00814400 |
| H | 1.98880100  | -1.15726200 | 4.30895100  | C | 3.66477000  | -1.68338300 | -1.79707200 |
| H | 1.45680100  | 2.59558900  | 4.47627400  | C | -0.89651500 | 2.39365500  | -0.84679800 |
| H | 2.69292500  | 1.36476000  | 4.26186600  | C | -1.71786900 | 1.03797100  | -1.03612200 |
| H | 0.94063400  | 0.53406800  | 5.80388900  | H | 0.35519800  | 2.64427700  | 1.00281700  |
| H | -0.30223600 | 0.85172700  | 4.60080700  | H | 1.10807400  | -4.32670600 | -0.39215700 |
| H | 0.57710200  | 2.81672000  | -1.29394200 | H | 0.53712300  | -4.35806800 | 1.28854600  |
| H | 0.81877000  | 3.05023600  | 0.40438600  | H | 2.40032100  | -3.05446300 | 2.04716300  |
| H | 3.67686900  | 0.80951500  | -1.95717700 | H | 3.15336600  | -3.42688900 | 0.48510300  |
| H | 2.22478600  | 1.47895100  | -2.69503200 | H | -3.67418400 | -2.68342100 | -2.41449100 |
| H | 1.45043100  | 5.09695600  | -0.80425500 | H | -4.17497500 | -3.12163200 | 1.82220100  |
| H | 2.87153400  | 4.41220100  | -0.03016100 | H | 4.40224200  | 1.97552900  | 2.08213300  |
| H | 4.23512700  | 2.84292500  | -3.19627800 | H | 5.47977200  | 0.32972100  | -1.73019000 |
| H | 4.55642800  | 3.04638300  | -1.48146200 | H | -0.10036800 | -3.18934100 | -2.40721700 |
| H | 3.43784100  | 5.07289400  | -2.35425800 | H | -1.52482100 | -2.80037300 | -3.38221700 |
| H | 2.10816500  | 4.10433200  | -2.97572200 | H | -0.58729600 | -1.52037500 | -2.60553500 |

**2b-RCB-1 $\beta$**

|    |             |             |             |   |             |             |             |
|----|-------------|-------------|-------------|---|-------------|-------------|-------------|
| Ru | -0.04561400 | 0.36791700  | -0.26934400 | H | -6.03815700 | -3.74694300 | 0.07401200  |
| Cl | -1.11733200 | 0.29042100  | 1.91382500  | H | -6.04836800 | -2.00172800 | -0.13240600 |
| Cl | 1.01685200  | 0.48218300  | -2.43717000 | H | -1.26350300 | -4.07905500 | 2.74207400  |
| N  | 0.07684300  | -2.58831400 | 0.22395600  | H | -0.70095700 | -2.39448000 | 2.65625600  |
| N  | 2.02738800  | -1.63357000 | 0.52745400  | H | -2.30356300 | -2.76404000 | 3.28689900  |
| C  | 0.74755900  | -1.42616300 | 0.18188400  | H | 2.86287200  | 0.85210600  | 3.48893100  |
| C  | 0.43175400  | 2.26333200  | -0.01886200 | H | 1.39717300  | 0.63581000  | 2.51993100  |
| C  | 0.97183100  | -3.72033500 | 0.51372900  | H | 2.27165000  | -0.76634500 | 3.08101600  |
| C  | 2.25444700  | -3.02248800 | 0.95890500  | H | 5.88287900  | 2.99024400  | -0.85599300 |
| C  | -1.33343100 | -2.72796300 | 0.02801500  | H | 6.19227400  | 2.96171100  | 0.88252300  |
| C  | 3.06731200  | -0.65445400 | 0.42855400  | H | 7.09058900  | 1.89374400  | -0.20343900 |
| C  | -1.86014200 | -2.66598200 | -1.27100600 | H | 3.93108100  | -2.69422400 | -1.46281500 |
| C  | -3.24885600 | -2.73857900 | -1.41319600 | H | 2.61764500  | -1.69906200 | -2.11843000 |
| C  | -4.09784300 | -2.88854600 | -0.31675900 | H | 4.27589400  | -1.45720300 | -2.67324300 |
| C  | -3.52768100 | -2.99607300 | 0.95529400  | H | -0.57614200 | 2.65392800  | -1.85986400 |
| C  | -2.15094800 | -2.92144700 | 1.15461200  | H | -2.60018200 | 0.97216000  | -0.39472700 |
| C  | 3.25009700  | 0.27562100  | 1.46087200  | H | -1.88090900 | 0.81094500  | -2.09280800 |
| C  | 4.24930300  | 1.24003400  | 1.29355400  | H | 1.30549900  | 2.59683900  | -0.58172300 |
| C  | 5.05463300  | 1.28109600  | 0.15562500  | C | -1.83062500 | 3.44131400  | -0.27769700 |
| C  | 4.85985000  | 0.31290700  | -0.83520400 | C | -2.36105800 | 4.38248000  | -1.16458600 |
| C  | 3.87538700  | -0.66474200 | -0.72129100 | C | -2.19140200 | 3.49594400  | 1.07157400  |
| C  | -0.97782800 | -2.53715300 | -2.47367900 | C | -3.23426100 | 5.36958200  | -0.71149700 |
| C  | -5.58506300 | -2.92728000 | -0.49197900 | H | -2.08277000 | 4.34279400  | -2.21589600 |
|    |             |             |             | C | -3.06826200 | 4.48006500  | 1.51907200  |



|   |             |            |             |
|---|-------------|------------|-------------|
| H | -1.79965500 | 2.75458100 | 1.76295500  |
| C | -3.59215400 | 5.42062200 | 0.63314500  |
| H | -3.63330200 | 6.09719900 | -1.41307400 |
| H | -3.34396600 | 4.50975200 | 2.56976600  |
| H | -4.27442600 | 6.18778200 | 0.98891000  |

***1a-trans-RCB-2 $\alpha\alpha$***

|    |             |             |             |
|----|-------------|-------------|-------------|
| Ru | 0.07950400  | 0.86043200  | 0.34765300  |
| Cl | -0.75322700 | 0.42232300  | 2.57791200  |
| Cl | 1.05118700  | 1.05973400  | -1.91243200 |
| C  | 1.15477700  | 2.31770600  | 1.18319500  |
| C  | 2.45389000  | 2.77743900  | 0.67252800  |
| C  | 3.59391500  | 2.42937600  | 1.41601800  |
| C  | 4.86631900  | 2.79797800  | 0.99418300  |
| C  | 5.02244800  | 3.53899800  | -0.17584600 |
| C  | 3.89794900  | 3.89947900  | -0.91954600 |
| C  | 2.62811900  | 3.51864000  | -0.50495200 |
| C  | -0.19450500 | 3.02029400  | 0.75646600  |
| C  | -1.10490600 | 2.32922600  | -0.32762600 |
| H  | 1.15680100  | 2.16249700  | 2.26679300  |
| H  | 3.46689000  | 1.85907100  | 2.33494000  |
| H  | 5.73454000  | 2.51681700  | 1.58383900  |
| H  | 6.01362100  | 3.83743300  | -0.50620800 |
| H  | 4.01321100  | 4.47270400  | -1.83533000 |
| H  | 1.76645900  | 3.77214400  | -1.11647600 |
| H  | 0.12927500  | 3.93445000  | 0.25272600  |
| H  | -0.77736400 | 3.22554500  | 1.65597800  |
| H  | -0.81539200 | 2.63047800  | -1.33803600 |
| C  | -2.56311900 | 2.26492200  | -0.16191000 |
| C  | -3.34235400 | 2.29349700  | -1.33182500 |
| C  | -3.21791600 | 2.16073300  | 1.07627100  |
| C  | -4.72987600 | 2.22398100  | -1.26948900 |
| H  | -2.83962200 | 2.36462700  | -2.29472900 |
| C  | -4.60374900 | 2.09628500  | 1.13581900  |
| H  | -2.63186900 | 2.09809900  | 1.98844400  |
| C  | -5.36643100 | 2.12654200  | -0.03368400 |
| H  | -5.31379200 | 2.24470100  | -2.18602900 |
| H  | -5.09415000 | 2.01570200  | 2.10226300  |
| H  | -6.45065100 | 2.07456500  | 0.02037300  |
| P  | 0.20758600  | -1.44562800 | -0.08021500 |
| C  | 0.17957000  | -2.60795600 | 1.32074400  |
| C  | -0.62065400 | -3.75496600 | 1.31801100  |

|   |             |             |             |
|---|-------------|-------------|-------------|
| C | 1.05828500  | -2.37935000 | 2.38497200  |
| C | -0.54245600 | -4.66074200 | 2.37358900  |
| H | -1.31072500 | -3.93779300 | 0.49665300  |
| C | 1.14032900  | -3.29064600 | 3.43145700  |
| H | 1.66135100  | -1.47379100 | 2.40252900  |
| C | 0.33868300  | -4.43109100 | 3.42790400  |
| H | -1.17200000 | -5.54606400 | 2.37040300  |
| H | 1.81986500  | -3.10287500 | 4.25773300  |
| H | 0.39654700  | -5.13830700 | 4.25073600  |
| C | -1.42073600 | -1.49143900 | -0.87476300 |
| C | -1.53836500 | -1.39029300 | -2.26877600 |
| C | -2.56984800 | -1.45038000 | -0.06822700 |
| C | -2.80005200 | -1.29653000 | -2.84763600 |
| H | -0.64334100 | -1.35813500 | -2.88552500 |
| C | -3.82594700 | -1.35825100 | -0.65880300 |
| H | -2.46937500 | -1.46319700 | 1.01612000  |
| C | -3.94149700 | -1.28840400 | -2.04625200 |
| H | -2.89035000 | -1.21869200 | -3.92740200 |
| H | -4.71235500 | -1.31770600 | -0.03240700 |
| H | -4.92404600 | -1.20272700 | -2.50318900 |
| C | 1.43043700  | -2.19402300 | -1.19717000 |
| C | 2.71747000  | -1.65345000 | -1.27595000 |
| C | 1.12813300  | -3.37758000 | -1.87982400 |
| C | 3.69157800  | -2.29278700 | -2.03668800 |
| H | 2.94066900  | -0.71903100 | -0.76624000 |
| C | 2.10295600  | -4.00580300 | -2.64956200 |
| H | 0.12874300  | -3.80455000 | -1.81407400 |
| C | 3.38517000  | -3.46422000 | -2.72658300 |
| H | 4.68783200  | -1.86506000 | -2.10186300 |
| H | 1.86050000  | -4.91798600 | -3.18770200 |
| H | 4.14573000  | -3.95558500 | -3.32728900 |

***1a-cis-RCB-2 $\alpha\alpha$***

|    |             |             |             |
|----|-------------|-------------|-------------|
| Ru | 0.22989000  | -0.73023700 | 0.67756300  |
| Cl | -0.06138900 | 0.25957800  | 2.90701300  |
| Cl | 0.46166900  | -1.50989000 | -1.60829200 |
| C  | 1.92200200  | -1.46256400 | 1.46937500  |
| C  | 3.19574400  | -1.42442600 | 0.74024800  |
| C  | 4.17961600  | -0.55400300 | 1.24533700  |
| C  | 5.40730100  | -0.41214300 | 0.61034300  |
| C  | 5.68423300  | -1.15216500 | -0.53857700 |
| C  | 4.72207700  | -2.02824000 | -1.04360000 |

|   |             |             |             |
|---|-------------|-------------|-------------|
| C | 3.48886100  | -2.16200700 | -0.41748800 |
| C | 0.95223900  | -2.70420500 | 1.39137200  |
| C | -0.56836800 | -2.35442700 | 1.53368200  |
| H | 2.02953000  | -1.12127300 | 2.50272700  |
| H | 3.95881100  | 0.01770800  | 2.14556200  |
| H | 6.15094700  | 0.26903000  | 1.01581600  |
| H | 6.64419500  | -1.04923400 | -1.03746900 |
| H | 4.93132100  | -2.60519800 | -1.94017500 |
| H | 2.73391700  | -2.81337300 | -0.84649600 |
| H | -0.83131300 | -2.15495000 | 2.57559300  |
| H | 1.16674000  | -3.20547100 | 2.34024400  |
| H | 1.16749600  | -3.35087300 | 0.54005500  |
| C | -1.62265200 | -3.08083200 | 0.81318300  |
| C | -2.93857500 | -2.89122300 | 1.27463400  |
| C | -1.42038300 | -3.89770100 | -0.30996300 |
| C | -4.01747400 | -3.48031700 | 0.62698000  |
| H | -3.10048100 | -2.25505900 | 2.14323300  |
| C | -2.50016700 | -4.49647100 | -0.94813400 |
| H | -0.41972200 | -4.03750800 | -0.70638800 |
| C | -3.80136300 | -4.28859700 | -0.48864700 |
| H | -5.02602800 | -3.31316600 | 0.99576200  |
| H | -2.32501000 | -5.12433900 | -1.81740400 |
| H | -4.64044600 | -4.75661700 | -0.99635400 |
| C | -2.04098400 | 1.18095200  | -1.12442300 |
| C | -0.80825300 | 2.79391200  | 0.88905500  |
| C | 0.85683400  | 1.79953200  | -1.28431600 |
| C | -2.67268400 | 2.32351900  | -1.63736900 |
| C | -2.62941300 | -0.07597000 | -1.30866400 |
| C | 0.00744400  | 3.92795000  | 0.85968700  |
| C | -1.90739000 | 2.75495300  | 1.75740000  |
| C | 2.15266700  | 1.75760500  | -0.74851400 |
| C | 0.67811800  | 2.03783100  | -2.64864800 |
| C | -3.86294600 | 2.20339000  | -2.34629300 |
| H | -2.23184300 | 3.30549300  | -1.47509000 |
| C | -3.83167400 | -0.18732900 | -2.00315900 |
| H | -2.14472400 | -0.97097900 | -0.92354600 |
| C | -0.27865200 | 5.01475400  | 1.68538800  |
| H | 0.86322100  | 3.96919300  | 0.19078600  |
| C | -2.19178800 | 3.84228500  | 2.57261100  |
| H | -2.53010400 | 1.86458300  | 1.80155200  |
| C | 3.25551100  | 1.95921600  | -1.57035000 |
| H | 2.29598100  | 1.55203500  | 0.31333600  |
| C | 1.78632700  | 2.25006200  | -3.46469100 |

|   |             |             |             |
|---|-------------|-------------|-------------|
| H | -0.32179300 | 2.03254100  | -3.07602800 |
| C | -4.44443900 | 0.94774900  | -2.52715700 |
| H | -4.34172800 | 3.09121600  | -2.75020400 |
| H | -4.28203700 | -1.16734300 | -2.13224700 |
| C | -1.37649300 | 4.97423300  | 2.53951100  |
| H | 0.35920700  | 5.89362000  | 1.65569000  |
| H | -3.04429200 | 3.80295700  | 3.24451800  |
| C | 3.07251800  | 2.20718300  | -2.92980100 |
| H | 4.25580900  | 1.90733900  | -1.14967200 |
| H | 1.64365700  | 2.43200500  | -4.52627000 |
| H | -5.37985800 | 0.85817200  | -3.07296300 |
| H | -1.59733300 | 5.82205900  | 3.18211700  |
| H | 3.93364400  | 2.35686300  | -3.57527900 |
| P | -0.50162900 | 1.34675000  | -0.16843200 |

*Ib-trans-RCB-2 $\alpha\alpha$*

|    |             |             |             |
|----|-------------|-------------|-------------|
| Ru | -0.29561700 | -0.91738000 | -0.13944600 |
| Cl | 0.61988900  | -1.63980200 | 2.03236300  |
| Cl | -1.41204900 | -0.32613900 | -2.20839100 |
| C  | -1.79968000 | -2.15685200 | 0.36397000  |
| C  | -3.20263200 | -1.99362000 | -0.04315800 |
| C  | -4.08763800 | -1.49071700 | 0.92674400  |
| C  | -5.42891400 | -1.27055400 | 0.63252300  |
| C  | -5.92109500 | -1.57698100 | -0.63418200 |
| C  | -5.06006300 | -2.10067800 | -1.59983800 |
| C  | -3.71675700 | -2.29938400 | -1.31223700 |
| C  | -0.79608100 | -3.05321800 | -0.45083900 |
| C  | 0.45237800  | -2.41506000 | -1.18752600 |
| H  | -1.69731800 | -2.35210500 | 1.43617300  |
| H  | -3.70539000 | -1.26805600 | 1.92256900  |
| H  | -6.09140600 | -0.87032600 | 1.39560200  |
| H  | -6.96974700 | -1.41467100 | -0.86777400 |
| H  | -5.43727000 | -2.34353200 | -2.58940500 |
| H  | -3.05334300 | -2.66725600 | -2.08866800 |
| H  | -1.38309000 | -3.48251000 | -1.26503400 |
| H  | -0.41673800 | -3.79516100 | 0.25410200  |
| H  | 0.23472900  | -2.27610600 | -2.25113800 |
| C  | 1.83126500  | -2.87154200 | -0.94307900 |
| C  | 2.80088200  | -2.41881800 | -1.85587200 |
| C  | 2.24907400  | -3.67311400 | 0.12861600  |
| C  | 4.14484900  | -2.73118000 | -1.68948800 |
| H  | 2.48273300  | -1.79875400 | -2.69304000 |
| C  | 3.59106400  | -3.99786300 | 0.28524900  |

|   |             |             |             |
|---|-------------|-------------|-------------|
| H | 1.52734500  | -4.01493400 | 0.86326200  |
| C | 4.54587400  | -3.52347200 | -0.61484000 |
| H | 4.87833800  | -2.36037400 | -2.40041400 |
| H | 3.89559100  | -4.61739500 | 1.12422400  |
| H | 5.59481200  | -3.77362000 | -0.48038100 |
| P | 0.41287500  | 1.37721200  | 0.19192600  |
| C | 0.73493900  | 2.62081400  | -1.18745200 |
| C | 2.01190600  | 1.52787400  | 1.14459000  |
| C | -0.88550900 | 2.18375100  | 1.25725200  |
| C | -0.28531100 | 2.67570500  | -2.32883100 |
| C | 2.13681700  | 2.55247200  | -1.81402500 |
| C | 3.02251100  | 0.47949200  | 0.65153200  |
| C | 1.92942500  | 1.50950100  | 2.67480800  |
| C | -1.44764800 | 1.15111300  | 2.24270200  |
| C | -2.02953700 | 2.85477200  | 0.49093200  |
| C | -0.07157400 | 3.92588300  | -3.17566900 |
| C | 2.38420300  | 3.76366100  | -2.71428000 |
| C | 1.32085100  | 3.92068900  | -3.79120000 |
| C | 4.39955000  | 0.72344800  | 1.25484900  |
| C | 3.31399100  | 1.75385300  | 3.27204600  |
| C | 4.32752600  | 0.72795200  | 2.77727600  |
| C | -2.46387800 | 1.76686600  | 3.19466600  |
| C | -3.04272600 | 3.46896600  | 1.45466100  |
| C | -3.59617000 | 2.44168900  | 2.43235100  |
| H | 0.67796900  | 3.57106300  | -0.62159900 |
| H | 2.38464700  | 2.52951000  | 0.86662400  |
| H | -0.35258800 | 2.96717500  | 1.82238300  |
| H | -0.14934600 | 1.78858200  | -2.95436400 |
| H | -1.31402300 | 2.61366600  | -1.97329100 |
| H | 2.92850400  | 2.51624500  | -1.06120300 |
| H | 2.21655500  | 1.62545100  | -2.40232500 |
| H | -0.83853900 | 3.97832600  | -3.95630600 |
| H | -0.19915400 | 4.82648500  | -2.55419500 |
| H | 3.38247400  | 3.68830600  | -3.16073100 |
| H | 2.39776800  | 4.66682600  | -2.08579200 |
| H | 1.49925500  | 4.83192800  | -4.37361400 |
| H | 1.39276400  | 3.08112500  | -4.49725800 |
| H | 2.66036600  | -0.51115200 | 0.95198900  |
| H | 3.08010900  | 0.46385100  | -0.44366400 |
| H | 1.22871700  | 2.27104200  | 3.03946200  |
| H | 1.55410900  | 0.53633900  | 3.00764600  |
| H | 5.10087700  | -0.04154500 | 0.90175300  |
| H | 4.79126500  | 1.69151700  | 0.90351300  |

|   |             |             |             |
|---|-------------|-------------|-------------|
| H | 3.25053400  | 1.73669900  | 4.36606300  |
| H | 3.65782400  | 2.76350000  | 2.99800300  |
| H | 5.31466400  | 0.92540400  | 3.21084500  |
| H | 4.02528000  | -0.27110300 | 3.12238100  |
| H | -1.94135100 | 0.35907400  | 1.65388300  |
| H | -0.64877500 | 0.64846200  | 2.79466900  |
| H | -1.64498600 | 3.63561800  | -0.17390600 |
| H | -2.52662300 | 2.10704800  | -0.14623400 |
| H | -2.85028600 | 0.99523300  | 3.87077800  |
| H | -1.95606100 | 2.50763000  | 3.83110100  |
| H | -3.85179000 | 3.93783900  | 0.88348600  |
| H | -2.55435000 | 4.27797400  | 2.01858600  |
| H | -4.30563300 | 2.91145300  | 3.12290400  |
| H | -4.15999900 | 1.68006700  | 1.87404600  |

*Ib-cis-RCB-2 $\alpha\alpha$*

|    |             |             |             |
|----|-------------|-------------|-------------|
| Ru | -0.48698300 | 0.42905500  | -0.84114000 |
| Cl | -0.06129100 | -0.93069500 | -2.84173100 |
| Cl | -1.27677300 | 1.65303500  | 1.11522100  |
| C  | 0.03936700  | 1.94582000  | -1.98685200 |
| C  | 0.81960900  | 3.01670000  | -1.34374000 |
| C  | 2.20903800  | 2.98160400  | -1.56303600 |
| C  | 3.05695800  | 3.88944400  | -0.93999100 |
| C  | 2.53042800  | 4.86630000  | -0.09564700 |
| C  | 1.15205000  | 4.92457500  | 0.11358900  |
| C  | 0.30360500  | 4.00914400  | -0.49814800 |
| C  | -1.53763900 | 1.96118300  | -2.05508700 |
| C  | -2.30312900 | 0.62914900  | -1.71771800 |
| H  | 0.47028500  | 1.61408000  | -2.93662900 |
| H  | 2.61494700  | 2.21516700  | -2.22237900 |
| H  | 4.12873100  | 3.83595600  | -1.11445300 |
| H  | 3.18841800  | 5.57954200  | 0.39344600  |
| H  | 0.73446400  | 5.68369100  | 0.76933400  |
| H  | -0.76074900 | 4.04389400  | -0.28841300 |
| H  | -2.33620100 | -0.03448400 | -2.58466700 |
| H  | -1.71988200 | 2.05378400  | -3.12994000 |
| H  | -1.94213400 | 2.79625200  | -1.48281400 |
| C  | -3.57205400 | 0.62717600  | -0.97634300 |
| C  | -4.27797500 | -0.58984700 | -0.95773100 |
| C  | -4.12608800 | 1.72419000  | -0.29941500 |
| C  | -5.46961200 | -0.71983900 | -0.25534400 |
| H  | -3.86051100 | -1.44310000 | -1.49128400 |
| C  | -5.32975600 | 1.60004000  | 0.38235900  |

|   |             |             |             |
|---|-------------|-------------|-------------|
| H | -3.60538500 | 2.67602200  | -0.28850400 |
| C | -6.00169500 | 0.37789300  | 0.41919500  |
| H | -5.98868900 | -1.67484700 | -0.24275700 |
| H | -5.74242300 | 2.46194800  | 0.89949900  |
| H | -6.93757000 | 0.28535200  | 0.96337900  |
| P | 0.90228000  | -1.07904700 | 0.43745500  |
| C | -0.27791600 | -1.96289900 | 1.57847000  |
| C | 2.19740300  | -0.30012700 | 1.56318800  |
| C | 1.83847800  | -2.49220400 | -0.34785500 |
| C | -1.61317500 | -2.14658800 | 0.83798100  |
| C | -0.51769100 | -1.30399900 | 2.94005500  |
| C | 1.78319600  | 1.08240100  | 2.07227600  |
| C | 3.62029700  | -0.24248700 | 0.99553300  |
| C | 2.76669300  | -2.10656800 | -1.51117800 |
| C | 0.98039800  | -3.68870600 | -0.78141500 |
| C | -2.60870600 | -2.95196400 | 1.66190000  |
| C | -1.51631900 | -2.11828000 | 3.75909000  |
| C | -2.83627500 | -2.29455000 | 3.01719400  |
| C | 2.77902900  | 1.64200300  | 3.08068400  |
| C | 4.60302800  | 0.31088300  | 2.02509800  |
| C | 4.19023400  | 1.69003400  | 2.51610500  |
| C | 3.68581100  | -3.27286300 | -1.85708700 |
| C | 1.87276100  | -4.86674600 | -1.16991300 |
| C | 2.87135200  | -4.49590600 | -2.25937800 |
| H | 0.17353500  | -2.95292700 | 1.76047600  |
| H | 2.22068900  | -1.00133100 | 2.41599000  |
| H | 2.46801100  | -2.83423400 | 0.49686400  |
| H | -2.04003500 | -1.14583900 | 0.66048100  |
| H | -1.45930700 | -2.59699600 | -0.15113600 |
| H | 0.42241400  | -1.20012900 | 3.49562100  |
| H | -0.91382600 | -0.29366500 | 2.78435900  |
| H | -3.55218200 | -3.04934500 | 1.11187300  |
| H | -2.22242100 | -3.97321500 | 1.80458900  |
| H | -1.67995300 | -1.63062700 | 4.72671900  |
| H | -1.08995000 | -3.10907800 | 3.97982900  |
| H | -3.54019600 | -2.88036600 | 3.61922400  |
| H | -3.29892200 | -1.30848300 | 2.85997300  |
| H | 1.70251400  | 1.76441600  | 1.21157700  |
| H | 0.78312200  | 1.05880800  | 2.50631100  |
| H | 3.95956800  | -1.23320600 | 0.67881500  |
| H | 3.63348500  | 0.40254300  | 0.10416800  |
| H | 2.44915800  | 2.63851000  | 3.39611300  |
| H | 2.77094600  | 1.01349600  | 3.98512600  |

|   |            |             |             |
|---|------------|-------------|-------------|
| H | 5.60932000 | 0.33184900  | 1.59079800  |
| H | 4.65149200 | -0.37981100 | 2.88063000  |
| H | 4.89945700 | 2.06207300  | 3.26436800  |
| H | 4.21977600 | 2.39931600  | 1.67570000  |
| H | 2.14403200 | -1.86262200 | -2.37585300 |
| H | 3.34854100 | -1.20741300 | -1.29777200 |
| H | 0.29786900 | -4.00690600 | 0.01437200  |
| H | 0.35962200 | -3.38562500 | -1.63479500 |
| H | 4.36717200 | -2.98278100 | -2.66507200 |
| H | 4.32024000 | -3.51980200 | -0.99057500 |
| H | 1.24999200 | -5.71100400 | -1.48750200 |
| H | 2.42146300 | -5.20730500 | -0.27822600 |
| H | 3.52631600 | -5.34577300 | -2.48347500 |
| H | 2.32467500 | -4.26807900 | -3.18542300 |

*2-trans-RCB-2 $\alpha$*

|    |             |             |             |
|----|-------------|-------------|-------------|
| Ru | -0.02183900 | -0.46185500 | -0.21412800 |
| Cl | -0.08228900 | -0.84742700 | 2.21325400  |
| Cl | 0.18103800  | 0.06965800  | -2.57654000 |
| N  | 1.25225900  | 2.25194500  | 0.21459200  |
| N  | -0.84877500 | 2.21372800  | 0.83132200  |
| C  | 0.15217800  | 1.48377800  | 0.30667300  |
| C  | -1.42726400 | -1.89213100 | -0.21496600 |
| C  | -2.67932900 | -1.87637800 | -0.98985800 |
| C  | -3.86391100 | -2.15108000 | -0.28434200 |
| C  | -5.09314600 | -2.19225900 | -0.93170600 |
| C  | -5.16587400 | -1.94593500 | -2.30111200 |
| C  | -3.99870900 | -1.66370700 | -3.01367900 |
| C  | -2.76702000 | -1.63093200 | -2.36975600 |
| C  | 1.05004200  | 3.55081900  | 0.87806800  |
| C  | -0.46485000 | 3.62523900  | 0.98271100  |
| C  | 2.55733800  | 1.83627100  | -0.20324200 |
| C  | -2.20871900 | 1.78110600  | 0.91734500  |
| C  | 2.99068300  | 2.23452000  | -1.48072900 |
| C  | 4.26985200  | 1.85708100  | -1.88539400 |
| C  | 5.12360100  | 1.13321000  | -1.04660900 |
| C  | 4.67749700  | 0.80930500  | 0.23256700  |
| C  | 3.39454500  | 1.13868900  | 0.68029300  |
| C  | -2.75048800 | 1.54771800  | 2.19618200  |
| C  | -4.06417100 | 1.09546800  | 2.27577700  |
| C  | -4.84663500 | 0.89196900  | 1.13269200  |
| C  | -4.29164300 | 1.18238800  | -0.10939200 |
| C  | -2.97652900 | 1.64099000  | -0.24902500 |

|   |             |             |             |
|---|-------------|-------------|-------------|
| C | 2.09787900  | 3.02842900  | -2.38103900 |
| C | 6.47208200  | 0.68297600  | -1.51895800 |
| C | 2.95956000  | 0.72710800  | 2.04917100  |
| C | -1.94633700 | 1.79922200  | 3.43264800  |
| C | -6.24684500 | 0.37303800  | 1.25013400  |
| C | -2.46866900 | 1.98509600  | -1.61534000 |
| C | -0.15318500 | -2.61392900 | -0.81508000 |
| C | 1.25671800  | -1.94895600 | -0.65289100 |
| H | -1.60591300 | -2.21622000 | 0.81403000  |
| H | -3.80517800 | -2.33146400 | 0.78791400  |
| H | -5.99465100 | -2.41567200 | -0.36691800 |
| H | -6.12462800 | -1.97513500 | -2.81253400 |
| H | -4.04892000 | -1.46739100 | -4.08157600 |
| H | -1.86540200 | -1.38599400 | -2.92557800 |
| H | 1.49155300  | 4.35738000  | 0.28569600  |
| H | 1.54164900  | 3.53867800  | 1.86156500  |
| H | -0.81835800 | 4.01969000  | 1.93957600  |
| H | -0.91775500 | 4.21805100  | 0.17440200  |
| H | 4.60938700  | 2.13981000  | -2.88086800 |
| H | 5.33578400  | 0.26234400  | 0.90652600  |
| H | -4.48690200 | 0.88747100  | 3.25802000  |
| H | -4.88939900 | 1.03525300  | -1.00880800 |
| H | 1.72010800  | 3.93339600  | -1.88992600 |
| H | 2.62835300  | 3.33635700  | -3.28504200 |
| H | 1.22529600  | 2.43597300  | -2.67883600 |
| H | 6.90173400  | 1.37262200  | -2.25057600 |
| H | 7.17771200  | 0.58066300  | -0.68959800 |
| H | 6.40741000  | -0.29810300 | -2.00657800 |
| H | 3.79516600  | 0.77732600  | 2.75328200  |
| H | 2.13352200  | 1.32921200  | 2.43711800  |
| H | 2.59004100  | -0.30515400 | 2.04888300  |
| H | -2.38411400 | 1.28771500  | 4.29299900  |
| H | -0.91860400 | 1.44277500  | 3.31677200  |
| H | -1.91432400 | 2.86969400  | 3.67515300  |
| H | -6.70898800 | 0.24487300  | 0.26764800  |
| H | -6.26830100 | -0.59861700 | 1.75748300  |
| H | -6.88086200 | 1.04685400  | 1.83650000  |
| H | -3.14780700 | 2.69364300  | -2.10183000 |
| H | -1.46447000 | 2.41502400  | -1.61225100 |
| H | -2.41335500 | 1.09692800  | -2.25334500 |
| H | -0.32448700 | -2.78765600 | -1.87911900 |
| H | -0.10297400 | -3.54416400 | -0.24427000 |
| H | 1.68365600  | -1.73178700 | -1.63624900 |

|   |            |             |             |
|---|------------|-------------|-------------|
| C | 2.25873000 | -2.49960900 | 0.27156600  |
| C | 3.60745400 | -2.26577500 | -0.04092400 |
| C | 1.96102400 | -3.23445200 | 1.43019500  |
| C | 4.62705700 | -2.72397800 | 0.78605900  |
| H | 3.84495500 | -1.70050100 | -0.94076800 |
| C | 2.97937100 | -3.70168900 | 2.25069600  |
| H | 0.92513200 | -3.41156100 | 1.70375200  |
| C | 4.31598500 | -3.44305700 | 1.93824500  |
| H | 5.66402700 | -2.52113100 | 0.52734000  |
| H | 2.73033900 | -4.26395300 | 3.14640100  |
| H | 5.10773100 | -3.80657000 | 2.58784200  |

*2-cis-RCB-2 $\alpha$*

|    |             |             |             |
|----|-------------|-------------|-------------|
| Ru | 0.03618100  | 0.40061700  | -0.42182000 |
| Cl | 0.78704600  | -0.65535500 | -2.52676600 |
| Cl | -0.61850600 | 1.23920400  | 1.75362700  |
| C  | 1.26028300  | 1.90038300  | -0.99538700 |
| C  | 2.16595300  | 2.60221200  | -0.07361100 |
| C  | 3.54480400  | 2.43036200  | -0.28461300 |
| C  | 4.48035200  | 3.04047200  | 0.54345700  |
| C  | 4.05560400  | 3.84820900  | 1.59617300  |
| C  | 2.68893400  | 4.03924800  | 1.80961700  |
| C  | 1.75306300  | 3.42299100  | 0.98871500  |
| C  | -0.17173200 | 2.45416500  | -1.28550000 |
| C  | -1.25957400 | 1.36668500  | -1.62189200 |
| H  | 1.76667500  | 1.60964500  | -1.91967900 |
| H  | 3.87190200  | 1.79536100  | -1.10660500 |
| H  | 5.54188400  | 2.88360900  | 0.36449100  |
| H  | 4.78238100  | 4.32920400  | 2.24543700  |
| H  | 2.35034200  | 4.66737500  | 2.62907900  |
| H  | 0.69483500  | 3.55025200  | 1.19206200  |
| H  | -1.12674400 | 1.00420200  | -2.64635000 |
| H  | -0.04560400 | 2.95546300  | -2.24966500 |
| H  | -0.51940600 | 3.15238400  | -0.52230600 |
| N  | 1.31971600  | -2.18586200 | 0.50096500  |
| N  | -0.85863000 | -2.21159200 | 0.71257500  |
| C  | 0.19402400  | -1.47742500 | 0.31163600  |
| C  | 1.05514100  | -3.45925100 | 1.19145200  |
| C  | -0.46181900 | -3.57064300 | 1.11147600  |
| C  | 2.65630700  | -1.79243800 | 0.17963800  |
| C  | -2.22233100 | -1.78408000 | 0.77671100  |
| C  | 3.31855000  | -0.85671200 | 0.98896800  |
| C  | 4.63661900  | -0.53209500 | 0.66201700  |

|   |             |             |             |
|---|-------------|-------------|-------------|
| C | 5.28858400  | -1.09514100 | -0.43521400 |
| C | 4.60335800  | -2.04190400 | -1.19929800 |
| C | 3.29169500  | -2.41630400 | -0.90655900 |
| C | -2.99974900 | -1.76224900 | -0.39028000 |
| C | -4.33700600 | -1.37295800 | -0.27390800 |
| C | -4.89919400 | -1.01090600 | 0.94892700  |
| C | -4.09286700 | -1.05734500 | 2.09036200  |
| C | -2.75851900 | -1.45199600 | 2.03358700  |
| C | 2.64929000  | -0.21630600 | 2.16370100  |
| C | 6.67447200  | -0.65977000 | -0.80165500 |
| C | 2.59556600  | -3.45602100 | -1.72827500 |
| C | -2.43106200 | -2.14291200 | -1.72099500 |
| C | -6.33491800 | -0.59370100 | 1.04427900  |
| C | -1.93324300 | -1.52943100 | 3.28036900  |
| H | 1.42721300  | -3.40141500 | 2.22365200  |
| H | 1.57664600  | -4.27801400 | 0.68770700  |
| H | -0.79966400 | -4.29231300 | 0.35521200  |
| H | -0.92800300 | -3.83467600 | 2.06535600  |
| H | 5.16025800  | 0.19582200  | 1.28016000  |
| H | 5.09846700  | -2.49834200 | -2.05542700 |
| H | -4.95310100 | -1.35054200 | -1.17111400 |
| H | -4.51235200 | -0.77026400 | 3.05398500  |
| H | 2.07032100  | -0.93459900 | 2.75497400  |
| H | 3.38468500  | 0.25741300  | 2.81901400  |
| H | 1.93598300  | 0.56248900  | 1.86570400  |
| H | 7.25163600  | -0.36423900 | 0.07922900  |
| H | 7.22615800  | -1.44680100 | -1.32283300 |
| H | 6.64798100  | 0.20856800  | -1.47205000 |
| H | 2.74248200  | -4.46161800 | -1.31182800 |
| H | 1.52148000  | -3.26074200 | -1.79490000 |
| H | 2.98854100  | -3.47102100 | -2.74764500 |
| H | -3.22899300 | -2.33930300 | -2.44180100 |
| H | -1.78708100 | -1.35770200 | -2.13645400 |
| H | -1.79522600 | -3.03276300 | -1.66024000 |
| H | -6.92819000 | -1.32058800 | 1.61056900  |
| H | -6.43669500 | 0.36816900  | 1.55812900  |
| H | -6.78758100 | -0.49103200 | 0.05433400  |
| H | -1.97388400 | -2.53233500 | 3.72618100  |
| H | -0.88593800 | -1.28232800 | 3.08722100  |
| H | -2.30099300 | -0.82758300 | 4.03221800  |
| C | -2.67760700 | 1.64360200  | -1.34084600 |
| C | -3.60918200 | 1.25471800  | -2.31952100 |
| C | -3.15393900 | 2.28971400  | -0.18822200 |

|   |             |            |             |
|---|-------------|------------|-------------|
| C | -4.96739400 | 1.50908200 | -2.16275300 |
| H | -3.24838000 | 0.75320300 | -3.21643400 |
| C | -4.51129100 | 2.54124100 | -0.03294800 |
| H | -2.45663300 | 2.56597900 | 0.59733400  |
| C | -5.42360000 | 2.15692800 | -1.01706400 |
| H | -5.66827700 | 1.20268300 | -2.93547000 |
| H | -4.86281700 | 3.03732200 | 0.86853900  |
| H | -6.48448900 | 2.35616700 | -0.88640800 |

*Ia-trans-RCB-2 $\alpha\beta$*

|    |             |             |             |
|----|-------------|-------------|-------------|
| Ru | 0.51473700  | -0.40071900 | 0.32636600  |
| Cl | 0.57708100  | -1.84074000 | -1.64788900 |
| Cl | 0.22371200  | 0.65916500  | 2.48317300  |
| C  | 1.73695000  | -1.69329700 | 1.19071400  |
| C  | 2.71105000  | -0.53802000 | 0.77687500  |
| C  | 2.15938200  | 0.42795200  | -0.38378400 |
| H  | 1.91925400  | -2.63510500 | 0.67116600  |
| H  | 2.44010200  | 0.02938500  | -1.36449900 |
| C  | 2.29882600  | 1.88947500  | -0.29373300 |
| C  | 2.22514900  | 2.60128500  | -1.50486700 |
| C  | 2.42611500  | 2.61566200  | 0.90099900  |
| C  | 2.25856800  | 3.99103200  | -1.52258700 |
| H  | 2.13036100  | 2.04371700  | -2.43517700 |
| C  | 2.47116300  | 4.00436200  | 0.87915500  |
| H  | 2.44572100  | 2.09326500  | 1.85239100  |
| C  | 2.38130600  | 4.69911500  | -0.32820800 |
| H  | 2.19184800  | 4.52091600  | -2.46891900 |
| H  | 2.56669800  | 4.54928700  | 1.81446800  |
| H  | 2.40948900  | 5.78533400  | -0.33683400 |
| H  | 1.60969600  | -1.76634000 | 2.27213900  |
| H  | 2.89094500  | 0.07792000  | 1.66182100  |
| C  | 4.01345500  | -1.10780000 | 0.24112600  |
| C  | 5.20545900  | -0.63351200 | 0.79127300  |
| C  | 4.05519500  | -2.05413300 | -0.78655100 |
| C  | 6.43120000  | -1.11145500 | 0.32926400  |
| H  | 5.17254500  | 0.11132200  | 1.58407300  |
| C  | 5.28157300  | -2.52542200 | -1.24525600 |
| H  | 3.12537400  | -2.40454800 | -1.23110400 |
| C  | 6.47274800  | -2.05940000 | -0.68911100 |
| H  | 7.35242700  | -0.73754800 | 0.76782100  |
| H  | 5.30510300  | -3.26090000 | -2.04492800 |
| H  | 7.42710800  | -2.43218100 | -1.05007500 |
| P  | -1.80402600 | -0.21305500 | -0.04489300 |

|   |             |             |             |   |             |             |             |
|---|-------------|-------------|-------------|---|-------------|-------------|-------------|
| C | -2.51042200 | -0.54329200 | -1.68880100 | H | -1.54529500 | 1.18949500  | 1.95734700  |
| C | -3.70461900 | -1.24901600 | -1.85911400 | H | -2.40672300 | -0.57538100 | 2.69658800  |
| C | -1.87751600 | 0.02605500  | -2.80005900 | C | -2.41552200 | 1.26961800  | 0.01921100  |
| C | -4.25629100 | -1.38849600 | -3.13155700 | C | -2.73300200 | 2.61403400  | 0.27712500  |
| H | -4.20297600 | -1.69522400 | -1.00130700 | C | -2.79206200 | 0.72093900  | -1.21900600 |
| C | -2.43515800 | -0.10915800 | -4.06546600 | C | -3.41136200 | 3.38636100  | -0.66032300 |
| H | -0.93344600 | 0.55292800  | -2.67091800 | H | -2.43778100 | 3.04876400  | 1.23072700  |
| C | -3.62398800 | -0.81891300 | -4.23339700 | C | -3.48054600 | 1.48938800  | -2.14792300 |
| H | -5.18156600 | -1.94382400 | -3.25822000 | H | -2.52900700 | -0.30705200 | -1.44928300 |
| H | -1.93366000 | 0.32772700  | -4.92422000 | C | -3.79382400 | 2.82327500  | -1.87542300 |
| H | -4.05415700 | -0.93122200 | -5.22465100 | H | -3.64436600 | 4.42483300  | -0.43942200 |
| C | -2.49760200 | -1.43972500 | 1.08956100  | H | -3.77374300 | 1.04489300  | -3.09554900 |
| C | -2.99842200 | -1.08080700 | 2.34600800  | H | -4.33277500 | 3.41851900  | -2.60824500 |
| C | -2.39992800 | -2.79345600 | 0.73258000  | H | -1.45463500 | -2.95166800 | 1.25332300  |
| C | -3.43605500 | -2.07007900 | 3.22169800  | C | -3.58440100 | -1.27391500 | 1.02957900  |
| H | -3.02473500 | -0.03514200 | 2.64086800  | C | -4.69951700 | -0.50611500 | 1.38919000  |
| C | -2.84026400 | -3.77424700 | 1.61476200  | C | -3.74856000 | -2.29808400 | 0.09494200  |
| H | -1.96940200 | -3.06817000 | -0.22957000 | C | -5.94777600 | -0.74816500 | 0.82710800  |
| C | -3.36294500 | -3.41317800 | 2.85641300  | H | -4.57758900 | 0.30281500  | 2.10834900  |
| H | -3.82513800 | -1.78986300 | 4.19638600  | C | -4.99809200 | -2.53526100 | -0.47609700 |
| H | -2.76806500 | -4.82125000 | 1.33487800  | H | -2.89280500 | -2.88664100 | -0.22084000 |
| H | -3.70378200 | -4.18114500 | 3.54531900  | C | -6.09999800 | -1.76356900 | -0.11581000 |
| C | -2.47488300 | 1.43071200  | 0.35435700  | H | -6.79881500 | -0.13890700 | 1.11888700  |
| C | -1.61776500 | 2.53463500  | 0.41269900  | H | -5.10603100 | -3.32852800 | -1.21091200 |
| C | -3.85610500 | 1.61470600  | 0.49507600  | H | -7.07125300 | -1.95160500 | -0.56513200 |
| C | -2.13857800 | 3.81019500  | 0.61487000  | P | 1.93611200  | -0.15101600 | -0.03820200 |
| H | -0.54199600 | 2.39490700  | 0.32268900  | C | 2.66623000  | -0.99646300 | -1.47664900 |
| C | -4.36961300 | 2.88856200  | 0.71560900  | C | 3.27882800  | -0.27564000 | -2.50791500 |
| H | -4.52849200 | 0.76038400  | 0.43456500  | C | 2.68692400  | -2.39462700 | -1.50323800 |
| C | -3.51130400 | 3.98677300  | 0.77265800  | C | 3.90322800  | -0.94902500 | -3.55449500 |
| H | -1.46433200 | 4.66087100  | 0.65939200  | H | 3.25947600  | 0.81236100  | -2.50104200 |
| H | -5.44054600 | 3.02482300  | 0.83714200  | C | 3.31970800  | -3.06305000 | -2.54650300 |
| H | -3.91598900 | 4.98121500  | 0.93952600  | H | 2.18265200  | -2.95667500 | -0.72107200 |

***1a-cis-RCB-2 $\alpha$  $\beta$***

|    |             |             |             |   |             |             |             |
|----|-------------|-------------|-------------|---|-------------|-------------|-------------|
| Ru | -0.20148300 | -0.68945100 | 0.77118700  | H | 4.37058900  | -0.38359600 | -4.35584200 |
| Cl | 0.52465800  | 0.17528400  | 2.94480200  | H | 3.32457700  | -4.14901200 | -2.56492900 |
| Cl | -0.60957000 | -1.92798700 | -1.26724000 | H | 4.41339500  | -2.86563100 | -4.39102800 |
| C  | -1.21435200 | -2.04086600 | 1.80327600  | C | 1.25287700  | 1.42621100  | -0.62518800 |
| C  | -2.26789100 | -0.91304000 | 1.66414700  | C | 1.29974200  | 2.56848500  | 0.19033300  |
| C  | -1.70852700 | 0.54606800  | 1.08789900  | C | 0.52616700  | 1.45647300  | -1.82562900 |
| H  | -0.88063700 | -2.19539200 | 2.82918100  | C | 0.67195700  | 3.73774200  | -0.22198200 |
|    |             |             |             | H | 1.80934900  | 2.52679300  | 1.15038300  |
|    |             |             |             | C | -0.10005500 | 2.63254400  | -2.22786300 |

|   |             |             |             |
|---|-------------|-------------|-------------|
| H | 0.43542800  | 0.55141400  | -2.42388100 |
| C | -0.02148600 | 3.77304000  | -1.43302000 |
| H | 0.71058300  | 4.61967300  | 0.41126400  |
| H | -0.67479100 | 2.64623400  | -3.14949100 |
| H | -0.52753400 | 4.68383400  | -1.74248900 |
| C | 3.37961900  | 0.22791100  | 1.00129000  |
| C | 3.64769000  | -0.51770400 | 2.15288000  |
| C | 4.28386000  | 1.21273500  | 0.58435800  |
| C | 4.80993900  | -0.27390800 | 2.88045300  |
| H | 2.93081400  | -1.26041800 | 2.49110300  |
| C | 5.43766800  | 1.45897400  | 1.32063200  |
| H | 4.08136400  | 1.79619300  | -0.31185800 |
| C | 5.70227100  | 0.71352200  | 2.46859500  |
| H | 5.01073500  | -0.85032500 | 3.77886900  |
| H | 6.12993800  | 2.23120000  | 0.99698600  |
| H | 6.60323200  | 0.90578700  | 3.04467200  |

*1b-trans-RCB-2 $\alpha\beta$*

|    |            |             |             |
|----|------------|-------------|-------------|
| Ru | 0.41883400 | -0.37571400 | 0.55418400  |
| Cl | 0.51212400 | -2.19276000 | -1.09317500 |
| Cl | 0.40914500 | 1.34573000  | 2.24010900  |
| C  | 1.34089300 | -1.54398600 | 1.84115800  |
| C  | 2.54352600 | -0.73264700 | 1.24913800  |
| C  | 2.27273100 | 0.00468600  | -0.13818300 |
| H  | 1.37357200 | -2.61096400 | 1.61181300  |
| H  | 2.48965300 | -0.67237600 | -0.96854600 |
| C  | 2.81170100 | 1.34972400  | -0.39321900 |
| C  | 3.06857700 | 1.66822600  | -1.74003700 |
| C  | 3.07972100 | 2.32440500  | 0.58162200  |
| C  | 3.55875200 | 2.91610900  | -2.10543200 |
| H  | 2.86975800 | 0.91474500  | -2.50107100 |
| C  | 3.58679100 | 3.56568000  | 0.21606000  |
| H  | 2.86268800 | 2.11803700  | 1.62475200  |
| C  | 3.82310600 | 3.87127300  | -1.12519000 |
| H  | 3.74141100 | 3.14023000  | -3.15324900 |
| H  | 3.78990200 | 4.30610100  | 0.98483900  |
| H  | 4.21172000 | 4.84722800  | -1.40343600 |
| H  | 1.17080900 | -1.29974200 | 2.89165400  |
| H  | 2.78673500 | 0.04766400  | 1.97494300  |
| C  | 3.74999200 | -1.61984800 | 0.99102900  |
| C  | 4.99250200 | -1.13855100 | 1.41107800  |
| C  | 3.67484300 | -2.85620000 | 0.34365900  |
| C  | 6.14589500 | -1.89431800 | 1.21192300  |

|   |             |             |             |
|---|-------------|-------------|-------------|
| H | 5.05391600  | -0.16794500 | 1.89966000  |
| C | 4.83120000  | -3.60456400 | 0.14188400  |
| H | 2.71539100  | -3.21707600 | -0.01867300 |
| C | 6.06817400  | -3.13162000 | 0.57811700  |
| H | 7.10388300  | -1.51170000 | 1.55319200  |
| H | 4.76238700  | -4.56533700 | -0.36129600 |
| H | 6.96598400  | -3.72288900 | 0.42048000  |
| P | -1.89396300 | -0.01330500 | -0.09399800 |
| C | -2.81394900 | -1.25165700 | -1.14907800 |
| C | -1.74868800 | 1.47753000  | -1.20120700 |
| C | -3.25830300 | 0.46453100  | 1.12203500  |
| C | -2.78752900 | -2.67853000 | -0.57987000 |
| C | -2.47977400 | -1.28684600 | -2.64503600 |
| C | -0.47111300 | 1.34949400  | -2.04286800 |
| C | -1.75763500 | 2.82568700  | -0.47486900 |
| C | -2.81784900 | 1.29201400  | 2.33203100  |
| C | -4.14112300 | -0.69316900 | 1.60967400  |
| C | -3.80220900 | -3.55735500 | -1.30208700 |
| C | -3.48154500 | -2.17921500 | -3.37647300 |
| C | -3.51739000 | -3.58857600 | -2.79891700 |
| C | -0.32627900 | 2.49581800  | -3.03393900 |
| C | -1.60218600 | 3.97657200  | -1.46700900 |
| C | -0.33977500 | 3.83448600  | -2.30803200 |
| C | -4.02327000 | 1.82446500  | 3.10125900  |
| C | -5.34281900 | -0.17247000 | 2.39509300  |
| C | -4.92757100 | 0.69504000  | 3.57274100  |
| H | -3.85046600 | -0.87304700 | -1.07686500 |
| H | -2.63074200 | 1.43990000  | -1.86355100 |
| H | -3.89082800 | 1.10333200  | 0.47716700  |
| H | -1.78109300 | -3.08230400 | -0.72143300 |
| H | -2.96864300 | -2.68804800 | 0.49908100  |
| H | -2.50668700 | -0.28219600 | -3.08238000 |
| H | -1.46251400 | -1.67308400 | -2.78000500 |
| H | -3.78344200 | -4.57016500 | -0.88373200 |
| H | -4.81943100 | -3.16958400 | -1.12996500 |
| H | -3.23846200 | -2.20612600 | -4.44479400 |
| H | -4.48489400 | -1.73202500 | -3.29943200 |
| H | -4.26244700 | -4.19800100 | -3.32332800 |
| H | -2.54362200 | -4.07060900 | -2.96536900 |
| H | 0.38330800  | 1.39081000  | -1.35006900 |
| H | -0.40712000 | 0.37566000  | -2.54109800 |
| H | -2.68737300 | 2.95406100  | 0.09151900  |
| H | -0.93381800 | 2.84845100  | 0.25388500  |



|   |             |             |             |
|---|-------------|-------------|-------------|
| H | 0.60001500  | 2.37306500  | -3.60779900 |
| H | -1.15243100 | 2.45570200  | -3.76050400 |
| H | -1.60111100 | 4.92847100  | -0.92416500 |
| H | -2.47870100 | 4.00110100  | -2.13217700 |
| H | -0.25552600 | 4.66401800  | -3.01933100 |
| H | 0.54287700  | 3.89162700  | -1.65336800 |
| H | -2.21004300 | 0.65727200  | 2.98930500  |
| H | -2.15737000 | 2.11049900  | 2.04427500  |
| H | -4.51286800 | -1.30277100 | 0.78264200  |
| H | -3.54238600 | -1.35681000 | 2.25060400  |
| H | -3.67703300 | 2.42703500  | 3.94805900  |
| H | -4.59724500 | 2.50482500  | 2.45269800  |
| H | -5.95421900 | -1.01917300 | 2.72751500  |
| H | -5.97795500 | 0.41732600  | 1.71703400  |
| H | -5.80861200 | 1.08878600  | 4.09233600  |
| H | -4.38411300 | 0.07938200  | 4.30384100  |

*Ib-cis-RCB-2 $\alpha\beta$*

|    |             |             |             |
|----|-------------|-------------|-------------|
| Ru | 0.31320300  | -0.42082600 | -0.72093700 |
| Cl | -0.33055700 | 0.74773300  | -2.79128000 |
| Cl | 0.99512100  | -1.72045900 | 1.18256900  |
| C  | 1.08793700  | -1.76776700 | -1.92078900 |
| C  | 2.27829500  | -0.76062500 | -1.79635900 |
| C  | 1.97965000  | 0.64320300  | -1.01737300 |
| H  | 0.67406300  | -1.80578800 | -2.92884100 |
| H  | 1.79737500  | 1.40391500  | -1.77972800 |
| H  | 2.32623800  | -0.34215700 | -2.80836900 |
| C  | 2.81919600  | 1.19439200  | 0.06248400  |
| C  | 2.98296600  | 2.59324600  | 0.03984100  |
| C  | 3.42154200  | 0.47779600  | 1.11112200  |
| C  | 3.70763700  | 3.25600600  | 1.02431500  |
| H  | 2.51867700  | 3.16046200  | -0.76599700 |
| C  | 4.16121600  | 1.13971100  | 2.08277000  |
| H  | 3.29140500  | -0.59562400 | 1.17347500  |
| C  | 4.30535400  | 2.52788200  | 2.05052900  |
| H  | 3.80850700  | 4.33753600  | 0.98583300  |
| H  | 4.62370100  | 0.56499700  | 2.88054700  |
| H  | 4.87693000  | 3.03719600  | 2.82180700  |
| H  | 1.27969300  | -2.73915800 | -1.46232600 |
| C  | 3.60657400  | -1.34953700 | -1.38996900 |
| C  | 4.75368700  | -0.64789600 | -1.78285800 |
| C  | 3.76095800  | -2.52885900 | -0.65824200 |
| C  | 6.02362500  | -1.10497800 | -1.44963100 |

|   |             |             |             |
|---|-------------|-------------|-------------|
| H | 4.64206200  | 0.27695700  | -2.34708600 |
| C | 5.03340700  | -2.98094600 | -0.31294400 |
| H | 2.88894600  | -3.07938300 | -0.32085700 |
| C | 6.16762500  | -2.27381300 | -0.70431800 |
| H | 6.89900300  | -0.54423900 | -1.76552300 |
| H | 5.13439100  | -3.89354800 | 0.26838500  |
| H | 7.15701500  | -2.63181300 | -0.43280900 |
| P | -1.91125800 | 0.00025500  | 0.19069300  |
| C | -1.58342200 | 1.43787100  | 1.33290400  |
| C | -2.87895100 | -1.20669900 | 1.27627100  |
| C | -3.28110300 | 0.62505100  | -0.91571700 |
| C | -0.54599000 | 2.37113300  | 0.69303900  |
| C | -1.12194100 | 1.04991900  | 2.74127300  |
| C | -2.03513900 | -2.12749500 | 2.16064800  |
| C | -3.93741700 | -2.05070400 | 0.55202600  |
| C | -3.51484000 | -0.25844000 | -2.15069000 |
| C | -3.20984000 | 2.09812400  | -1.33448900 |
| C | -0.30717600 | 3.61592200  | 1.53598000  |
| C | -0.86436700 | 2.29360700  | 3.58945100  |
| C | 0.14528300  | 3.23057100  | 2.93827000  |
| C | -2.90703300 | -2.86339700 | 3.17274900  |
| C | -4.80590800 | -2.81237000 | 1.55160000  |
| C | -3.98095400 | -3.68946300 | 2.47996200  |
| C | -4.80720400 | 0.13949300  | -2.85439600 |
| C | -4.49146100 | 2.49865800  | -2.06264700 |
| C | -4.76581700 | 1.60582600  | -3.26633900 |
| H | -2.54854800 | 1.96597900  | 1.42161300  |
| H | -3.42384500 | -0.50117700 | 1.93099700  |
| H | -4.16287800 | 0.53502600  | -0.25473000 |
| H | 0.40216400  | 1.81575200  | 0.63826500  |
| H | -0.80580400 | 2.62521400  | -0.34079100 |
| H | -1.87094200 | 0.42184000  | 3.23711000  |
| H | -0.20192600 | 0.44993400  | 2.66673700  |
| H | 0.43850900  | 4.25487200  | 1.04800700  |
| H | -1.23591400 | 4.20498000  | 1.59041800  |
| H | -0.52506500 | 1.99115700  | 4.58654500  |
| H | -1.81374400 | 2.83103000  | 3.73649700  |
| H | 0.29770700  | 4.12191100  | 3.55737800  |
| H | 1.12033100  | 2.72530300  | 2.86956700  |
| H | -1.52068200 | -2.85442000 | 1.51987400  |
| H | -1.23454600 | -1.58569200 | 2.66421200  |
| H | -4.59331500 | -1.43924600 | -0.07244000 |
| H | -3.43404900 | -2.76366800 | -0.11720800 |

|   |             |             |             |   |             |             |             |
|---|-------------|-------------|-------------|---|-------------|-------------|-------------|
| H | -2.27626100 | -3.49634000 | 3.80645400  | C | 2.99379900  | 1.32132100  | -2.43749300 |
| H | -3.38465300 | -2.13273800 | 3.84427700  | C | 6.81426000  | -1.35656300 | -0.57997900 |
| H | -5.54952800 | -3.40674700 | 1.00830400  | C | 3.87109000  | 1.24375900  | 2.55454500  |
| H | -5.37339500 | -2.08395400 | 2.15031700  | C | -1.36794000 | 1.38307200  | 2.63299200  |
| H | -4.62586900 | -4.18886900 | 3.21201400  | C | -5.51288800 | 2.78880000  | 0.16797500  |
| H | -3.50011800 | -4.48584300 | 1.89397600  | C | -0.99302100 | 3.92099600  | -1.73134400 |
| H | -2.66908600 | -0.12383100 | -2.83182600 | H | 2.68131200  | 3.98637000  | -0.32925800 |
| H | -3.53012500 | -1.32108800 | -1.88995100 | H | 3.13314200  | 3.63540900  | 1.35326800  |
| H | -3.07362400 | 2.75003000  | -0.46400500 | H | 0.86308700  | 3.84584300  | 2.12127000  |
| H | -2.34274300 | 2.24457800  | -1.98877700 | H | 0.58985300  | 4.73559000  | 0.60899100  |
| H | -4.96883200 | -0.50315800 | -3.72723000 | H | 5.15080200  | -0.28250900 | -2.44592900 |
| H | -5.66414000 | -0.02865500 | -2.18220000 | H | 5.89887200  | -0.35536200 | 1.77494400  |
| H | -4.42781100 | 3.54945400  | -2.36754600 | H | -3.99462100 | 1.65667500  | 2.11842600  |
| H | -5.33952400 | 2.43152300  | -1.36343200 | H | -3.69874600 | 3.79855000  | -1.58456800 |
| H | -5.70183500 | 1.89927400  | -3.75552100 | H | 2.50241800  | 2.28159900  | -2.25428300 |
| H | -3.96587500 | 1.74455300  | -4.00736600 | H | 3.65251800  | 1.43341200  | -3.30293800 |

**2-trans-RCB-2 $\alpha$  $\beta$**

|    |             |             |             |   |             |             |             |
|----|-------------|-------------|-------------|---|-------------|-------------|-------------|
| Ru | 0.27331400  | -0.19494700 | -0.28551100 | H | 7.10994100  | -1.38831100 | -1.63163200 |
| Cl | 1.26863700  | -0.89150900 | 1.85255200  | H | 7.68504800  | -1.04997300 | 0.00733100  |
| Cl | -0.44240500 | 0.52538900  | -2.47552800 | H | 6.57424500  | -2.38197300 | -0.27726800 |
| C  | 1.01352700  | -1.84819000 | -1.07736600 | H | 4.32309000  | 2.21850500  | 2.78171200  |
| C  | -0.46870600 | -2.26869100 | -0.84259500 | H | 2.79059600  | 1.32205700  | 2.70206900  |
| C  | -1.24574600 | -1.38410700 | 0.25598500  | H | 4.25240400  | 0.53337400  | 3.29136400  |
| H  | 1.74051100  | -2.39823700 | -0.47647200 | H | -1.99074600 | 1.49985900  | 3.52431600  |
| H  | -1.04333500 | -1.79440900 | 1.25166800  | H | -1.24140400 | 0.30757200  | 2.45939900  |
| N  | 2.27623500  | 2.01082600  | 0.29953700  | H | -0.36496800 | 1.75815800  | 2.85466300  |
| N  | 0.19378200  | 2.65617800  | 0.51028300  | H | -5.88122800 | 3.81706000  | 0.25716600  |
| C  | 0.99425000  | 1.62344500  | 0.19771300  | H | -5.86570100 | 2.40732400  | -0.79610600 |
| C  | 2.37915800  | 3.45236600  | 0.58303300  | H | -5.98623400 | 2.19436200  | 0.95393400  |
| C  | 0.96423600  | 3.79754400  | 1.02767900  | H | -0.42400900 | 4.78121000  | -1.35667700 |
| C  | 3.42540100  | 1.19467800  | 0.06202200  | H | -0.27585900 | 3.19660600  | -2.13305600 |
| C  | -1.23497100 | 2.65236100  | 0.43683900  | H | -1.61229700 | 4.27427300  | -2.55876200 |
| C  | 3.76570600  | 0.83649700  | -1.25034700 | C | -2.68168000 | -1.12813000 | 0.06591500  |
| C  | 4.87725500  | 0.00738200  | -1.43210800 | C | -3.51358600 | -1.29685500 | 1.18682000  |
| C  | 5.64804300  | -0.44211800 | -0.36147900 | C | -3.27208100 | -0.75523700 | -1.15276400 |
| C  | 5.30238700  | -0.02242800 | 0.92662800  | C | -4.88776900 | -1.10250400 | 1.09749900  |
| C  | 4.20250400  | 0.79799900  | 1.16466800  | H | -3.06547400 | -1.59578600 | 2.13325900  |
| C  | -1.99463500 | 2.06088600  | 1.45488500  | C | -4.64532300 | -0.56558400 | -1.24000400 |
| C  | -3.38876000 | 2.11537100  | 1.33835900  | H | -2.64243000 | -0.58650300 | -2.02161900 |
| C  | -4.01886800 | 2.73297600  | 0.26144700  | C | -5.45966000 | -0.73723100 | -0.11913400 |
| C  | -3.22270100 | 3.31813200  | -0.73073700 | H | -5.51210200 | -1.24267200 | 1.97644600  |
| C  | -1.83362600 | 3.29608500  | -0.66320700 | H | -5.08421700 | -0.27141500 | -2.19039200 |
|    |             |             |             | H | -6.53317500 | -0.58227100 | -0.19441900 |

|   |             |             |             |
|---|-------------|-------------|-------------|
| H | 1.25939400  | -1.76111500 | -2.13835700 |
| H | -1.01400700 | -2.15746200 | -1.78454900 |
| C | -0.56134300 | -3.69580800 | -0.33731400 |
| C | -1.41537800 | -4.57526000 | -1.00497100 |
| C | 0.15548000  | -4.14403400 | 0.77667000  |
| C | -1.53712400 | -5.89742300 | -0.57918800 |
| H | -1.98526600 | -4.22210900 | -1.86229600 |
| C | 0.02658100  | -5.46307900 | 1.20028900  |
| H | 0.79958300  | -3.45052300 | 1.31474400  |
| C | -0.81507200 | -6.34559900 | 0.52336900  |
| H | -2.20033300 | -6.57371200 | -1.11199100 |
| H | 0.58825000  | -5.80235100 | 2.06656600  |
| H | -0.90935800 | -7.37558200 | 0.85635300  |

**2-cis-RCB-2 $\alpha\beta$**

|    |             |             |             |
|----|-------------|-------------|-------------|
| Ru | 0.39156200  | 0.42642500  | -0.13415900 |
| Cl | 1.54502400  | 0.53753600  | -2.29435800 |
| Cl | -0.39156600 | 0.35642500  | 2.15787300  |
| C  | 0.80425100  | 2.35776600  | -0.01295700 |
| C  | -0.57932800 | 2.40469300  | -0.70374900 |
| C  | -1.17724500 | 0.93588200  | -1.22336800 |
| H  | 1.62281500  | 2.69975000  | -0.64689300 |
| H  | -0.94612200 | 0.87662700  | -2.29216900 |
| H  | -0.35389500 | 2.80223100  | -1.69863000 |
| N  | 2.70088600  | -1.47771200 | 0.38441700  |
| N  | 0.75862800  | -2.48960400 | 0.36422600  |
| C  | 1.37894500  | -1.30596000 | 0.21917100  |
| C  | 3.01026400  | -2.84377000 | 0.83866200  |
| C  | 1.72285500  | -3.59102100 | 0.51945500  |
| C  | 3.71183800  | -0.47510500 | 0.24412300  |
| C  | -0.65145000 | -2.71365900 | 0.28079800  |
| C  | 3.88659100  | 0.49786900  | 1.23554100  |
| C  | 4.86923600  | 1.47305800  | 1.02439200  |
| C  | 5.67089500  | 1.48294500  | -0.11401500 |
| C  | 5.48769400  | 0.47143000  | -1.06371300 |
| C  | 4.51739500  | -0.51332200 | -0.90949700 |
| C  | -1.28449400 | -2.70419400 | -0.97184100 |
| C  | -2.65990400 | -2.95243600 | -1.00699000 |
| C  | -3.39564200 | -3.21575600 | 0.14673300  |
| C  | -2.72394100 | -3.23066200 | 1.37295600  |
| C  | -1.35459100 | -2.99312700 | 1.46651500  |
| C  | 3.07073200  | 0.52691700  | 2.49018000  |
| C  | 6.70411600  | 2.54694800  | -0.32633300 |

|   |             |             |             |
|---|-------------|-------------|-------------|
| C | 4.31012000  | -1.55975200 | -1.95893400 |
| C | -0.52943100 | -2.46014700 | -2.24200900 |
| C | -4.86611300 | -3.49392200 | 0.08025100  |
| C | -0.65775700 | -3.05288800 | 2.79008000  |
| H | 3.23558400  | -2.82769700 | 1.91441000  |
| H | 3.88498100  | -3.23535000 | 0.31336800  |
| H | 1.78268100  | -4.16669300 | -0.41517800 |
| H | 1.40316400  | -4.26627400 | 1.31809800  |
| H | 5.01197600  | 2.24124300  | 1.78349200  |
| H | 6.10163000  | 0.46409400  | -1.96314900 |
| H | -3.16795300 | -2.93839200 | -1.97032900 |
| H | -3.28392800 | -3.42779800 | 2.28651100  |
| H | 2.59021300  | -0.43031100 | 2.70750300  |
| H | 3.69128100  | 0.80660900  | 3.34639600  |
| H | 2.25454100  | 1.25518200  | 2.42981900  |
| H | 6.79302400  | 3.20186900  | 0.54392100  |
| H | 7.69089800  | 2.11653800  | -0.52560800 |
| H | 6.45484200  | 3.17434900  | -1.18889100 |
| H | 4.62123700  | -2.55631600 | -1.62067800 |
| H | 3.25397700  | -1.61344300 | -2.24398200 |
| H | 4.88766300  | -1.32870900 | -2.85662000 |
| H | -1.10985200 | -2.79770700 | -3.10445900 |
| H | -0.28944100 | -1.40081700 | -2.39662300 |
| H | 0.43386200  | -2.98154500 | -2.25561200 |
| H | -5.08747600 | -4.53829100 | 0.32816300  |
| H | -5.42079000 | -2.87306100 | 0.79184700  |
| H | -5.26713800 | -3.29516600 | -0.91717600 |
| H | -0.23426600 | -4.04888400 | 2.97604400  |
| H | 0.15142400  | -2.31968700 | 2.85237500  |
| H | -1.35467800 | -2.84375300 | 3.60487600  |
| C | -2.57916000 | 0.55735000  | -0.97527800 |
| C | -3.34553600 | 0.22514100  | -2.10565000 |
| C | -3.19810900 | 0.51911400  | 0.28449400  |
| C | -4.69013600 | -0.11320600 | -1.99078200 |
| H | -2.87070800 | 0.24431700  | -3.08601500 |
| C | -4.54159200 | 0.18655400  | 0.39666200  |
| H | -2.61360400 | 0.73383700  | 1.17282000  |
| C | -5.29489200 | -0.12541700 | -0.73604600 |
| H | -5.26446800 | -0.36306900 | -2.87921800 |
| H | -5.00389600 | 0.16318000  | 1.38075400  |
| H | -6.34558000 | -0.38851800 | -0.63884900 |
| H | 0.81707400  | 2.74746300  | 1.00719800  |
| C | -1.65194600 | 3.21658300  | -0.02793300 |

|   |             |            |             |
|---|-------------|------------|-------------|
| C | -2.65265700 | 3.76261400 | -0.84121300 |
| C | -1.71566500 | 3.43312900 | 1.34995500  |
| C | -3.69441000 | 4.50436500 | -0.29536100 |
| H | -2.61703100 | 3.58763300 | -1.91575800 |
| C | -2.76337600 | 4.17066400 | 1.89878600  |
| H | -0.96888900 | 2.99449600 | 2.00467300  |
| C | -3.75486100 | 4.70834400 | 1.08223400  |
| H | -4.46136400 | 4.91716200 | -0.94526200 |
| H | -2.80261900 | 4.32135600 | 2.97436400  |
| H | -4.56944500 | 5.28259800 | 1.51534300  |

**1a-trans,trans-RCB-3**

|    |             |             |             |
|----|-------------|-------------|-------------|
| Cl | -0.14597200 | -0.07827300 | 2.57354600  |
| Cl | -0.14000900 | -0.55095400 | -2.28160500 |
| C  | -1.79134600 | -1.48357800 | 0.38638100  |
| C  | -2.01229700 | -2.69570900 | -0.41799400 |
| C  | -1.64783800 | -3.92107200 | 0.16724500  |
| C  | -1.81558100 | -5.12127000 | -0.51344600 |
| C  | -2.37182800 | -5.12443800 | -1.79153500 |
| C  | -2.74938600 | -3.91759500 | -2.37970400 |
| C  | -2.56630900 | -2.71593300 | -1.70657500 |
| C  | -2.50164300 | -0.12830300 | -0.00481200 |
| C  | -1.66045400 | 1.17698100  | 0.32325900  |
| H  | -1.89622300 | -1.67782700 | 1.45847800  |
| H  | -1.22742400 | -3.91564800 | 1.17184800  |
| H  | -1.52183100 | -6.05541800 | -0.04206000 |
| H  | -2.51439400 | -6.06072100 | -2.32423000 |
| H  | -3.18375200 | -3.91127100 | -3.37574500 |
| H  | -2.84229900 | -1.78725700 | -2.19661200 |
| H  | -1.78310400 | 1.45185900  | 1.37416500  |
| H  | -2.72780500 | -0.13430400 | -1.07323900 |
| C  | -1.74575900 | 2.34903600  | -0.55882400 |
| C  | -1.65292000 | 3.61521800  | 0.04470200  |
| C  | -1.91314000 | 2.28620300  | -1.95275600 |
| C  | -1.72443300 | 4.77867300  | -0.71389000 |
| H  | -1.51891100 | 3.67239700  | 1.12331900  |
| C  | -1.98969800 | 3.44928800  | -2.70732500 |
| H  | -1.94896900 | 1.31985500  | -2.44727700 |
| C  | -1.89504900 | 4.70034400  | -2.09425700 |
| H  | -1.64733800 | 5.74705700  | -0.22581700 |
| H  | -2.11961800 | 3.38036100  | -3.78403000 |
| H  | -1.95419600 | 5.60693800  | -2.69074900 |
| C  | -3.79432900 | -0.04051000 | 0.79057400  |
| C  | -4.99506700 | -0.00567800 | 0.08077600  |

|   |             |             |             |
|---|-------------|-------------|-------------|
| C | -3.81491600 | -0.00204200 | 2.18789300  |
| C | -6.21022900 | 0.06750600  | 0.76056600  |
| H | -4.97705500 | -0.03581700 | -1.00696000 |
| C | -5.03055100 | 0.07083300  | 2.86088500  |
| H | -2.87668200 | -0.02992500 | 2.74090300  |
| C | -6.23116600 | 0.10591700  | 2.15157500  |
| H | -7.13893500 | 0.09420700  | 0.19706700  |
| H | -5.03855700 | 0.10015500  | 3.94708800  |
| H | -7.17753900 | 0.16340600  | 2.68210100  |
| C | 2.03561200  | 1.71713100  | 0.03631100  |
| C | 3.04978200  | -0.50009800 | 1.69128300  |
| C | 3.11378200  | -0.72802100 | -1.14771200 |
| C | 1.97703700  | 2.53524200  | 1.17488900  |
| C | 1.90151200  | 2.28458600  | -1.24088600 |
| C | 4.19294000  | 0.23566600  | 2.02212500  |
| C | 2.71024700  | -1.62992000 | 2.44182600  |
| C | 2.82339300  | -1.96737500 | -1.72665700 |
| C | 4.25584300  | -0.02507500 | -1.54966200 |
| C | 1.83683000  | 3.91111000  | 1.02976100  |
| H | 2.02566800  | 2.08686200  | 2.16456800  |
| C | 1.75281200  | 3.66135800  | -1.37348300 |
| H | 1.89283800  | 1.64319900  | -2.11973900 |
| C | 4.98120700  | -0.14898400 | 3.10322500  |
| H | 4.46326200  | 1.11579400  | 1.44189100  |
| C | 3.50782000  | -2.01734200 | 3.51394900  |
| H | 1.80378000  | -2.18081100 | 2.20246200  |
| C | 3.67083700  | -2.49639300 | -2.69643300 |
| H | 1.92093500  | -2.50215800 | -1.43873700 |
| C | 5.09482000  | -0.55430800 | -2.52537100 |
| H | 4.48467100  | 0.94326900  | -1.10871000 |
| C | 1.72776200  | 4.47413300  | -0.24189500 |
| H | 1.79885200  | 4.54294200  | 1.91270900  |
| H | 1.63863300  | 4.09682600  | -2.36205800 |
| C | 4.64034200  | -1.27653600 | 3.84784700  |
| H | 5.86133100  | 0.43264900  | 3.36235000  |
| H | 3.23473700  | -2.89058400 | 4.09899300  |
| C | 4.80411100  | -1.79133700 | -3.09729600 |
| H | 3.43573100  | -3.45543400 | -3.14900400 |
| H | 5.97427000  | 0.00114500  | -2.83882700 |
| H | 1.60363700  | 5.54845300  | -0.35050900 |
| H | 5.25543300  | -1.57515800 | 4.69216300  |
| H | 5.45874500  | -2.20387200 | -3.86006900 |
| P | 2.08069600  | -0.08800400 | 0.20924900  |

Ru -0.24734500 -0.23364800 0.10625400

H -4.64886500 0.98223100 -1.79962300

C -5.14414700 0.42988700 1.99195200

H -3.00753200 0.58518900 2.15044500

C -6.25166600 0.43711000 1.14731500

H -6.92508600 0.64849000 -0.88986800

H -5.27323000 0.26388900 3.05818600

H -7.24867400 0.28102200 1.54976700

C 2.64390100 0.84635600 0.81118900

C 2.32255800 -2.05163900 1.18449900

C 2.93270900 -1.04729900 -1.40668400

C 2.66170000 1.00958200 2.20308400

C 3.03155900 1.90685100 -0.02260300

C 3.57022300 -2.15445100 1.81035500

C 1.38630900 -3.07959300 1.33257300

C 2.32061500 -1.71590500 -2.47209600

C 4.30558000 -0.78206200 -1.45331600

C 3.10767200 2.20814400 2.75285900

H 2.31002300 0.20694800 2.84723200

C 3.47570700 3.09973100 0.53712800

H 2.96474100 1.79804200 -1.10289600

C 3.87188800 -3.26945600 2.58686600

H 4.30378200 -1.35820800 1.69756000

C 1.69657300 -4.19821100 2.10048300

H 0.40638600 -2.98756700 0.86852400

C 3.07539000 -2.11530600 -3.57015700

H 1.24799900 -1.89731400 -2.45042300

C 5.05531800 -1.17471800 -2.55907600

H 4.78970200 -0.25865300 -0.63133400

C 3.51968100 3.24939700 1.92290600

H 3.12402600 2.32957300 3.83236100

H 3.76836500 3.92102900 -0.11110900

C 2.93585200 -4.29248100 2.73060200

H 4.83838700 -3.33916800 3.07831900

H 0.96209300 -4.98964700 2.21792700

C 4.44158300 -1.84318400 -3.61643400

H 2.59171500 -2.62659000 -4.39727700

H 6.11908800 -0.95649700 -2.59306400

H 3.86131400 4.18616300 2.35578900

H 3.17245600 -5.16207800 3.33736400

H 5.02735400 -2.14676800 -4.47954700

P 1.94610100 -0.65881100 0.07256800

*1a-trans, cis-RCB-3*

Ru -0.29566800 0.07950400 -0.17807600

Cl 0.37698500 0.93983500 -2.35799000

Cl -0.58401900 -0.55999700 2.17467000

C -1.85727600 -0.54804400 -1.15647700

C -2.71286000 -1.71554400 -0.88973200

C -3.31583100 -2.32203300 -2.00618500

C -4.16461400 -3.41350400 -1.86018800

C -4.43018600 -3.91806000 -0.58884200

C -3.82840600 -3.33478100 0.52713600

C -2.97223500 -2.25038900 0.38261000

C -2.32122300 1.01831500 -0.51904600

C -1.30887800 1.76969300 0.32779600

H -1.77694200 -0.36054000 -2.23404300

H -3.12064300 -1.91251100 -2.99583700

H -4.62362500 -3.86438400 -2.73588100

H -5.09876400 -4.76632800 -0.46766200

H -4.02589100 -3.73087500 1.51975100

H -2.48886800 -1.81187000 1.25053100

H -1.51708200 1.69904600 1.39713800

C -0.76892900 3.09219300 -0.01903700

C -0.11618700 3.78623600 1.01440300

C -0.86673200 3.70597300 -1.27683500

C 0.43578600 5.04325000 0.79805300

H -0.03659700 3.31358600 1.99266800

C -0.32021200 4.96466600 -1.49031500

H -1.35487100 3.18878500 -2.09632300

C 0.33643300 5.63768800 -0.45820200

H 0.94408500 5.55701800 1.60997800

H -0.40556800 5.42549000 -2.47056700

H 0.76123200 6.62256500 -0.63321800

H -2.39186200 1.52452200 -1.48584200

C -3.67462100 0.83720400 0.11421000

C -4.79060400 0.83821900 -0.72933800

C -3.86375000 0.62962600 1.48295200

C -6.07054600 0.64356200 -0.21869800

**1a-cis, cis-RCB-3**

|    |             |             |             |
|----|-------------|-------------|-------------|
| Ru | 0.22128200  | 0.03891500  | -0.42776900 |
| Cl | -0.65594600 | -0.10447700 | -2.75323600 |
| Cl | 0.74937000  | 0.15000400  | 1.89422600  |
| C  | 1.52012100  | -1.28559800 | -1.16799700 |
| C  | 1.98336100  | -2.47400600 | -0.43477400 |
| C  | 1.81234000  | -3.70344700 | -1.09997900 |
| C  | 2.19992900  | -4.90309400 | -0.51509100 |
| C  | 2.78083200  | -4.89812200 | 0.75109600  |
| C  | 2.95578500  | -3.68810500 | 1.42503500  |
| C  | 2.55452600  | -2.48974500 | 0.84972300  |
| C  | 2.32921900  | 0.11619100  | -1.20856100 |
| C  | 1.39276600  | 1.42455400  | -1.21849400 |
| H  | 1.24595300  | -1.55192300 | -2.19146700 |
| H  | 1.37230100  | -3.70252700 | -2.09646000 |
| H  | 2.05644400  | -5.83833100 | -1.04975000 |
| H  | 3.09389300  | -5.83075900 | 1.21288000  |
| H  | 3.40122700  | -3.67831700 | 2.41613700  |
| H  | 2.66209200  | -1.56363100 | 1.40305000  |
| H  | 1.12066600  | 1.62281500  | -2.26093700 |
| C  | 1.87322200  | 2.66895300  | -0.55787200 |
| C  | 2.97287800  | 3.32294000  | -1.13410400 |
| C  | 1.25837600  | 3.24635600  | 0.55750600  |
| C  | 3.47105600  | 4.49911500  | -0.58722300 |
| H  | 3.45486900  | 2.88380000  | -2.00607400 |
| C  | 1.74985200  | 4.43434300  | 1.09687500  |
| H  | 0.40644800  | 2.74893500  | 1.01566100  |
| C  | 2.86074700  | 5.05857600  | 0.53463900  |
| H  | 4.33636500  | 4.97911400  | -1.03655000 |
| H  | 1.26259200  | 4.86793400  | 1.96620000  |
| H  | 3.24579600  | 5.97949300  | 0.96389000  |
| H  | 2.54862600  | 0.07761600  | -2.28123100 |
| C  | 3.62693400  | 0.12335800  | -0.44928300 |
| C  | 4.68857100  | -0.57109700 | -1.04479900 |
| C  | 3.84388900  | 0.74155200  | 0.78648100  |
| C  | 5.93104400  | -0.65879200 | -0.42665400 |
| H  | 4.52946800  | -1.06268300 | -2.00405300 |
| C  | 5.08796100  | 0.65094300  | 1.40738100  |
| H  | 3.03677900  | 1.26805500  | 1.28177900  |
| C  | 6.13392000  | -0.04776000 | 0.80917200  |
| H  | 6.73665600  | -1.20597900 | -0.90836400 |
| H  | 5.23474000  | 1.13176300  | 2.37078400  |
| H  | 7.10049400  | -0.11505200 | 1.30116500  |

|   |             |             |             |
|---|-------------|-------------|-------------|
| C | -2.64506400 | 0.58548900  | 1.70423600  |
| C | -3.17051400 | 0.94413700  | -1.08492900 |
| C | -2.67723500 | -1.74928600 | 0.01414000  |
| C | -3.29855900 | 1.81267800  | 1.86420700  |
| C | -2.32504900 | -0.17384300 | 2.83959600  |
| C | -4.44849200 | 0.51213800  | -1.44302900 |
| C | -2.69535300 | 2.17386800  | -1.55504800 |
| C | -1.98071000 | -2.67940900 | -0.76859000 |
| C | -3.78553400 | -2.17312200 | 0.76240900  |
| C | -3.63958200 | 2.26533900  | 3.13777800  |
| H | -3.55458500 | 2.41450300  | 0.99616100  |
| C | -2.67571600 | 0.27750900  | 4.10578500  |
| H | -1.79780200 | -1.11760700 | 2.72768400  |
| C | -5.24655800 | 1.30655800  | -2.26491000 |
| H | -4.81781100 | -0.44938100 | -1.09354200 |
| C | -3.49988300 | 2.96967400  | -2.36220700 |
| H | -1.68335700 | 2.49211100  | -1.30637300 |
| C | -2.38291000 | -4.01236800 | -0.79310700 |
| H | -1.13720900 | -2.35140300 | -1.37165400 |
| C | -4.18897500 | -3.50410100 | 0.72331500  |
| H | -4.32767100 | -1.46177800 | 1.38133800  |
| C | -3.33177300 | 1.49921800  | 4.25816400  |
| H | -4.15164700 | 3.21704900  | 3.24932300  |
| H | -2.42499000 | -0.32104400 | 4.97667800  |
| C | -4.77613000 | 2.53542300  | -2.72035700 |
| H | -6.23546300 | 0.95964100  | -2.55180600 |
| H | -3.12320900 | 3.92077300  | -2.72706100 |
| C | -3.48494000 | -4.42672700 | -0.04957400 |
| H | -1.82768500 | -4.72669800 | -1.39494600 |
| H | -5.05085400 | -3.82111800 | 1.30370800  |
| H | -3.60101600 | 1.85204900  | 5.25006400  |
| H | -5.39937200 | 3.15176000  | -3.36209400 |
| H | -3.79484800 | -5.46785200 | -0.06856100 |
| P | -2.12590900 | -0.01128600 | 0.05824500  |

**1b-trans ,trans-RCB-3**

|    |             |             |             |
|----|-------------|-------------|-------------|
| Ru | -0.42979000 | -0.07465600 | 0.06933300  |
| Cl | -0.40287900 | -0.07089400 | 2.56100600  |
| Cl | -0.34982800 | -0.00400900 | -2.33827400 |
| C  | -1.65962700 | -1.63710900 | 0.28759500  |
| C  | -1.50696000 | -2.81926100 | -0.57418000 |
| C  | -0.89738700 | -3.94515000 | 0.00804300  |

|   |             |             |             |   |            |             |             |
|---|-------------|-------------|-------------|---|------------|-------------|-------------|
| C | -0.66640500 | -5.09960400 | -0.72998300 | H | 5.83639400 | -0.71209000 | 3.17398300  |
| C | -1.05830100 | -5.15970800 | -2.06648300 | H | 4.31287600 | -0.24208000 | 3.91780500  |
| C | -1.68222100 | -4.05733800 | -2.65153000 | C | 4.37275700 | -2.30766100 | 3.30293700  |
| C | -1.90122500 | -2.89762500 | -1.91860500 | H | 4.72054000 | -2.66560300 | 4.27862000  |
| C | -2.65058600 | -0.46522900 | -0.08406800 | H | 4.89521900 | -2.91391000 | 2.54761700  |
| C | -2.12536200 | 0.97516200  | 0.32221100  | C | 2.86826500 | -2.51815700 | 3.15961200  |
| H | -1.76247300 | -1.90599100 | 1.34377900  | H | 2.61805200 | -3.58032700 | 3.26250300  |
| H | -0.60153300 | -3.89678500 | 1.05470800  | H | 2.34208400 | -1.99532200 | 3.97099900  |
| H | -0.18746100 | -5.95469400 | -0.26060600 | C | 2.35111700 | -1.98658800 | 1.82672000  |
| H | -0.88379500 | -6.06078300 | -2.64809700 | H | 1.26253800 | -2.10048400 | 1.76581400  |
| H | -1.99425600 | -4.09859800 | -3.69141600 | H | 2.78912000 | -2.56873400 | 1.00411900  |
| H | -2.35812100 | -2.03981700 | -2.40198900 | C | 2.14362800 | 2.14621000  | 0.46318100  |
| H | -2.30709700 | 1.16051500  | 1.38473800  | H | 3.23240900 | 2.31586900  | 0.42226800  |
| H | -2.83997900 | -0.48156200 | -1.15927800 | C | 1.63262700 | 2.68359100  | 1.80178100  |
| C | -2.43193700 | 2.15329700  | -0.50116600 | H | 2.10043200 | 2.15531300  | 2.64077500  |
| C | -2.30495300 | 3.40803300  | 0.12191900  | H | 0.55650000 | 2.47832100  | 1.88680200  |
| C | -2.81428700 | 2.11822000  | -1.85109900 | C | 1.89342400 | 4.18259200  | 1.90609200  |
| C | -2.51804500 | 4.58640100  | -0.58378600 | H | 1.52499300 | 4.55653800  | 2.86795000  |
| H | -2.02177900 | 3.44157900  | 1.17320400  | H | 2.97900900 | 4.36502700  | 1.89973100  |
| C | -3.04471900 | 3.29592800  | -2.55060200 | C | 1.24736400 | 4.93951900  | 0.75245700  |
| H | -2.90443100 | 1.16684200  | -2.36477400 | H | 0.15544700 | 4.82876500  | 0.81882400  |
| C | -2.88860400 | 4.53436900  | -1.92653000 | H | 1.45648900 | 6.01273400  | 0.82879100  |
| H | -2.40116600 | 5.54499800  | -0.08449400 | C | 1.71645600 | 4.39939000  | -0.59304600 |
| H | -3.33966500 | 3.24837900  | -3.59512900 | H | 2.79013600 | 4.60976800  | -0.71639100 |
| H | -3.06197600 | 5.45191400  | -2.48219100 | H | 1.20274300 | 4.91137600  | -1.41481200 |
| C | -3.95307800 | -0.69233900 | 0.66623200  | C | 1.48699700 | 2.89694800  | -0.70478500 |
| C | -5.11433600 | -0.86088300 | -0.08918900 | H | 1.85256700 | 2.52426000  | -1.66938100 |
| C | -4.02385800 | -0.73336800 | 2.06169800  | H | 0.40434900 | 2.68934300  | -0.70035600 |
| C | -6.33940700 | -1.06964600 | 0.54222400  | C | 2.80374100 | -0.06080900 | -1.33106300 |
| H | -5.05734800 | -0.82960600 | -1.17563700 | H | 2.12394500 | 0.37325300  | -2.07723800 |
| C | -5.24978500 | -0.94120600 | 2.68672800  | C | 4.17637300 | 0.58903500  | -1.53326700 |
| H | -3.11701600 | -0.59983000 | 2.65051500  | H | 4.90525000 | 0.19083200  | -0.81628300 |
| C | -6.41044800 | -1.10953200 | 1.93153000  | H | 4.12711700 | 1.67119800  | -1.36250800 |
| H | -7.23663300 | -1.20006300 | -0.05682300 | C | 4.67190000 | 0.32523600  | -2.95409100 |
| H | -5.29750400 | -0.97068000 | 3.77184800  | H | 3.99581800 | 0.82415300  | -3.66378100 |
| H | -7.36474000 | -1.27029800 | 2.42515500  | H | 5.65960600 | 0.77963400  | -3.09419900 |
| P | 1.91044000  | 0.32334200  | 0.24726700  | C | 4.71438400 | -1.16610000 | -3.26548500 |
| C | 2.72222000  | -0.50525200 | 1.68176600  | H | 5.05511900 | -1.33193700 | -4.29383500 |
| H | 2.25528700  | 0.00837000  | 2.53458300  | H | 5.45746100 | -1.64894400 | -2.61266300 |
| C | 4.23891400  | -0.31857400 | 1.76915500  | C | 3.35313400 | -1.81315400 | -3.04148000 |
| H | 4.52157100  | 0.73423300  | 1.63582900  | H | 3.39787100 | -2.88985500 | -3.24047700 |
| H | 4.72471500  | -0.87965400 | 0.95725900  | H | 2.62289800 | -1.39489200 | -3.74844400 |
| C | 4.75018500  | -0.84371000 | 3.10772200  | C | 2.85177100 | -1.56497000 | -1.62243800 |

H 1.85661800 -2.01095500 -1.48540900  
H 3.52965300 -2.05735700 -0.90849500

*1b-trans,cis-RCB-3*

Ru 0.40834300 0.23633400 0.12907400  
Cl -0.25779000 1.12614800 2.31707100  
Cl 0.84984400 -0.38037600 -2.19423700  
C 1.83344700 -0.58571600 1.19594400  
C 2.37190100 -1.92917600 0.92036100  
C 2.38438400 -2.81760300 2.01066000  
C 2.81152800 -4.13334600 1.86479900  
C 3.25056100 -4.58512100 0.62234000  
C 3.24619500 -3.71418600 -0.46897800  
C 2.80291200 -2.40569700 -0.32960400  
C 2.53447600 0.82751300 0.62682100  
C 1.64435000 1.80349900 -0.17704000  
H 1.69093900 -0.43474400 2.27090900  
H 2.04916100 -2.45921900 2.98246200  
H 2.80738800 -4.80139500 2.72174400  
H 3.59188500 -5.61002500 0.50267500  
H 3.58203700 -4.06111800 -1.44259600  
H 2.76520600 -1.75484500 -1.19560100  
H 1.87839000 1.79630000 -1.24463700  
C 1.33294200 3.16563000 0.28438300  
C 0.76981400 4.03203200 -0.66946500  
C 1.53668600 3.65458900 1.58248300  
C 0.39263900 5.32749600 -0.33405300  
H 0.61998600 3.66340800 -1.68428400  
C 1.17665700 4.95460500 1.91410800  
H 1.95460600 3.00688700 2.34690000  
C 0.59638000 5.79471100 0.96299900  
H -0.05191400 5.97413900 -1.08662300  
H 1.34149200 5.31342900 2.92631400  
H 0.31109500 6.80826600 1.23092200  
H 2.66887100 1.30631700 1.60151900  
C 3.87642600 0.51593000 0.00923300  
C 4.91533100 0.17961900 0.88546800  
C 4.13517200 0.52913100 -1.36340200  
C 6.18374400 -0.13172700 0.40762500

H 4.71851100 0.15408000 1.95647900  
C 5.40314700 0.20680700 -1.84276500  
H 3.33956900 0.75343500 -2.06744300  
C 6.43185000 -0.12159500 -0.96354000  
H 6.97575000 -0.38661600 1.10666600  
H 5.58417800 0.21414800 -2.91431400  
H 7.41962800 -0.36815200 -1.34320200  
P -1.89477400 -0.31948700 -0.23994600  
C -1.98924800 -1.82685900 -1.30363500  
H -1.57329100 -1.45685800 -2.25430000  
C -3.38413200 -2.39580700 -1.56450200  
H -4.08474000 -1.61074600 -1.87907500  
H -3.78466000 -2.81981500 -0.63175200  
C -3.30712800 -3.49637600 -2.62152900  
H -4.30440900 -3.91299900 -2.80439500  
H -2.97614400 -3.05264600 -3.57174500  
C -2.33252000 -4.59608400 -2.21165200  
H -2.26554000 -5.35695300 -2.99760900  
H -2.72641700 -5.10743400 -1.32034700  
C -0.95241500 -4.02994300 -1.89169400  
H -0.27636000 -4.82382300 -1.55376200  
H -0.50270200 -3.60494100 -2.80071200  
C -1.03605200 -2.93648000 -0.83354500  
H -0.03881000 -2.52395200 -0.63691500  
H -1.39683600 -3.37106200 0.10856700  
C -2.72983500 1.07083900 -1.13460200  
H -3.78103300 0.75985400 -1.25911300  
C -2.15079900 1.34764300 -2.52340600  
H -2.16903900 0.44537600 -3.14620200  
H -1.08933500 1.61543400 -2.42604700  
C -2.90722500 2.48499000 -3.20101100  
H -2.48699200 2.66810200 -4.19624000  
H -3.95475200 2.18562500 -3.35774600  
C -2.86502800 3.75221700 -2.35626800  
H -1.82247300 4.09410800 -2.27561600  
H -3.42015200 4.56155700 -2.84418100  
C -3.41211300 3.49661000 -0.95738100  
H -4.48589800 3.26324100 -1.02493700  
H -3.32856200 4.39772100 -0.33902400  
C -2.68934000 2.34191700 -0.27308600  
H -3.11821600 2.16113600 0.71997300  
H -1.63803600 2.61427800 -0.09116200  
C -2.88480400 -0.53391100 1.30436200



|   |             |             |            |
|---|-------------|-------------|------------|
| H | -2.58614200 | 0.34992700  | 1.88518300 |
| C | -4.41177900 | -0.50734600 | 1.17190900 |
| H | -4.76915800 | -1.38522800 | 0.61701400 |
| H | -4.74396600 | 0.37490200  | 0.61108800 |
| C | -5.04287700 | -0.49871900 | 2.56326600 |
| H | -4.76069700 | 0.43362300  | 3.07392500 |
| H | -6.13565700 | -0.48775600 | 2.47782400 |
| C | -4.58082600 | -1.68798400 | 3.39808300 |
| H | -5.03077900 | -1.64985700 | 4.39666000 |
| H | -4.94346000 | -2.61655400 | 2.93146600 |
| C | -3.06005500 | -1.73911300 | 3.49610200 |
| H | -2.73990000 | -2.61789200 | 4.06724400 |
| H | -2.69301200 | -0.85902700 | 4.04242700 |
| C | -2.42458800 | -1.75184500 | 2.11133000 |
| H | -1.32837300 | -1.75953500 | 2.18956400 |
| H | -2.72026100 | -2.67344400 | 1.58711600 |

*1b-cis,cis-RCB-3*

|    |             |             |             |
|----|-------------|-------------|-------------|
| Ru | 0.33702300  | -0.06533100 | -0.44411000 |
| Cl | -0.38302900 | 0.14087500  | -2.82078500 |
| Cl | 0.77360500  | -0.32975100 | 1.91435100  |
| C  | 1.38810800  | -1.59032400 | -1.18287600 |
| C  | 1.56938300  | -2.87533800 | -0.48625400 |
| C  | 1.04107200  | -3.99778300 | -1.15323900 |
| C  | 1.11109100  | -5.26973300 | -0.59756000 |
| C  | 1.72745100  | -5.45194400 | 0.63864800  |
| C  | 2.26003900  | -4.35099400 | 1.31096600  |
| C  | 2.17534700  | -3.07648900 | 0.76527600  |
| C  | 2.44849400  | -0.37416300 | -1.17562400 |
| C  | 1.79805800  | 1.11018400  | -1.12150600 |
| H  | 1.08086900  | -1.76540200 | -2.21710400 |
| H  | 0.57035500  | -3.85475000 | -2.12457400 |
| H  | 0.69125900  | -6.11749900 | -1.13230800 |
| H  | 1.79301100  | -6.44418000 | 1.07695800  |
| H  | 2.73704100  | -4.48411300 | 2.27809700  |
| H  | 2.55573700  | -2.22876600 | 1.32003400  |
| H  | 1.61012800  | 1.38902100  | -2.16134700 |
| C  | 2.41508600  | 2.27015400  | -0.43209000 |
| C  | 3.00089600  | 3.23823100  | -1.26905500 |
| C  | 2.37351700  | 2.53658400  | 0.94597900  |
| C  | 3.54951400  | 4.40739600  | -0.75374200 |
| H  | 3.02030200  | 3.06003600  | -2.34251400 |

|   |             |             |             |
|---|-------------|-------------|-------------|
| C | 2.90901300  | 3.71285500  | 1.45991300  |
| H | 1.88799400  | 1.82878400  | 1.61149000  |
| C | 3.50283200  | 4.65153100  | 0.61707100  |
| H | 4.00136300  | 5.13253300  | -1.42504400 |
| H | 2.85254100  | 3.90031600  | 2.52925000  |
| H | 3.91508700  | 5.57075300  | 1.02423200  |
| H | 2.64637700  | -0.38611800 | -2.25255500 |
| C | 3.74234100  | -0.63423400 | -0.45645200 |
| C | 4.72250700  | -1.32699300 | -1.17902500 |
| C | 4.03075800  | -0.25461600 | 0.85694700  |
| C | 5.95482200  | -1.63385400 | -0.61083900 |
| H | 4.50871300  | -1.63690900 | -2.20114100 |
| C | 5.26502300  | -0.55920200 | 1.42637900  |
| H | 3.27494400  | 0.24018900  | 1.45321400  |
| C | 6.23213700  | -1.24782300 | 0.69870100  |
| H | 6.69664900  | -2.17475200 | -1.19217600 |
| H | 5.46553500  | -0.25855700 | 2.45134700  |
| H | 7.19298200  | -1.48375000 | 1.14796700  |
| P | -1.99041100 | 0.33177200  | 0.04672400  |
| C | -3.16213000 | -0.29889300 | -1.23305000 |
| H | -2.88347700 | 0.29784300  | -2.11459400 |
| C | -4.64583800 | -0.06861300 | -0.93671100 |
| H | -4.83705000 | 0.96789500  | -0.62798900 |
| H | -4.95601000 | -0.70924000 | -0.09805000 |
| C | -5.48103100 | -0.42110300 | -2.16523100 |
| H | -6.54504700 | -0.26053200 | -1.95576800 |
| H | -5.21730400 | 0.26452600  | -2.98356300 |
| C | -5.23078700 | -1.85858200 | -2.60841000 |
| H | -5.81012300 | -2.08607900 | -3.51051900 |
| H | -5.59693100 | -2.54136100 | -1.82677900 |
| C | -3.74649800 | -2.11977400 | -2.84372900 |
| H | -3.58125500 | -3.16749300 | -3.11982000 |
| H | -3.39200000 | -1.51556600 | -3.69101200 |
| C | -2.91605700 | -1.76534100 | -1.61491400 |
| H | -1.85029700 | -1.93005800 | -1.81100200 |
| H | -3.20008300 | -2.42280500 | -0.78195600 |
| C | -2.17377300 | 2.17541300  | 0.10129100  |
| H | -3.23080500 | 2.38024900  | 0.34155200  |
| C | -1.84243900 | 2.85201400  | -1.23249300 |
| H | -2.47004500 | 2.45664600  | -2.03994600 |
| H | -0.81005400 | 2.60200700  | -1.51477500 |
| C | -1.98848400 | 4.36577500  | -1.12420500 |
| H | -1.75000300 | 4.82790200  | -2.08863300 |

|   |             |             |             |
|---|-------------|-------------|-------------|
| H | -3.03770600 | 4.62064700  | -0.91004600 |
| C | -1.09715400 | 4.92660800  | -0.02272000 |
| H | -0.04311500 | 4.74346300  | -0.27975800 |
| H | -1.21377900 | 6.01356000  | 0.05387800  |
| C | -1.40587100 | 4.26185000  | 1.31250300  |
| H | -2.42708800 | 4.52738300  | 1.62666000  |
| H | -0.73423400 | 4.63363300  | 2.09528500  |
| C | -1.28988200 | 2.74512100  | 1.22000700  |
| H | -1.52510400 | 2.28491100  | 2.18750300  |
| H | -0.24422800 | 2.47335800  | 1.00782300  |
| C | -2.50665000 | -0.22917200 | 1.73401200  |
| H | -1.64980300 | 0.09358300  | 2.34199100  |
| C | -3.76190600 | 0.41028100  | 2.33888700  |
| H | -4.66099400 | 0.08876500  | 1.79781100  |
| H | -3.72598100 | 1.50371100  | 2.26197000  |
| C | -3.88641200 | 0.00120500  | 3.80521000  |
| H | -3.02921400 | 0.40821900  | 4.36149000  |
| H | -4.78445900 | 0.45073800  | 4.24494500  |
| C | -3.91342400 | -1.51548600 | 3.96053900  |
| H | -3.98082200 | -1.78972500 | 5.01942600  |
| H | -4.82341300 | -1.90792300 | 3.48180000  |
| C | -2.69159200 | -2.16208100 | 3.31740500  |
| H | -2.74302600 | -3.25329100 | 3.40276200  |
| H | -1.78272900 | -1.84964500 | 3.85076200  |
| C | -2.55950800 | -1.75568700 | 1.85380300  |
| H | -1.66100500 | -2.20662500 | 1.40972600  |
| H | -3.42467400 | -2.13853200 | 1.29147800  |

**2-trans,trans-RCB-3**

|    |             |             |             |
|----|-------------|-------------|-------------|
| Ru | 0.01927500  | -0.02123200 | -0.07123200 |
| Cl | 0.76481100  | 0.03924900  | -2.43748300 |
| Cl | -0.61315800 | -0.27256300 | 2.24283400  |
| C  | 1.17157800  | 1.62525500  | 0.10958600  |
| C  | 2.06638800  | 1.85168200  | 1.25447700  |
| C  | 3.44656300  | 1.75259200  | 1.00909500  |
| C  | 4.37226700  | 1.93726000  | 2.02943100  |
| C  | 3.93701400  | 2.24016900  | 3.31801500  |
| C  | 2.56946100  | 2.35613500  | 3.57341900  |
| C  | 1.64273000  | 2.16068800  | 2.55740800  |
| C  | -0.27667100 | 2.23359600  | 0.09738000  |
| C  | -1.33598500 | 1.34680200  | -0.68093700 |
| H  | 1.67666000  | 1.81312300  | -0.84199500 |
| H  | 3.78163700  | 1.51046400  | 0.00132800  |

|   |             |             |             |
|---|-------------|-------------|-------------|
| H | 5.43551100  | 1.84888100  | 1.81710900  |
| H | 4.65698200  | 2.39061700  | 4.11790300  |
| H | 2.22265600  | 2.59531800  | 4.57511600  |
| H | 0.58282100  | 2.22331600  | 2.78180900  |
| H | -1.22300400 | 1.49970800  | -1.75881300 |
| H | -0.63027600 | 2.37391600  | 1.12228000  |
| N | 1.42176000  | -2.67657700 | -0.45849600 |
| N | -0.75536800 | -2.87587100 | -0.31190400 |
| C | 0.26920200  | -2.00407500 | -0.29765400 |
| C | 1.20261500  | -4.13223000 | -0.45390100 |
| C | -0.30552500 | -4.23867400 | -0.63427800 |
| C | 2.74849800  | -2.14266300 | -0.50309900 |
| C | -2.12669900 | -2.57753700 | -0.02929900 |
| C | 3.36867100  | -1.72075200 | 0.68434000  |
| C | 4.69040600  | -1.27785800 | 0.60649700  |
| C | 5.38581800  | -1.22548700 | -0.60134200 |
| C | 4.73993600  | -1.67082000 | -1.75638300 |
| C | 3.42950400  | -2.14988100 | -1.73166400 |
| C | -2.94058300 | -2.01793100 | -1.02446600 |
| C | -4.28044600 | -1.77514300 | -0.70583800 |
| C | -4.81059100 | -2.07484100 | 0.54713100  |
| C | -3.96710200 | -2.64221600 | 1.50758400  |
| C | -2.62693100 | -2.91043300 | 1.24192100  |
| C | 2.65683400  | -1.73089700 | 1.99935200  |
| C | 6.77562700  | -0.66924900 | -0.65695300 |
| C | 2.78784400  | -2.67097500 | -2.97976900 |
| C | -2.40669300 | -1.68862500 | -2.38278500 |
| C | -6.25248600 | -1.81213100 | 0.85794000  |
| C | -1.74970500 | -3.53509300 | 2.28154700  |
| H | 1.55002200  | -4.55325700 | 0.50019800  |
| H | 1.77029300  | -4.60270300 | -1.26135300 |
| H | -0.59470000 | -4.49001800 | -1.66410000 |
| H | -0.77398000 | -4.96310400 | 0.03763000  |
| H | 5.18017700  | -0.94724800 | 1.52147600  |
| H | 5.26871200  | -1.64604200 | -2.70831300 |
| H | -4.92469600 | -1.33233500 | -1.46361200 |
| H | -4.36115100 | -2.87421500 | 2.49629500  |
| H | 2.07487900  | -2.64607400 | 2.15412600  |
| H | 3.36651400  | -1.62902000 | 2.82433400  |
| H | 1.93996300  | -0.90534400 | 2.08760500  |
| H | 7.34575400  | -0.91222700 | 0.24460800  |
| H | 7.33009800  | -1.04246400 | -1.52202800 |
| H | 6.75619400  | 0.42502900  | -0.73514600 |

|                          |             |             |             |   |             |             |             |
|--------------------------|-------------|-------------|-------------|---|-------------|-------------|-------------|
| H                        | 2.91951900  | -3.75722200 | -3.07418300 | C | 2.91629100  | 0.93809000  | -0.06998200 |
| H                        | 1.71770200  | -2.44675300 | -3.00356200 | C | 4.10093400  | 0.78550600  | 0.67128600  |
| H                        | 3.23920900  | -2.21704700 | -3.86520500 | C | 5.34878900  | 0.90963800  | 0.07119200  |
| H                        | -3.22266900 | -1.49679000 | -3.08424600 | C | 5.43742900  | 1.18660500  | -1.29153100 |
| H                        | -1.75385800 | -0.80664500 | -2.36956000 | C | 4.26975100  | 1.33124800  | -2.04316400 |
| H                        | -1.78763800 | -2.49637600 | -2.78907900 | C | 3.02186800  | 1.20635500  | -1.44382900 |
| H                        | -6.80192900 | -2.74510600 | 1.02753500  | C | -1.95082500 | -3.80823400 | -0.56479900 |
| H                        | -6.36194000 | -1.21074100 | 1.76681300  | C | -0.48657900 | -4.21370500 | -0.49106100 |
| H                        | -6.74700900 | -1.27761600 | 0.04252000  | C | -3.04960000 | -1.56108800 | -0.84483300 |
| H                        | -1.61224000 | -4.61048700 | 2.10722100  | C | 1.55553600  | -2.87475900 | 0.20107600  |
| H                        | -0.76149600 | -3.06583500 | 2.30204100  | C | -3.45953100 | -1.33751500 | -2.17295800 |
| H                        | -2.18801500 | -3.42416200 | 3.27580600  | C | -4.63425800 | -0.62036800 | -2.38471000 |
| C                        | -2.75218200 | 1.42816400  | -0.28992900 | C | -5.41991900 | -0.16281200 | -1.32081700 |
| C                        | -3.70020500 | 1.50037800  | -1.32550600 | C | -5.01206300 | -0.45887800 | -0.02344300 |
| C                        | -3.21130800 | 1.47649700  | 1.03638900  | C | -3.82479500 | -1.14736600 | 0.24779200  |
| C                        | -5.05916800 | 1.61126100  | -1.05049300 | C | 2.02093400  | -3.24729700 | 1.47700100  |
| H                        | -3.35245000 | 1.47534100  | -2.35708600 | C | 3.38278700  | -3.12294000 | 1.73571700  |
| C                        | -4.56873300 | 1.58653500  | 1.30894000  | C | 4.28274900  | -2.66891800 | 0.76406800  |
| H                        | -2.49988700 | 1.39909300  | 1.85288500  | C | 3.79183900  | -2.36397400 | -0.50135100 |
| C                        | -5.49905700 | 1.65347400  | 0.27041500  | C | 2.43168500  | -2.46622400 | -0.81635200 |
| H                        | -5.77345900 | 1.66903200  | -1.86817100 | C | -2.65904100 | -1.86344300 | -3.32170600 |
| H                        | -4.90550100 | 1.61464400  | 2.34223500  | C | -6.65142900 | 0.65271900  | -1.56961100 |
| H                        | -6.56048100 | 1.73481700  | 0.49170500  | C | -3.42038100 | -1.38599300 | 1.66696400  |
| C                        | -0.20938700 | 3.57893700  | -0.60409900 | C | 1.08805200  | -3.78920100 | 2.51389000  |
| C                        | -0.54553800 | 4.71858200  | 0.12722000  | C | 5.73743500  | -2.51637600 | 1.08719800  |
| C                        | 0.17972800  | 3.70652100  | -1.94156200 | C | 1.98367300  | -2.17175500 | -2.21456500 |
| C                        | -0.49476900 | 5.97749400  | -0.46969600 | C | 0.58537500  | 2.09885900  | 0.72993500  |
| H                        | -0.84782800 | 4.61795100  | 1.16800500  | C | -0.89270300 | 1.80517200  | 0.36385500  |
| C                        | 0.22667000  | 4.96504100  | -2.53301900 | H | 1.86169100  | 0.56704800  | 1.73052600  |
| H                        | 0.44665100  | 2.81725300  | -2.51177500 | H | 4.02834600  | 0.56559100  | 1.73564800  |
| C                        | -0.10938400 | 6.10391400  | -1.80115800 | H | 6.25095400  | 0.79134000  | 0.66636000  |
| H                        | -0.75851500 | 6.85742900  | 0.11049000  | H | 6.40951300  | 1.28874000  | -1.76693100 |
| H                        | 0.52991900  | 5.05538400  | -3.57270600 | H | 4.33183000  | 1.54525100  | -3.10713500 |
| H                        | -0.06932100 | 7.08437500  | -2.26764300 | H | 2.11639900  | 1.30778500  | -2.03504400 |
| <i>2-trans,cis-RCB-3</i> |             |             |             | H | -2.47473500 | -4.20510100 | -1.43905700 |
| Ru                       | -0.04370800 | -0.00583900 | 0.10367500  | H | -2.51589100 | -4.09575600 | 0.33362600  |
| Cl                       | -0.16887300 | -0.58270700 | 2.48395000  | H | -0.29096200 | -5.01531200 | 0.22677700  |
| Cl                       | -0.21326200 | 0.45543900  | -2.28336200 | H | -0.07957800 | -4.51667100 | -1.46697400 |
| N                        | -1.86568900 | -2.33946400 | -0.63798200 | H | -4.94906700 | -0.42131300 | -3.40818200 |
| N                        | 0.15122500  | -2.96334200 | -0.05671800 | H | -5.61892100 | -0.12582500 | 0.81760200  |
| C                        | -0.65784000 | -1.90265800 | -0.24153100 | H | 3.75244100  | -3.38451500 | 2.72664800  |
| C                        | 1.65612400  | 0.83037100  | 0.68851600  | H | 4.47948000  | -2.01481900 | -1.27152200 |
|                          |             |             |             | H | -2.58020600 | -2.95747000 | -3.29529200 |

|   |             |             |             |    |             |             |             |
|---|-------------|-------------|-------------|----|-------------|-------------|-------------|
| H | -3.11756900 | -1.59042700 | -4.27493700 | Ru | 0.07595300  | -0.12904400 | -0.31540300 |
| H | -1.64015900 | -1.46316300 | -3.30321900 | Cl | 0.65742800  | -1.00510000 | -2.55882200 |
| H | -7.20328600 | 0.30424100  | -2.44748600 | Cl | -0.46679500 | 0.38147300  | 1.99303400  |
| H | -7.32859100 | 0.63404200  | -0.71110600 | C  | 1.46480000  | 1.22270500  | -0.78773300 |
| H | -6.39372000 | 1.70308000  | -1.75465500 | C  | 2.45712500  | 1.84321100  | 0.10936900  |
| H | -4.29455700 | -1.60220700 | 2.28799400  | C  | 3.77391300  | 1.90063400  | -0.38341100 |
| H | -2.69695000 | -2.19772700 | 1.78045300  | C  | 4.80008500  | 2.47891100  | 0.35482200  |
| H | -2.93184800 | -0.49784000 | 2.08659400  | C  | 4.53126200  | 3.01250100  | 1.61319800  |
| H | 1.53452800  | -3.72869000 | 3.50906400  | C  | 3.23280600  | 2.95410500  | 2.12213600  |
| H | 0.14740400  | -3.23200900 | 2.53400000  | C  | 2.20645800  | 2.37464700  | 1.38531300  |
| H | 0.85863800  | -4.84652400 | 2.32615700  | C  | 0.07931500  | 1.97473500  | -1.18751200 |
| H | 6.31041100  | -2.18996000 | 0.21536500  | C  | -1.18821400 | 1.00617100  | -1.36888600 |
| H | 5.89074200  | -1.77521400 | 1.88038300  | H  | 1.95173400  | 0.91283900  | -1.71520600 |
| H | 6.17217600  | -3.45516400 | 1.44666900  | H  | 3.98207200  | 1.47691500  | -1.36491800 |
| H | 2.55170100  | -2.77859100 | -2.92813900 | H  | 5.80781400  | 2.51211800  | -0.05218000 |
| H | 0.91900200  | -2.35271200 | -2.37624400 | H  | 5.32704000  | 3.46898700  | 2.19603300  |
| H | 2.15576700  | -1.12171300 | -2.47214800 | H  | 3.01716600  | 3.36078300  | 3.10671000  |
| H | -1.14776100 | 2.16894600  | -0.63338000 | H  | 1.21057700  | 2.30849600  | 1.80783600  |
| C | -1.99275200 | 2.07393500  | 1.30557700  | H  | -1.15980100 | 0.67257800  | -2.40987500 |
| C | -3.26532700 | 2.24873300  | 0.73622800  | N  | 1.19725000  | -2.87382100 | 0.24420600  |
| C | -1.86970000 | 2.17922700  | 2.70051200  | N  | -0.98368400 | -2.83884000 | 0.44340900  |
| C | -4.37973400 | 2.50563400  | 1.52636000  | C  | 0.10411800  | -2.09566500 | 0.17787200  |
| H | -3.37091400 | 2.15898800  | -0.34456500 | C  | 0.86617700  | -4.22766700 | 0.71506200  |
| C | -2.98229800 | 2.44515500  | 3.48897500  | C  | -0.64279000 | -4.27005800 | 0.52345900  |
| H | -0.90480500 | 2.02223300  | 3.17231400  | C  | 2.54475400  | -2.42153400 | 0.08451200  |
| C | -4.24265200 | 2.60527800  | 2.90894800  | C  | -2.33639600 | -2.37255500 | 0.50244200  |
| H | -5.35464500 | 2.62614600  | 1.05930400  | C  | 3.14377700  | -1.64198100 | 1.08576600  |
| H | -2.86764500 | 2.52092900  | 4.56679100  | C  | 4.44057200  | -1.17024800 | 0.85823800  |
| H | -5.10831500 | 2.81167200  | 3.53258100  | C  | 5.14195700  | -1.46743900 | -0.30672700 |
| H | 0.58320200  | 2.27030800  | 1.81043900  | C  | 4.53478000  | -2.30197600 | -1.25152000 |
| C | 1.18489300  | 3.28489900  | 0.01020800  | C  | 3.24541300  | -2.79905100 | -1.07659100 |
| C | 2.18369100  | 3.99940500  | 0.68273100  | C  | -3.05957300 | -2.11890100 | -0.67134700 |
| C | 0.83884100  | 3.67406400  | -1.28568000 | C  | -4.38413300 | -1.68345700 | -0.53823400 |
| C | 2.82833600  | 5.07190000  | 0.07593900  | C  | -4.99096800 | -1.52129900 | 0.70287200  |
| H | 2.46983800  | 3.69382900  | 1.68829000  | C  | -4.24223700 | -1.80650200 | 1.85083000  |
| C | 1.48577900  | 4.74821300  | -1.89402900 | C  | -2.92095900 | -2.23700000 | 1.77715600  |
| H | 0.09166600  | 3.11751100  | -1.84381300 | C  | 2.46340600  | -1.30398700 | 2.37531600  |
| C | 2.48145300  | 5.45006500  | -1.21986600 | C  | 6.50235000  | -0.89184300 | -0.55558300 |
| H | 3.60447000  | 5.60911400  | 0.61430400  | C  | 2.64351500  | -3.72563300 | -2.08670500 |
| H | 1.20880200  | 5.03190600  | -2.90591500 | C  | -2.48079900 | -2.30188600 | -2.03869000 |
| H | 2.98492100  | 6.28473800  | -1.69981900 | C  | -6.41492300 | -1.06951000 | 0.81358900  |
|   |             |             |             | C  | -2.13861700 | -2.54030300 | 3.01602100  |
|   |             |             |             | H  | 1.16402700  | -4.33323100 | 1.76845800  |

*2-cis,cis-RCB-3*

|   |             |             |             |
|---|-------------|-------------|-------------|
| H | 1.40103600  | -4.97961600 | 0.12820500  |
| H | -0.93688600 | -4.76720000 | -0.41203400 |
| H | -1.17726800 | -4.74945900 | 1.34797700  |
| H | 4.90224400  | -0.53627000 | 1.61485400  |
| H | 5.07648600  | -2.56448700 | -2.15949900 |
| H | -4.95049700 | -1.45994600 | -1.44187200 |
| H | -4.69874400 | -1.68358400 | 2.83227800  |
| H | 1.57730300  | -1.91506200 | 2.56525800  |
| H | 3.15690900  | -1.42892900 | 3.21274600  |
| H | 2.12265300  | -0.26271000 | 2.38885000  |
| H | 6.93689000  | -0.47631200 | 0.35753100  |
| H | 7.19505700  | -1.63880600 | -0.95501100 |
| H | 6.45537300  | -0.07971000 | -1.29152600 |
| H | 2.83061400  | -4.77477000 | -1.82116000 |
| H | 1.56419400  | -3.57892800 | -2.17748900 |
| H | 3.08016600  | -3.56135600 | -3.07443800 |
| H | -3.19469200 | -2.81289700 | -2.69222400 |
| H | -2.24874800 | -1.33807600 | -2.50669000 |
| H | -1.54105500 | -2.85822600 | -2.03911300 |
| H | -7.07050300 | -1.88872700 | 1.13067500  |
| H | -6.52546500 | -0.27067500 | 1.55459700  |
| H | -6.79004900 | -0.69277900 | -0.14151000 |
| H | -1.85706300 | -3.59904300 | 3.07588000  |
| H | -1.21623100 | -1.95110700 | 3.04493600  |
| H | -2.71927400 | -2.30647700 | 3.91110500  |
| C | -2.58256300 | 1.38462200  | -1.03330100 |
| C | -3.43113000 | 1.60949200  | -2.13387400 |
| C | -3.14298900 | 1.46578200  | 0.25039500  |
| C | -4.76967300 | 1.94609300  | -1.96391600 |
| H | -3.02133300 | 1.51990700  | -3.13856100 |
| C | -4.48064200 | 1.80544200  | 0.41974000  |
| H | -2.53851300 | 1.21403200  | 1.11514200  |
| C | -5.29976400 | 2.05309400  | -0.67974800 |
| H | -5.39684800 | 2.12267000  | -2.83387100 |
| H | -4.89120700 | 1.85253100  | 1.42598300  |
| H | -6.34730400 | 2.30762300  | -0.53706500 |
| H | 0.32038900  | 2.11467200  | -2.24584200 |
| C | -0.09600100 | 3.32878100  | -0.56102200 |
| C | 0.47316200  | 4.40797100  | -1.25025000 |
| C | -0.73677800 | 3.58168100  | 0.65394900  |
| C | 0.40725900  | 5.70189400  | -0.74436200 |
| H | 0.98456500  | 4.22423900  | -2.19454000 |
| C | -0.80886500 | 4.87798500  | 1.15938800  |

|   |             |            |             |
|---|-------------|------------|-------------|
| H | -1.14370600 | 2.75955100 | 1.22981800  |
| C | -0.23815500 | 5.94244100 | 0.46676600  |
| H | 0.86145400  | 6.52041600 | -1.29625500 |
| H | -1.30924800 | 5.05083600 | 2.10867700  |
| H | -0.29398500 | 6.95099700 | 0.86735500  |

## MPWB1K

### 1a-PC

|    |             |             |             |
|----|-------------|-------------|-------------|
| Ru | 0.14942700  | -0.12133400 | 0.04713900  |
| Cl | 0.19105000  | 0.12933100  | -2.32558600 |
| Cl | 0.34977500  | -1.17826000 | 2.17897900  |
| P  | -2.20223900 | -0.55408200 | 0.02018600  |
| P  | 2.50015600  | -0.11831000 | -0.03865800 |
| C  | 0.07537900  | 1.53969600  | 0.79850700  |
| H  | 0.61541000  | 1.64939600  | 1.74630100  |
| C  | -1.93159400 | 5.12561200  | -0.21709300 |
| C  | -1.42467000 | 4.93870100  | 1.06041000  |
| C  | -0.75925900 | 3.76846600  | 1.36685800  |
| C  | -0.61610800 | 2.75494500  | 0.41275500  |
| C  | -1.12865000 | 2.96056400  | -0.87061800 |
| C  | -1.77241700 | 4.14182500  | -1.18132600 |
| H  | -2.44485300 | 6.04319000  | -0.46273500 |
| H  | -1.54058500 | 5.70775200  | 1.80853200  |
| H  | -0.34649800 | 3.62156900  | 2.35495000  |
| H  | -0.99666200 | 2.18969600  | -1.61384200 |
| H  | -2.16167700 | 4.29056800  | -2.17669400 |
| C  | 3.35847700  | 1.23709200  | -0.88932800 |
| C  | 4.75154700  | 1.27382500  | -0.89994300 |
| C  | 2.64409300  | 2.27333600  | -1.47246800 |
| C  | 5.41739200  | 2.32262300  | -1.50467900 |
| H  | 5.31321400  | 0.48253100  | -0.42354100 |
| C  | 3.31473700  | 3.32889300  | -2.07092800 |
| H  | 1.56646800  | 2.24693200  | -1.46607700 |
| C  | 4.69714100  | 3.35259400  | -2.09209000 |
| H  | 6.49649000  | 2.34165900  | -1.51092600 |
| H  | 2.75043500  | 4.13099800  | -2.52107600 |
| H  | 5.21700700  | 4.17467800  | -2.56041200 |
| C  | 3.39575400  | -0.15363500 | 1.54658500  |
| C  | 3.89568500  | -1.32016100 | 2.10517700  |
| C  | 3.53557400  | 1.04490400  | 2.23982500  |
| C  | 4.52940500  | -1.28892700 | 3.33605700  |

|   |             |             |             |
|---|-------------|-------------|-------------|
| H | 3.79893100  | -2.25838600 | 1.58364100  |
| C | 4.16603300  | 1.07370700  | 3.46976600  |
| H | 3.16715400  | 1.96482500  | 1.80743000  |
| C | 4.66451200  | -0.09523200 | 4.02171200  |
| H | 4.91572300  | -2.20352300 | 3.75920700  |
| H | 4.27217900  | 2.01062300  | 3.99510100  |
| H | 5.15766100  | -0.07341400 | 4.98149400  |
| C | 2.94141300  | -1.65119200 | -0.90496400 |
| C | 2.37298000  | -2.83329300 | -0.43294400 |
| C | 3.71403800  | -1.67852700 | -2.05751600 |
| C | 2.60264300  | -4.02794300 | -1.09046700 |
| H | 1.75129200  | -2.81086300 | 0.45302100  |
| C | 3.93610400  | -2.87689200 | -2.71512300 |
| H | 4.12670200  | -0.76544000 | -2.45619700 |
| C | 3.38679400  | -4.05186100 | -2.23203700 |
| H | 2.15900500  | -4.93796700 | -0.71590500 |
| H | 4.53360900  | -2.88851400 | -3.61383400 |
| H | 3.55931400  | -4.98262400 | -2.75055700 |
| C | -2.46395500 | -2.24425700 | -0.60996300 |
| C | -1.64822300 | -3.24156700 | -0.08155000 |
| C | -3.43053600 | -2.58217300 | -1.54829800 |
| C | -1.79645400 | -4.55399500 | -0.49133500 |
| H | -0.91376500 | -2.98815400 | 0.67065900  |
| C | -3.57187300 | -3.89772500 | -1.95944700 |
| H | -4.08005700 | -1.82419600 | -1.95715800 |
| C | -2.75488600 | -4.88422700 | -1.43527800 |
| H | -1.16095500 | -5.31913100 | -0.07189600 |
| H | -4.32461300 | -4.14965600 | -2.69086000 |
| H | -2.86663600 | -5.90777000 | -1.75920500 |
| C | -3.05814400 | -0.58461400 | 1.62600800  |
| C | -4.21333100 | -1.34245900 | 1.78690700  |
| C | -2.60565600 | 0.19831000  | 2.67853900  |
| C | -4.90900400 | -1.31153000 | 2.98187500  |
| H | -4.56737400 | -1.96193000 | 0.97597700  |
| C | -3.30660200 | 0.23363600  | 3.87236400  |
| H | -1.68947300 | 0.75728300  | 2.57356100  |
| C | -4.45720300 | -0.52002400 | 4.02573100  |
| H | -5.80150800 | -1.90710800 | 3.09851800  |
| H | -2.94211400 | 0.83924200  | 4.68777300  |
| H | -4.99737900 | -0.49785600 | 4.96008800  |
| C | -3.29037400 | 0.50392400  | -0.98478600 |
| C | -4.22540600 | 1.33900300  | -0.38385300 |
| C | -3.13595800 | 0.54637800  | -2.37010200 |

|   |             |             |             |
|---|-------------|-------------|-------------|
| C | -4.99674400 | 2.19618400  | -1.15123300 |
| H | -4.35337100 | 1.32805600  | 0.68692800  |
| C | -3.91109100 | 1.40212400  | -3.13206800 |
| H | -2.39818100 | -0.07922400 | -2.84731100 |
| C | -4.84255400 | 2.22997600  | -2.52529000 |
| H | -5.71769600 | 2.83845300  | -0.66897600 |
| H | -3.78257700 | 1.42204200  | -4.20362400 |
| H | -5.44624400 | 2.89615600  | -3.12317700 |

### 1b-PC

|    |             |             |             |
|----|-------------|-------------|-------------|
| Ru | -0.03074500 | 0.01737700  | 0.07133600  |
| Cl | -0.10203200 | -0.26456400 | -2.31820400 |
| Cl | 0.00165400  | 0.80038400  | 2.35742300  |
| P  | 2.32632900  | 0.45033300  | 0.02186100  |
| P  | -2.40788100 | 0.27838400  | 0.00395300  |
| C  | -0.02263300 | -1.68321600 | 0.73496000  |
| H  | -0.23012300 | -1.71533900 | 1.80950900  |
| C  | 3.21365900  | 0.17648100  | 1.61448000  |
| H  | 2.67960800  | 0.87471900  | 2.26471100  |
| C  | 4.69030200  | 0.55271600  | 1.60873500  |
| H  | 4.84287000  | 1.53587900  | 1.16298300  |
| H  | 5.25122200  | -0.15832500 | 0.99943700  |
| C  | 5.24183100  | 0.53078300  | 3.02611600  |
| H  | 6.30160500  | 0.78399700  | 3.01731200  |
| H  | 4.73859800  | 1.30146300  | 3.61454200  |
| C  | 5.02246900  | -0.82030600 | 3.68096600  |
| H  | 5.40068800  | -0.80981100 | 4.70245200  |
| H  | 5.59811600  | -1.57673100 | 3.14158800  |
| C  | 3.55345000  | -1.20143300 | 3.66123600  |
| H  | 3.40945600  | -2.18370900 | 4.10993000  |
| H  | 2.98440600  | -0.49183400 | 4.26550200  |
| C  | 2.99995100  | -1.19155600 | 2.24658500  |
| H  | 1.93648100  | -1.41241000 | 2.26612000  |
| H  | 3.48872900  | -1.97223200 | 1.66512100  |
| C  | 2.57348500  | 2.25974500  | -0.28177300 |
| H  | 3.62499200  | 2.38503300  | -0.55393000 |
| C  | 2.30677600  | 3.14704500  | 0.92693600  |
| H  | 2.93942900  | 2.86142400  | 1.76504900  |
| H  | 1.27758800  | 3.01463000  | 1.26267100  |
| C  | 2.56210300  | 4.60412500  | 0.57965700  |
| H  | 2.36706700  | 5.22865900  | 1.45044100  |
| H  | 3.61793700  | 4.73654200  | 0.32945900  |
| C  | 1.70805800  | 5.04720600  | -0.59130400 |

|   |             |             |             |   |             |             |             |
|---|-------------|-------------|-------------|---|-------------|-------------|-------------|
| H | 0.65752400  | 4.98766900  | -0.29767500 | H | -2.43370400 | 0.40570200  | 2.33079700  |
| H | 1.90508300  | 6.08957300  | -0.83904300 | C | -3.44466200 | -1.42419700 | 1.97089000  |
| C | 1.94367300  | 4.16164800  | -1.80112700 | H | -4.24980000 | -1.80998700 | 1.34219300  |
| H | 2.97027400  | 4.29579800  | -2.15128600 | H | -2.55525000 | -2.00995600 | 1.73862300  |
| H | 1.29344400  | 4.45585700  | -2.62487700 | C | -3.83904900 | -1.60211700 | 3.42632300  |
| C | 1.71727500  | 2.69848300  | -1.46534700 | H | -3.02079600 | -1.26060600 | 4.06319100  |
| H | 1.89631400  | 2.06419600  | -2.33327200 | H | -3.99368500 | -2.65822300 | 3.64510700  |
| H | 0.66118300  | 2.55062100  | -1.21693500 | C | -5.09223400 | -0.80609000 | 3.73871600  |
| C | 3.22817900  | -0.35901600 | -1.37653700 | H | -5.36283700 | -0.91473000 | 4.78820300  |
| H | 2.44687100  | -0.43486600 | -2.13810000 | H | -5.92564300 | -1.20788600 | 3.15695800  |
| C | 4.40163800  | 0.39487700  | -1.99150500 | C | -4.89924600 | 0.65842000  | 3.39425500  |
| H | 5.19781000  | 0.52310100  | -1.25468400 | H | -5.81232400 | 1.21990900  | 3.58968400  |
| H | 4.09828400  | 1.39071600  | -2.30875500 | H | -4.12706000 | 1.07797100  | 4.04239900  |
| C | 4.93872800  | -0.35847100 | -3.20011200 | C | -4.47619000 | 0.85332100  | 1.94546200  |
| H | 4.16761000  | -0.37147100 | -3.97337900 | H | -4.30577900 | 1.91400600  | 1.77515600  |
| H | 5.79144000  | 0.17603300  | -3.61756100 | H | -5.28894000 | 0.54989500  | 1.28307300  |
| C | 5.32118200  | -1.78624800 | -2.85937600 | C | -2.81645100 | 2.02671300  | -0.44659000 |
| H | 5.67109200  | -2.30608000 | -3.75031800 | H | -3.87967100 | 2.15845500  | -0.22930900 |
| H | 6.15497200  | -1.77801300 | -2.15304700 | C | -2.60878900 | 2.35058600  | -1.92054700 |
| C | 4.15041800  | -2.52180700 | -2.23518600 | H | -3.20978100 | 1.69497100  | -2.54744700 |
| H | 4.43500000  | -3.53759400 | -1.96284900 | H | -1.56849500 | 2.17053200  | -2.19628700 |
| H | 3.34008600  | -2.60455500 | -2.96325100 | C | -2.98024800 | 3.79511700  | -2.20831500 |
| C | 3.64782100  | -1.77766700 | -1.01129600 | H | -2.82012100 | 4.01184100  | -3.26367400 |
| H | 2.82125600  | -2.31317800 | -0.54846400 | H | -4.04676200 | 3.93899200  | -2.01696300 |
| H | 4.45208100  | -1.73860800 | -0.27435300 | C | -2.18047200 | 4.74730200  | -1.34269400 |
| C | -3.29707700 | -0.69090300 | -1.28406300 | H | -1.12289700 | 4.64270900  | -1.59704000 |
| H | -2.85727300 | -0.28427800 | -2.19824400 | H | -2.45316000 | 5.78091400  | -1.55222000 |
| C | -2.96767300 | -2.17607000 | -1.31236700 | C | -2.37685000 | 4.43338300  | 0.12929100  |
| H | -3.34923400 | -2.67827600 | -0.42393900 | H | -3.41930300 | 4.61856400  | 0.40050700  |
| H | -1.88947400 | -2.29921700 | -1.31859200 | H | -1.77212000 | 5.09681900  | 0.74732900  |
| C | -3.57602400 | -2.81772200 | -2.54842800 | C | -2.02721300 | 2.98831700  | 0.43482800  |
| H | -3.10438000 | -2.38733700 | -3.43456000 | H | -0.95838100 | 2.83422000  | 0.26477900  |
| H | -3.35145000 | -3.88358400 | -2.56025300 | H | -2.17864500 | 2.76304000  | 1.49022000  |
| C | -5.07627700 | -2.59089300 | -2.61338000 | C | 0.69425300  | -5.66262500 | -0.55992700 |
| H | -5.49051100 | -3.03701500 | -3.51676700 | C | 0.38708400  | -5.38096800 | 0.76061400  |
| H | -5.55335200 | -3.09479500 | -1.76887000 | C | 0.15402100  | -4.07355500 | 1.14336900  |
| C | -5.40551300 | -1.11094500 | -2.55793100 | C | 0.22286500  | -3.02418300 | 0.22084400  |
| H | -5.00721000 | -0.61941700 | -3.44854900 | C | 0.53465000  | -3.32804000 | -1.10759600 |
| H | -6.48429600 | -0.95811200 | -2.57069600 | C | 0.76594900  | -4.63399700 | -1.48976300 |
| C | -4.80203600 | -0.46165200 | -1.32346800 | H | 0.87891200  | -6.68125100 | -0.86624400 |
| H | -5.25993700 | -0.89755000 | -0.43327400 | H | 0.33114200  | -6.17574900 | 1.48842100  |
| H | -5.03873100 | 0.60263400  | -1.30928900 | H | -0.08240800 | -3.84820600 | 2.17367500  |
| C | -3.21398300 | 0.04870000  | 1.65410900  | H | 0.58793900  | -2.52413800 | -1.82526300 |

H 1.00568500 -4.85405200 -2.51902700

**pseudo-E 2b-PC**

Ru 0.02886900 -0.27446200 0.13446000  
C -0.13343300 -2.34075800 0.27474200  
N 0.89908200 -3.19203000 0.32069500  
N -1.23814100 -3.04246200 0.57421000  
C 0.52757200 -4.51110900 0.81499800  
H 0.88229400 -4.63277400 1.83805700  
H 0.97489400 -5.28760400 0.20037400  
C -0.98161200 -4.46788700 0.72822700  
H -1.47184700 -4.85178200 1.61792600  
H -1.36908500 -5.00725500 -0.13796200  
Cl 0.66657500 -0.40864300 -2.17749100  
Cl -0.01643300 -0.40752000 2.54857500  
C -2.59144000 -2.64550900 0.41788600  
C -3.38828100 -2.46361200 1.54405800  
C -3.12566000 -2.57821400 -0.87012000  
C -4.72782000 -2.15088300 1.35140100  
C -4.46931200 -2.27834300 -1.01341400  
C -5.28560100 -2.05437600 0.08648700  
H -5.35284100 -1.99320200 2.21968600  
H -4.88506700 -2.20700300 -2.00931200  
C 2.24508900 -2.99399700 -0.09278100  
C 3.23167500 -2.67594700 0.83639000  
C 2.56803400 -3.31612800 -1.41303000  
C 4.54761700 -2.61709800 0.39674100  
C 3.89274600 -3.23582800 -1.80651900  
C 4.89698700 -2.87951200 -0.91736000  
H 5.32131400 -2.36656200 1.10971000  
H 4.14771300 -3.47006800 -2.83068800  
C -2.25160700 -2.80468700 -2.05743500  
H -1.80502800 -3.79895600 -2.03923400  
H -2.81828100 -2.70674200 -2.97858800  
H -1.43013200 -2.08935200 -2.07877800  
C -2.83552700 -2.63006100 2.92125200  
H -3.48366400 -2.15823100 3.65420800  
H -2.76667100 -3.68632900 3.18473900  
H -1.84405300 -2.19513700 3.00381100  
C 2.91062100 -2.44108000 2.27558400  
H 2.00152000 -1.86039000 2.40193000  
H 2.77372700 -3.38679500 2.80099800

H 3.72574500 -1.91473000 2.76601200  
C 1.51294200 -3.77114600 -2.36648800  
H 0.79598800 -2.97541400 -2.54858700  
H 1.95430900 -4.05999200 -3.31564500  
H 0.96743400 -4.62986000 -1.97469900  
C -6.72901200 -1.70981900 -0.09691500  
H -7.21080200 -2.39046400 -0.79522500  
H -7.26953800 -1.75285300 0.84447900  
H -6.83458600 -0.70379500 -0.49983100  
C 6.31760100 -2.76800700 -1.37146400  
H 7.00991600 -2.91816400 -0.54751600  
H 6.54471500 -3.49651600 -2.14542800  
H 6.51256600 -1.77937500 -1.78631800  
C -1.74191700 0.15685900 0.20684100  
H -2.15772100 0.11337400 1.21789900  
C -2.74847700 0.61168400 -0.74248200  
C -2.62360100 0.52392000 -2.13000700  
C -3.94125000 1.10999300 -0.21075700  
C -3.65969800 0.92101300 -2.95152500  
H -1.71167000 0.12497600 -2.54510400  
C -4.96912300 1.53041600 -1.03333400  
H -4.05221500 1.15782000 0.86329300  
C -4.83163700 1.42860900 -2.40788500  
H -3.55438500 0.83824300 -4.02271800  
H -5.87780700 1.92564300 -0.60494700  
H -5.63513000 1.74443800 -3.05645500  
H 0.90286200 4.82515000 3.75392800  
C 0.72099500 3.79992900 4.08840400  
C -0.74914400 3.64138700 4.42875700  
C 1.14653500 2.82798900 2.99813600  
H 1.33559900 3.64729600 4.97491800  
C -1.60749700 3.82503700 3.19164900  
H -0.91579200 2.64077500 4.83247800  
H -1.03942900 4.35021400 5.20368100  
C 0.28436300 3.02373400 1.75698700  
H 1.04204300 1.80788300 3.35903600  
H 2.19839900 2.98942900 2.76551600  
C -1.19266000 2.85691600 2.09677200  
H -1.50595500 4.85182700 2.83009700  
H -2.66035600 3.68152600 3.43322400  
P 0.73037500 2.06123300 0.22396600  
H 0.42308800 4.06367600 1.45344100  
H -1.35563600 1.83496600 2.43185900



|   |             |             |             |    |             |             |             |
|---|-------------|-------------|-------------|----|-------------|-------------|-------------|
| H | -1.81335600 | 3.01061300  | 1.21255100  | Cl | -0.15068700 | -0.34935100 | 2.56125400  |
| C | 2.57602800  | 2.08111000  | 0.19515100  | C  | 0.62245700  | -2.35553900 | 0.27390700  |
| C | 0.14528800  | 3.32735500  | -1.01066200 | P  | -1.17245300 | 1.71213500  | 0.15298100  |
| C | 3.20625100  | 2.01593500  | -1.19142300 | N  | -0.25373200 | -3.36894500 | 0.26293100  |
| C | 3.08108800  | 0.88934400  | 1.00641700  | N  | 1.83496100  | -2.88212600 | 0.48157400  |
| H | 2.89336400  | 3.01222600  | 0.67696800  | C  | 1.81696300  | -4.32954800 | 0.65359900  |
| C | -0.01212000 | 2.84621500  | -2.44534400 | H  | 2.11285200  | -4.59023600 | 1.66811700  |
| C | 0.91280000  | 4.65029400  | -0.99802100 | H  | 2.51806500  | -4.79730400 | -0.03396600 |
| H | -0.86586500 | 3.53508800  | -0.64065500 | C  | 0.37087800  | -4.67934600 | 0.35946800  |
| C | 4.72183100  | 2.07172100  | -1.07755500 | H  | 0.24975600  | -5.21383200 | -0.58280200 |
| H | 2.89943800  | 1.08962300  | -1.67788800 | H  | -0.09460400 | -5.26754300 | 1.14634100  |
| H | 2.86132500  | 2.82770500  | -1.82342800 | C  | 3.09837800  | -2.23946200 | 0.43947600  |
| C | 4.59192500  | 0.92488100  | 1.14256000  | C  | 3.70859200  | -2.06147800 | -0.80087700 |
| H | 2.80168100  | -0.02390000 | 0.46497000  | C  | 4.98043300  | -1.51446700 | -0.83613500 |
| H | 2.59975300  | 0.82495600  | 1.97977600  | H  | 5.44961100  | -1.34293000 | -1.79533600 |
| C | -0.73613400 | 3.88906400  | -3.27964400 | C  | 5.65393700  | -1.16579000 | 0.32508500  |
| H | 0.96489400  | 2.63653400  | -2.88082800 | C  | 5.01955400  | -1.36268600 | 1.54260400  |
| H | -0.54774300 | 1.90708800  | -2.46493200 | H  | 5.52694900  | -1.08490700 | 2.45640800  |
| C | 0.17886800  | 5.69753500  | -1.82068200 | C  | 3.74370400  | -1.90235000 | 1.62605600  |
| H | 1.90230600  | 4.50213200  | -1.42947900 | C  | 2.97737200  | -2.41203700 | -2.05265100 |
| H | 1.07226200  | 5.02803700  | 0.00904500  | H  | 3.59412000  | -2.22482800 | -2.92645900 |
| C | 5.25759300  | 0.94036300  | -0.22030900 | H  | 2.06318200  | -1.82520400 | -2.14296500 |
| H | 5.01297300  | 3.02978700  | -0.63843200 | H  | 2.68482100  | -3.46245700 | -2.06323100 |
| H | 5.16721000  | 2.03581400  | -2.07121400 | C  | 7.03502800  | -0.59619500 | 0.25967700  |
| H | 4.87875700  | 1.81762600  | 1.70446500  | H  | 7.25852400  | 0.00320400  | 1.13832000  |
| H | 4.93179600  | 0.06801800  | 1.72349400  | H  | 7.15572700  | 0.03070400  | -0.62015200 |
| C | -0.02320700 | 5.22753200  | -3.24892700 | H  | 7.78096800  | -1.38820000 | 0.20430600  |
| H | -1.75136900 | 4.00987300  | -2.89250300 | C  | 3.07411900  | -2.09610000 | 2.94647200  |
| H | -0.83516600 | 3.53448600  | -4.30505600 | H  | 2.08599800  | -1.63968800 | 2.95626900  |
| H | -0.79301900 | 5.89657400  | -1.36283000 | H  | 3.66675200  | -1.65707000 | 3.74372900  |
| H | 0.73190400  | 6.63630400  | -1.80181700 | H  | 2.94761700  | -3.15324300 | 3.17752300  |
| H | 5.05119600  | -0.00787800 | -0.71932600 | C  | -1.62556600 | -3.31152600 | -0.10242500 |
| H | 6.33981600  | 1.01908500  | -0.11738800 | C  | -1.97895200 | -3.45171800 | -1.44249000 |
| H | 0.95205000  | 5.12536000  | -3.73093200 | C  | -3.33019500 | -3.47178000 | -1.76536900 |
| H | -0.57755800 | 5.97201100  | -3.81947000 | H  | -3.61195800 | -3.55551600 | -2.80591300 |

**pseudo-Z 2b-PC**

|    |             |             |             |   |             |             |             |
|----|-------------|-------------|-------------|---|-------------|-------------|-------------|
| Ru | 0.05685100  | -0.36584500 | 0.15597400  | H | -4.68077900 | -3.33525800 | 1.31016100  |
| C  | 1.70615800  | 0.38563200  | 0.36471700  | C | -2.59363400 | -3.28632800 | 0.90620500  |
| H  | 2.03792200  | 0.39507800  | 1.40766300  | C | -0.96886000 | -3.66949300 | -2.52262400 |
| C  | 2.70667200  | 1.01931000  | -0.48533000 | H | 0.02410900  | -3.34833200 | -2.23130700 |
| Cl | -0.25373600 | -0.52052800 | -2.22577100 | H | -1.23332700 | -3.10295600 | -3.40989500 |
|    |             |             |             | H | -0.93809600 | -4.72632200 | -2.79157000 |

|   |             |             |             |
|---|-------------|-------------|-------------|
| C | -5.76386700 | -3.51198200 | -1.16343200 |
| H | -6.35047100 | -2.74536400 | -0.66205600 |
| H | -6.17800600 | -4.47637400 | -0.87316800 |
| H | -5.90600800 | -3.39896600 | -2.23435600 |
| C | -2.20420700 | -3.26450600 | 2.34746000  |
| H | -3.08760100 | -3.23999600 | 2.97907600  |
| H | -1.58204300 | -2.40552000 | 2.58338600  |
| H | -1.63436500 | -4.15582000 | 2.60917900  |
| C | 2.67744800  | 1.03116300  | -1.88221500 |
| H | 1.84334900  | 0.57290300  | -2.38807300 |
| C | 3.69669100  | 1.62714400  | -2.59661800 |
| H | 3.66520800  | 1.62235300  | -3.67579100 |
| C | 4.75310400  | 2.24207600  | -1.93742000 |
| H | 5.54258300  | 2.71344700  | -2.50376900 |
| C | 4.78664500  | 2.25946000  | -0.55355700 |
| H | 5.60168400  | 2.74046000  | -0.03424200 |
| C | 3.77710400  | 1.64259000  | 0.16224300  |
| H | 3.81167500  | 1.62865900  | 1.24228200  |
| C | -1.01978600 | 2.70368500  | -1.40755200 |
| H | -0.85439300 | 1.91807800  | -2.14913400 |
| C | -2.22743700 | 3.51750100  | -1.86297200 |
| H | -3.11644500 | 2.89384700  | -1.92929400 |
| H | -2.44612600 | 4.30869900  | -1.14311000 |
| C | -1.96412000 | 4.13195100  | -3.23035300 |
| H | -1.86266500 | 3.32674200  | -3.96119000 |
| H | -2.82407700 | 4.72673400  | -3.53747700 |
| C | -0.70245000 | 4.97416100  | -3.24507300 |
| H | -0.52613100 | 5.37333300  | -4.24334400 |
| H | -0.83355400 | 5.83314200  | -2.58223100 |
| C | 0.48838900  | 4.16072800  | -2.77438900 |
| H | 1.39065100  | 4.77129900  | -2.75690400 |
| H | 0.67161100  | 3.34461600  | -3.47659400 |
| C | 0.22589400  | 3.58194900  | -1.39593200 |
| H | 0.08489700  | 4.40691700  | -0.69487600 |
| H | 1.08828900  | 3.01692000  | -1.05171000 |
| C | -0.91877600 | 2.80711800  | 1.61965300  |
| H | -1.26344500 | 2.16257100  | 2.43141000  |
| C | 0.53215400  | 3.12367400  | 1.96289800  |
| H | 1.08566500  | 2.19244600  | 2.04409400  |
| H | 1.00247100  | 3.72101100  | 1.18241800  |
| C | 0.60884600  | 3.87309000  | 3.28459200  |
| H | 0.25547500  | 3.21520000  | 4.08155000  |
| H | 1.64741800  | 4.11117400  | 3.51274900  |

|   |             |             |             |
|---|-------------|-------------|-------------|
| C | -0.23267500 | 5.13463600  | 3.26514200  |
| H | -0.17182400 | 5.64862000  | 4.22379600  |
| H | 0.16399600  | 5.82278200  | 2.51433000  |
| C | -1.67540500 | 4.80881100  | 2.92975900  |
| H | -2.27679600 | 5.71681900  | 2.89290900  |
| H | -2.09570100 | 4.18383400  | 3.72110800  |
| C | -1.77345400 | 4.06832800  | 1.60601300  |
| H | -1.43707700 | 4.73140300  | 0.80736000  |
| H | -2.81600300 | 3.82946100  | 1.39689000  |
| C | -2.98506800 | 1.36076300  | 0.23816200  |
| H | -3.47366400 | 2.31533100  | 0.02724000  |
| C | -3.41195300 | 0.37094400  | -0.83965300 |
| H | -3.00114400 | 0.63977000  | -1.81235300 |
| H | -3.00012700 | -0.61652500 | -0.61060900 |
| C | -4.92839200 | 0.29708100  | -0.90110200 |
| H | -5.31560900 | 1.26506500  | -1.23167700 |
| H | -5.23372600 | -0.43193800 | -1.65185400 |
| C | -5.53286100 | -0.05248600 | 0.44784000  |
| H | -6.62112800 | -0.01460900 | 0.39571400  |
| H | -5.26200500 | -1.07700600 | 0.69855900  |
| C | -5.02472700 | 0.85484800  | 1.55262300  |
| H | -5.41475200 | 0.52768200  | 2.51600600  |
| H | -5.39745100 | 1.87024600  | 1.39426100  |
| C | -3.50492300 | 0.89184600  | 1.58962800  |
| H | -3.10269000 | -0.09855600 | 1.81369700  |
| H | -3.18053600 | 1.54975200  | 2.39294500  |

**1a-Inact-C PPh<sub>3</sub>Cl<sub>2</sub>Ru=CHPh**

|    |             |             |             |
|----|-------------|-------------|-------------|
| Ru | -0.87841700 | -0.54378400 | -0.91893500 |
| Cl | -0.74704500 | 0.87329500  | -2.72449600 |
| Cl | -0.80857400 | -2.75024700 | -0.27152000 |
| P  | 0.98810800  | 0.06516500  | 0.09637500  |
| C  | -1.93002900 | 0.29704000  | 0.28746100  |
| H  | -1.54753000 | 1.00540000  | 1.02438500  |
| C  | -3.37638900 | 0.16697700  | 0.26392300  |
| C  | -4.16419800 | 1.16802700  | 0.83812300  |
| C  | -5.54227900 | 1.09665400  | 0.78542600  |
| C  | -6.15618000 | 0.01542400  | 0.17209500  |
| C  | -5.38744100 | -0.99596300 | -0.38328300 |
| C  | -4.00933000 | -0.92473000 | -0.33817600 |
| H  | -7.23318400 | -0.04406700 | 0.13615600  |
| H  | -6.13956300 | 1.88018300  | 1.22573300  |

|   |             |             |             |   |             |            |             |
|---|-------------|-------------|-------------|---|-------------|------------|-------------|
| H | -3.68253300 | 2.00843500  | 1.31647000  | C | 2.12124100  | 0.46421800 | -0.11038900 |
| H | -3.41340100 | -1.73510600 | -0.73404100 | H | 1.77770200  | 1.49446300 | -0.15580800 |
| H | -5.86473700 | -1.84687600 | -0.84393300 | C | -1.11356400 | 0.98176200 | 1.60506200  |
| C | 1.06053000  | 1.79005500  | 0.67019500  | H | -1.08382200 | 0.16424000 | 2.33119100  |
| C | 1.81763200  | 2.13853000  | 1.78489700  | C | 0.04140600  | 1.89991900 | 1.98381000  |
| C | 0.37902400  | 2.77996900  | -0.03101900 | H | 0.14321900  | 2.70959200 | 1.25896800  |
| C | 1.89811300  | 3.46077100  | 2.18600500  | H | 0.96651500  | 1.32940200 | 1.97985600  |
| H | 2.34062400  | 1.37943600  | 2.34527100  | C | -0.17778400 | 2.48554600 | 3.36923100  |
| C | 0.46407400  | 4.10090800  | 0.37491500  | H | -0.14217500 | 1.67495700 | 4.09996500  |
| H | -0.20950000 | 2.51403700  | -0.89629500 | H | 0.64080200  | 3.16089000 | 3.61385400  |
| C | 1.22203400  | 4.44318400  | 1.48200200  | C | -1.51066000 | 3.19994600 | 3.47990900  |
| H | 2.48636600  | 3.72088000  | 3.05256100  | H | -1.64921900 | 3.59061400 | 4.48691700  |
| H | -0.06664000 | 4.86154100  | -0.17672900 | H | -1.52042200 | 4.06063800 | 2.80637400  |
| H | 1.28328200  | 5.47334100  | 1.79838000  | C | -2.64919000 | 2.26668400 | 3.11501600  |
| C | 1.44259500  | -0.89774600 | 1.56786300  | H | -2.69129200 | 1.44879400 | 3.83765900  |
| C | 2.76668200  | -1.21829100 | 1.84314700  | H | -3.60549000 | 2.78519900 | 3.17106600  |
| C | 0.44835600  | -1.26180800 | 2.46783300  | C | -2.45765800 | 1.69127800 | 1.72146300  |
| C | 3.09135600  | -1.88770900 | 3.01173800  | H | -2.50515500 | 2.50502800 | 0.99594000  |
| H | 3.54502300  | -0.94881400 | 1.14510000  | H | -3.27482400 | 1.00933600 | 1.48546200  |
| C | 0.77630100  | -1.92328100 | 3.63636500  | C | -1.34467100 | 1.08476700 | -1.45440400 |
| H | -0.58512400 | -1.05030500 | 2.23855100  | H | -0.88359500 | 0.50637200 | -2.25937000 |
| C | 2.09797900  | -2.23657800 | 3.90995200  | C | -0.67876100 | 2.45848700 | -1.44168700 |
| H | 4.12103900  | -2.13803200 | 3.21596700  | H | -1.09584600 | 3.06423200 | -0.63475300 |
| H | -0.00279800 | -2.20911000 | 4.32579200  | H | 0.38676600  | 2.36163900 | -1.25093100 |
| H | 2.35147000  | -2.76129900 | 4.81840200  | C | -0.89327600 | 3.18316000 | -2.76012200 |
| C | 2.38085800  | -0.15371200 | -1.03822400 | H | -0.40639600 | 2.62058300 | -3.55882100 |
| C | 2.60473100  | -1.43523900 | -1.53535800 | H | -0.41248600 | 4.15993300 | -2.72404700 |
| C | 3.18106400  | 0.90095200  | -1.45203700 | C | -2.37016700 | 3.32562000 | -3.06989200 |
| C | 3.63292400  | -1.65596300 | -2.43215800 | H | -2.51295300 | 3.82644800 | -4.02621900 |
| H | 1.97293200  | -2.25406700 | -1.21688000 | H | -2.83950300 | 3.95696700 | -2.31138100 |
| C | 4.20810400  | 0.67312500  | -2.35346000 | C | -3.03994300 | 1.96611600 | -3.08046500 |
| H | 3.00263500  | 1.89705700  | -1.07724300 | H | -4.10682600 | 2.06460300 | -3.27682600 |
| C | 4.43501400  | -0.60162400 | -2.84152100 | H | -2.62482100 | 1.36919400 | -3.89514500 |
| H | 3.80458100  | -2.64969300 | -2.81587500 | C | -2.83280200 | 1.22016400 | -1.77176700 |
| H | 4.82812400  | 1.49520700  | -2.67620300 | H | -3.29785300 | 0.24162100 | -1.86044500 |
| H | 5.23405600  | -0.77478200 | -3.54602400 | H | -3.34750100 | 1.74803700 | -0.96730200 |

**1b-Inact-C PCy<sub>3</sub>Cl<sub>2</sub>Ru=CHPh**

|    |             |             |             |   |             |             |            |
|----|-------------|-------------|-------------|---|-------------|-------------|------------|
| Ru | 1.05863700  | -0.98905400 | -0.18192700 | C | -2.42638600 | -1.95240500 | 1.40253300 |
| Cl | 1.06740400  | -1.70203100 | 2.02360900  | H | -2.56527400 | -1.26569500 | 2.23607600 |
| Cl | 0.94835300  | -1.41649900 | -2.45298900 | H | -1.51727700 | -2.51562200 | 1.60945800 |
| P  | -0.91014200 | 0.05131000  | 0.02764100  | C | -3.62048700 | -2.89299300 | 1.32929500 |
|    |             |             |             | H | -3.70514800 | -3.44505900 | 2.26421100 |

H -4.53574100 -2.30340200 1.23081100  
C -3.51812000 -3.84851900 0.15573100  
H -2.65605000 -4.50332400 0.29852400  
H -4.39668800 -4.49087800 0.11398500  
C -3.35321100 -3.08766300 -1.14618600  
H -4.25490100 -2.50092900 -1.34110500  
H -3.23953900 -3.77569800 -1.98231200  
C -2.15432200 -2.15995000 -1.07794800  
H -1.24839100 -2.75628700 -0.94755400  
H -2.01849500 -1.63014000 -2.02036300  
C 6.33825200 0.04518700 -0.11795500  
C 5.75308400 1.24490400 -0.49168400  
C 4.37883800 1.37842700 -0.46531800  
C 3.56525800 0.31160700 -0.07590600  
C 4.17141300 -0.88791700 0.31249500  
C 5.54524900 -1.01763300 0.28760600  
H 7.41233900 -0.05906700 -0.13316800  
H 6.36972500 2.07523400 -0.79956700  
H 3.92009100 2.31195500 -0.75712400  
H 3.56194100 -1.70430600 0.67500200  
H 6.00124200 -1.94569500 0.59550100

**2b-Inact-C NHC-Cl<sub>2</sub>Ru=CHPh**

Ru 0.25385800 0.81831300 0.12332100  
C 0.48445900 -1.10729000 0.04703200  
N 1.72398700 -1.62557100 0.02842900  
N -0.37616000 -2.13441600 0.07514300  
C 1.74806600 -3.06941400 0.15380600  
H 2.13094200 -3.35340600 1.13419500  
H 2.39040700 -3.50925500 -0.60474000  
C 0.28371000 -3.42823100 -0.02635700  
H -0.08763700 -4.10518900 0.73850300  
H 0.07825400 -3.87294700 -1.00021600  
Cl 0.80618600 1.39955000 -2.05578700  
Cl 0.53226600 1.00465500 2.41651200  
C -1.78512100 -2.09019100 -0.04124200  
C -2.55395400 -2.17073200 1.11503400  
C -2.35884100 -1.98009600 -1.30463800  
C -3.93423400 -2.15480200 0.98197200  
C -3.74259400 -1.96966800 -1.39097700  
C -4.54496800 -2.06448300 -0.26169300  
H -4.54631200 -2.20549800 1.87176100

H -4.20483500 -1.87311100 -2.36354500  
C 2.92759600 -0.87180500 -0.00940000  
C 3.56969000 -0.51981000 1.17623000  
C 3.49076400 -0.59164000 -1.25742400  
C 4.72930100 0.23914700 1.08506100  
C 4.65111100 0.16020400 -1.29584000  
C 5.26922200 0.60796700 -0.13528300  
H 5.22323500 0.54131700 1.99810300  
H 5.08279900 0.40520900 -2.25601500  
C -1.50363000 -1.78540500 -2.51380600  
H -0.70844600 -2.52597600 -2.57512100  
H -2.09554800 -1.85005100 -3.42151600  
H -1.02490500 -0.80604300 -2.48639500  
C -1.89386700 -2.19779500 2.45462100  
H -2.63204300 -2.24025000 3.24948200  
H -1.23623800 -3.05923100 2.56090500  
H -1.28181800 -1.30773400 2.59629000  
C 3.10910600 -1.01072800 2.51085900  
H 2.05191500 -1.24848100 2.52225100  
H 3.67685600 -1.89968800 2.78885300  
H 3.27343500 -0.25794900 3.27555900  
C 2.88824200 -1.14187800 -2.50946800  
H 1.81351400 -0.99105900 -2.53480600  
H 3.31057000 -0.65565800 -3.38317400  
H 3.09158300 -2.21061700 -2.59139000  
C -6.03560300 -2.09162400 -0.38492700  
H -6.39139300 -3.11204300 -0.52111700  
H -6.51462100 -1.69578800 0.50641300  
H -6.37326800 -1.51202500 -1.23979000  
C 6.48689800 1.47310600 -0.20645400  
H 7.09486800 1.37771800 0.68890500  
H 7.10224700 1.22138900 -1.06626900  
H 6.20508200 2.52074200 -0.30248600  
C -1.54380600 0.99044800 0.02793400  
H -2.24901400 0.16686700 0.05262600  
C -2.16031900 2.30295000 0.00385600  
C -1.41067900 3.46900000 -0.18396200  
C -3.53915900 2.41715900 0.19896300  
C -2.02014000 4.70588900 -0.16260600  
H -0.34880600 3.40349800 -0.37882700  
C -4.14825200 3.65684900 0.22099700  
H -4.12381800 1.51898900 0.33790600  
C -3.38893700 4.80248600 0.04155600

H -1.43157600 5.59740800 -0.31280000  
H -5.21370800 3.73243500 0.37507500  
H -3.86427400 5.77143300 0.05486600

**PPH<sub>3</sub>**

C -0.89397800 -1.36175900 -0.42771800  
C 1.66522700 -0.11540800 -0.38856100  
C -0.70472300 1.46267700 -0.43686400  
C -0.41911400 -2.14933700 0.61419200  
C -2.16392100 -1.62167400 -0.93779700  
C 2.01555000 0.61982000 0.73752200  
C 2.60641700 -0.97832600 -0.94437300  
C -0.52231400 2.68510900 -1.07649200  
C -1.44568000 1.42745800 0.73967700  
C -1.20055800 -3.16879200 1.13629000  
H 0.56449300 -1.96849600 1.02078700  
C -2.94956600 -2.62684500 -0.40639700  
H -2.53945500 -1.02814800 -1.75952700  
C 3.27535500 0.48810200 1.29897600  
H 1.30319700 1.30107800 1.17737000  
C 3.85904700 -1.12175600 -0.37525700  
H 2.35390200 -1.53988200 -1.83275400  
C -1.04955400 3.84883800 -0.54469300  
H 0.03362600 2.72245200 -2.00246800  
C -1.98255400 2.59005100 1.26715300  
H -1.60733400 0.48594500 1.24338100  
C -2.46675000 -3.40745200 0.63225200  
H -0.81644800 -3.77452000 1.94316600  
H -3.93396400 -2.80957300 -0.80964600  
C 4.19743000 -0.38482400 0.74784100  
H 3.53507900 1.06966000 2.17059900  
H 4.57496300 -1.79849200 -0.81632400  
C -1.78353700 3.80274400 0.62853600  
H -0.89767800 4.78892500 -1.05276900  
H -2.55777500 2.54717600 2.17970200  
H -3.07292900 -4.20065200 1.04235400  
H 5.17831400 -0.48545800 1.18673500  
H -2.20490200 4.70707200 1.04035600  
P 0.04345500 -0.00874700 -1.22553800

**PCy<sub>3</sub>**

P -0.23490400 -0.07238900 -1.03581900  
C 0.76340600 -1.46126300 -0.30371800  
H 0.05732800 -2.29524300 -0.37144400  
C 1.21769800 -1.37339200 1.14545000  
H 0.38923800 -1.09508600 1.79694500  
H 1.97032300 -0.58858000 1.23881000  
C 1.83361600 -2.68778300 1.59990500  
H 2.16012600 -2.61213000 2.63676100  
H 1.07254300 -3.47111600 1.56743000  
C 2.99509400 -3.08039600 0.70541400  
H 3.41599300 -4.03307700 1.02465400  
H 3.78992900 -2.33751300 0.80784700  
C 2.56474700 -3.15137600 -0.74865300  
H 3.41381600 -3.40063500 -1.38433600  
H 1.83732800 -3.95801400 -0.86802300  
C 1.93494100 -1.84543300 -1.20415000  
H 1.59672900 -1.92456500 -2.23629700  
H 2.69280300 -1.06098200 -1.18489900  
C -1.79876200 -0.13754300 -0.03288000  
H -1.57327500 -0.05691800 1.03514500  
C -2.53277100 -1.45254000 -0.27176400  
H -1.92883200 -2.29585600 0.05741700  
H -2.68639200 -1.57894200 -1.34669100  
C -3.87506400 -1.49417300 0.43779300  
H -4.37528700 -2.43885400 0.22696000  
H -3.71196300 -1.46114000 1.51758800  
C -4.75127300 -0.32569000 0.03047600  
H -4.98695800 -0.40681600 -1.03318400  
H -5.70005300 -0.35471100 0.56479700  
C -4.03810100 0.98829700 0.28389700  
H -3.88035700 1.11044900 1.35816200  
H -4.65538600 1.82653300 -0.03768400  
C -2.69705700 1.03150500 -0.42920500  
H -2.20075600 1.98032100 -0.22805400  
H -2.86219000 0.99209800 -1.50914500  
C 0.51824200 1.53881800 -0.47892700  
H -0.05251800 2.26620000 -1.06768500  
C 0.42383300 1.98234200 0.97645000  
H 0.99772500 1.30960200 1.61277100  
H -0.60604700 1.93966700 1.32822000  
C 0.96372800 3.39711800 1.13555000  
H 0.33065100 4.08534500 0.57010400

|   |            |            |             |
|---|------------|------------|-------------|
| H | 0.90266300 | 3.70442900 | 2.17920100  |
| C | 2.39191800 | 3.50973900 | 0.63312000  |
| H | 2.74949600 | 4.53367300 | 0.73456400  |
| H | 3.04015800 | 2.88908700 | 1.25663000  |
| C | 2.49979100 | 3.04703400 | -0.80772200 |
| H | 3.53445000 | 3.09374200 | -1.14593400 |
| H | 1.92851200 | 3.72191900 | -1.44908300 |
| C | 1.96043700 | 1.63696000 | -0.96189800 |
| H | 2.03588200 | 1.30846000 | -1.99877500 |
| H | 2.58133900 | 0.96114500 | -0.37031700 |

**TPSS**

**1a-PC**

|    |             |             |             |
|----|-------------|-------------|-------------|
| Ru | 0.14902400  | -0.06981700 | 0.03492500  |
| Cl | 0.15655200  | 0.20973100  | -2.34367600 |
| Cl | 0.32270000  | -1.19001400 | 2.15733600  |
| P  | -2.23796300 | -0.52749500 | 0.02206200  |
| P  | 2.53563000  | -0.13346900 | -0.05769600 |
| C  | 0.14495700  | 1.65614700  | 0.73117900  |
| H  | 0.83434300  | 1.81655700  | 1.58028200  |
| C  | -1.95397200 | 5.28567900  | -0.16269200 |
| C  | -1.27742200 | 5.12886200  | 1.05983100  |
| C  | -0.59651800 | 3.93907300  | 1.32954700  |
| C  | -0.60321400 | 2.86493500  | 0.39697500  |
| C  | -1.28712100 | 3.04371700  | -0.83200500 |
| C  | -1.94566800 | 4.24590300  | -1.10739000 |
| H  | -2.47646100 | 6.21638000  | -0.37982600 |
| H  | -1.27387300 | 5.93610200  | 1.79086300  |
| H  | -0.05417600 | 3.82062900  | 2.26815500  |
| H  | -1.26269500 | 2.24124700  | -1.56539600 |
| H  | -2.45898100 | 4.37074700  | -2.05940900 |
| C  | 3.45836400  | 1.21276100  | -0.92593700 |
| C  | 4.87087800  | 1.23040800  | -0.90018100 |
| C  | 2.76978500  | 2.25663600  | -1.57070300 |
| C  | 5.57789800  | 2.26624400  | -1.52362500 |
| H  | 5.41488700  | 0.44078600  | -0.38324400 |
| C  | 3.48229700  | 3.29729000  | -2.18707000 |
| H  | 1.68321300  | 2.24472600  | -1.59977200 |
| C  | 4.88361000  | 3.30300700  | -2.16835300 |
| H  | 6.66671500  | 2.26766400  | -1.49882600 |
| H  | 2.93744100  | 4.10041500  | -2.68083000 |
| H  | 5.43396500  | 4.11118000  | -2.64814400 |

|   |             |             |             |
|---|-------------|-------------|-------------|
| C | 3.46389400  | -0.19173200 | 1.54467600  |
| C | 3.98360000  | -1.37944000 | 2.09007800  |
| C | 3.61627200  | 1.01326900  | 2.26306300  |
| C | 4.64495400  | -1.36245100 | 3.32713700  |
| H | 3.88201600  | -2.31862400 | 1.55156500  |
| C | 4.27337800  | 1.02670000  | 3.49984900  |
| H | 3.23904200  | 1.94733000  | 1.84799000  |
| C | 4.78949000  | -0.16261300 | 4.03677100  |
| H | 5.04476500  | -2.29035800 | 3.73353900  |
| H | 4.38557300  | 1.96581600  | 4.03990000  |
| H | 5.30156900  | -0.15219500 | 4.99768900  |
| C | 2.96602800  | -1.69648600 | -0.94019400 |
| C | 2.39468400  | -2.89947900 | -0.46834400 |
| C | 3.75007400  | -1.72062800 | -2.10940100 |
| C | 2.63413200  | -4.10650500 | -1.13879800 |
| H | 1.75958200  | -2.88416300 | 0.41799200  |
| C | 3.97929900  | -2.93088100 | -2.77999300 |
| H | 4.16908000  | -0.79816400 | -2.50467300 |
| C | 3.42830600  | -4.12569400 | -2.29502300 |
| H | 2.19039400  | -5.02733900 | -0.76306700 |
| H | 4.58366700  | -2.93570300 | -3.68593500 |
| H | 3.60657000  | -5.06264100 | -2.82054200 |
| C | -2.51254600 | -2.29896700 | -0.47443500 |
| C | -1.76799000 | -3.29019600 | 0.20160400  |
| C | -3.43781400 | -2.69525600 | -1.46022300 |
| C | -1.94549900 | -4.64495800 | -0.10858300 |
| H | -1.06331300 | -2.99683100 | 0.97945200  |
| C | -3.60665700 | -4.05355000 | -1.77058900 |
| H | -4.03347000 | -1.95223200 | -1.98521300 |
| C | -2.86098800 | -5.03200300 | -1.09878700 |
| H | -1.36738500 | -5.39699400 | 0.42697900  |
| H | -4.32568600 | -4.34200500 | -2.53619500 |
| H | -2.99423500 | -6.08516700 | -1.34191700 |
| C | -3.09615600 | -0.44465700 | 1.66074400  |
| C | -4.24986100 | -1.21530100 | 1.91299200  |
| C | -2.61856600 | 0.42293700  | 2.65979200  |
| C | -4.91769500 | -1.10967000 | 3.14062400  |
| H | -4.62269500 | -1.90016500 | 1.15286000  |
| C | -3.29209500 | 0.53198700  | 3.88481900  |
| H | -1.71084600 | 0.99479300  | 2.48428200  |
| C | -4.44165500 | -0.23299900 | 4.12810100  |
| H | -5.80520100 | -1.71338200 | 3.32525800  |
| H | -2.90842100 | 1.20309900  | 4.65173000  |

|   |             |             |             |
|---|-------------|-------------|-------------|
| H | -4.95888800 | -0.15415500 | 5.08330500  |
| C | -3.38592900 | 0.42060500  | -1.07925000 |
| C | -4.42206600 | 1.21481900  | -0.54542500 |
| C | -3.20438400 | 0.39050200  | -2.48122100 |
| C | -5.26605400 | 1.94849300  | -1.39195200 |
| H | -4.57288000 | 1.26298600  | 0.53056800  |
| C | -4.05292700 | 1.12397900  | -3.32185200 |
| H | -2.39172200 | -0.19063900 | -2.90952900 |
| C | -5.08779000 | 1.90313700  | -2.78177600 |
| H | -6.06200200 | 2.55400900  | -0.96052800 |
| H | -3.90044300 | 1.08554100  | -4.39960100 |
| H | -5.74665000 | 2.47025900  | -3.43803200 |

**1b-PC**

|    |             |             |             |
|----|-------------|-------------|-------------|
| Ru | -0.02720700 | -0.01319700 | 0.07667800  |
| Cl | -0.07336000 | -0.28475500 | -2.33733500 |
| Cl | -0.02036500 | 0.82699700  | 2.36991300  |
| P  | 2.36165000  | 0.45474300  | 0.02797000  |
| P  | -2.43958700 | 0.28873400  | -0.00618800 |
| C  | -0.01662200 | -1.73763300 | 0.77027600  |
| H  | -0.21755700 | -1.76828600 | 1.85762300  |
| C  | 3.27598200  | 0.14609300  | 1.65011300  |
| H  | 2.74624800  | 0.84364200  | 2.31904300  |
| C  | 4.77937100  | 0.51430400  | 1.64114800  |
| H  | 4.93903200  | 1.51951900  | 1.22682000  |
| H  | 5.32982600  | -0.19021700 | 0.99881600  |
| C  | 5.36026500  | 0.44620200  | 3.07187300  |
| H  | 6.43302900  | 0.68864500  | 3.04666200  |
| H  | 4.87291800  | 1.21475400  | 3.69339400  |
| C  | 5.13545300  | -0.93822000 | 3.70773100  |
| H  | 5.52081700  | -0.94911800 | 4.73766800  |
| H  | 5.70940900  | -1.69265000 | 3.14451600  |
| C  | 3.64186600  | -1.31635800 | 3.68881300  |
| H  | 3.49761700  | -2.32420900 | 4.10498300  |
| H  | 3.07939800  | -0.62036500 | 4.33101000  |
| C  | 3.06067500  | -1.25735700 | 2.26004500  |
| H  | 1.98734600  | -1.47631900 | 2.28749300  |
| H  | 3.54312300  | -2.02737100 | 1.64173300  |
| C  | 2.63755900  | 2.30643000  | -0.24904300 |
| H  | 3.70920600  | 2.40708100  | -0.48796100 |
| C  | 2.35378500  | 3.20174000  | 0.97985600  |
| H  | 2.95229600  | 2.88052300  | 1.84239200  |
| H  | 1.30128200  | 3.10183200  | 1.27928600  |

|   |             |             |             |
|---|-------------|-------------|-------------|
| C | 2.68486200  | 4.67583800  | 0.65832300  |
| H | 2.45938000  | 5.30090600  | 1.53454000  |
| H | 3.76758800  | 4.77086600  | 0.47096400  |
| C | 1.91184700  | 5.18337100  | -0.57304800 |
| H | 0.83556300  | 5.19912400  | -0.33918700 |
| H | 2.20097300  | 6.21863800  | -0.80585100 |
| C | 2.15223900  | 4.27423000  | -1.79318500 |
| H | 3.20784800  | 4.35133600  | -2.10264400 |
| H | 1.54694200  | 4.60921300  | -2.64825600 |
| C | 1.82800300  | 2.80053300  | -1.47261600 |
| H | 2.01088500  | 2.16727600  | -2.35081900 |
| H | 0.75320000  | 2.70243300  | -1.25082900 |
| C | 3.29838000  | -0.33630200 | -1.41611100 |
| H | 2.52292300  | -0.33976100 | -2.20020000 |
| C | 4.53471000  | 0.40846200  | -1.97917400 |
| H | 5.33643800  | 0.44366700  | -1.22601800 |
| H | 4.28668700  | 1.44597900  | -2.23764200 |
| C | 5.06051300  | -0.30339000 | -3.24730900 |
| H | 4.29134800  | -0.24131300 | -4.03371100 |
| H | 5.94693200  | 0.22780200  | -3.62439100 |
| C | 5.39276200  | -1.78326400 | -2.98108500 |
| H | 5.72358600  | -2.27128000 | -3.90938600 |
| H | 6.23399800  | -1.84566700 | -2.27098700 |
| C | 4.17570800  | -2.51917500 | -2.39071600 |
| H | 4.43385400  | -3.56189200 | -2.15454300 |
| H | 3.36732600  | -2.54903600 | -3.13824800 |
| C | 3.66109600  | -1.81147700 | -1.11985400 |
| H | 2.79279900  | -2.34644900 | -0.71627400 |
| H | 4.45082800  | -1.84562300 | -0.35345100 |
| C | -3.35801500 | -0.68758900 | -1.33344800 |
| H | -2.88497900 | -0.29657300 | -2.24908500 |
| C | -3.06365400 | -2.20477700 | -1.32653800 |
| H | -3.49199200 | -2.67593000 | -0.43042600 |
| H | -1.98159800 | -2.36457800 | -1.29771000 |
| C | -3.66219000 | -2.87411600 | -2.58224000 |
| H | -3.15256000 | -2.47710400 | -3.47469200 |
| H | -3.46129800 | -3.95503400 | -2.55428800 |
| C | -5.17680600 | -2.61395400 | -2.69836600 |
| H | -5.57364900 | -3.06306000 | -3.62053600 |
| H | -5.69547300 | -3.10340600 | -1.85725900 |
| C | -5.48109200 | -1.10448400 | -2.66852200 |
| H | -5.05647800 | -0.62914400 | -3.56758500 |
| H | -6.56701000 | -0.93063500 | -2.69839200 |

|   |             |             |             |
|---|-------------|-------------|-------------|
| C | -4.88178400 | -0.43170500 | -1.41347300 |
| H | -5.36970600 | -0.84803600 | -0.51875900 |
| H | -5.10688500 | 0.64385900  | -1.43045500 |
| C | -3.27301600 | 0.06273500  | 1.67736100  |
| H | -2.50630100 | 0.49690500  | 2.34075800  |
| C | -3.42132600 | -1.42645800 | 2.07104700  |
| H | -4.20303400 | -1.89642700 | 1.45421100  |
| H | -2.48674800 | -1.96948800 | 1.87937300  |
| C | -3.81662700 | -1.55674500 | 3.55716200  |
| H | -3.00670800 | -1.14709300 | 4.18073800  |
| H | -3.92221000 | -2.61935900 | 3.82159400  |
| C | -5.12586200 | -0.80018300 | 3.84992800  |
| H | -5.37567500 | -0.86572900 | 4.91887100  |
| H | -5.95218200 | -1.28012000 | 3.29958900  |
| C | -5.01736600 | 0.67426600  | 3.41839400  |
| H | -5.97316900 | 1.19345700  | 3.58298600  |
| H | -4.26521300 | 1.18034200  | 4.04422700  |
| C | -4.60514900 | 0.81060000  | 1.93425700  |
| H | -4.51225300 | 1.87668900  | 1.69089300  |
| H | -5.40479200 | 0.40212200  | 1.29823200  |
| C | -2.86548200 | 2.07513100  | -0.46507900 |
| H | -3.95413000 | 2.15711300  | -0.30817900 |
| C | -2.58280800 | 2.43297000  | -1.94350400 |
| H | -3.10738900 | 1.74435400  | -2.61805800 |
| H | -1.51029700 | 2.31771300  | -2.15635400 |
| C | -3.03376900 | 3.87827900  | -2.24884100 |
| H | -2.80112200 | 4.12067900  | -3.29601100 |
| H | -4.12952800 | 3.94414300  | -2.14392800 |
| C | -2.37253400 | 4.89724400  | -1.30306100 |
| H | -1.28758800 | 4.91190700  | -1.49287600 |
| H | -2.74515900 | 5.91054400  | -1.51264400 |
| C | -2.62316500 | 4.52884000  | 0.17122900  |
| H | -3.69900000 | 4.62649800  | 0.39316700  |
| H | -2.09852300 | 5.22977200  | 0.83688900  |
| C | -2.17023800 | 3.08598900  | 0.47838800  |
| H | -1.08011200 | 3.00665300  | 0.34900700  |
| H | -2.36211100 | 2.84018000  | 1.53102000  |
| C | 0.59228900  | -5.77731700 | -0.57465100 |
| C | 0.36595200  | -5.48464500 | 0.77956700  |
| C | 0.17208900  | -4.15872900 | 1.18137600  |
| C | 0.20602900  | -3.09120300 | 0.24361100  |
| C | 0.43907200  | -3.40852700 | -1.11851600 |
| C | 0.62462600  | -4.73496500 | -1.51806700 |

|   |             |             |             |
|---|-------------|-------------|-------------|
| H | 0.74102800  | -6.80811200 | -0.89344800 |
| H | 0.33860400  | -6.28593900 | 1.51667200  |
| H | -0.00743200 | -3.93004400 | 2.23230900  |
| H | 0.45652800  | -2.59823500 | -1.84527300 |
| H | 0.79676400  | -4.96027700 | -2.56980600 |

***pseudo E 2b-PC***

|    |             |             |             |
|----|-------------|-------------|-------------|
| Ru | -0.02986900 | -0.30297400 | 0.09286200  |
| C  | -0.31648100 | -2.35862000 | 0.21685600  |
| N  | 0.67738600  | -3.29962100 | 0.24710100  |
| N  | -1.48323900 | -3.00544000 | 0.52572900  |
| C  | 0.20937000  | -4.62956500 | 0.71937300  |
| H  | 0.59429800  | -4.81873100 | 1.73063100  |
| H  | 0.57730400  | -5.41649000 | 0.05046700  |
| C  | -1.31402800 | -4.47294200 | 0.69315500  |
| H  | -1.79435200 | -4.80635900 | 1.61955700  |
| H  | -1.78285500 | -4.99891900 | -0.15137900 |
| Cl | 0.45151000  | -0.40806800 | -2.28118000 |
| Cl | 0.05622200  | -0.43980100 | 2.53237600  |
| C  | -2.83881100 | -2.53541000 | 0.39230300  |
| C  | -3.60569800 | -2.30254100 | 1.55614100  |
| C  | -3.42018600 | -2.48595800 | -0.89784900 |
| C  | -4.96448300 | -1.97416300 | 1.39684700  |
| C  | -4.78183300 | -2.16288100 | -1.00075000 |
| C  | -5.57079700 | -1.89901600 | 0.13265600  |
| H  | -5.56274400 | -1.78165300 | 2.28893800  |
| H  | -5.23442800 | -2.11409500 | -1.99216400 |
| C  | 2.06939700  | -3.19124200 | -0.12456500 |
| C  | 3.05816800  | -3.02338000 | 0.87231700  |
| C  | 2.42274300  | -3.47166600 | -1.46841500 |
| C  | 4.40918600  | -3.06184000 | 0.47789900  |
| C  | 3.78468600  | -3.49681600 | -1.80776100 |
| C  | 4.79467200  | -3.28829300 | -0.85234200 |
| H  | 5.17749900  | -2.92885900 | 1.24133500  |
| H  | 4.06062000  | -3.70669700 | -2.84222800 |
| C  | -2.60069100 | -2.77498200 | -2.13545500 |
| H  | -2.19939600 | -3.79877100 | -2.12280100 |
| H  | -3.21647900 | -2.66864900 | -3.03596300 |
| H  | -1.74245200 | -2.09388000 | -2.21565600 |
| C  | -3.00011400 | -2.41342400 | 2.93845400  |
| H  | -3.68391200 | -1.99918900 | 3.68914800  |
| H  | -2.81575300 | -3.46446100 | 3.20968400  |



|   |             |             |             |
|---|-------------|-------------|-------------|
| H | -2.04098200 | -1.88286100 | 2.99711800  |
| C | 2.70625900  | -2.86804700 | 2.33620600  |
| H | 1.83023900  | -2.22570000 | 2.48475600  |
| H | 2.48954100  | -3.84836800 | 2.78868400  |
| H | 3.55176600  | -2.43973300 | 2.88809900  |
| C | 1.37406800  | -3.77857500 | -2.51381200 |
| H | 0.75366700  | -2.89482300 | -2.70917700 |
| H | 1.85099300  | -4.08665200 | -3.45167400 |
| H | 0.70902000  | -4.59150400 | -2.18826000 |
| C | -7.03268700 | -1.52697300 | -0.01264200 |
| H | -7.53340300 | -2.16180900 | -0.75541100 |
| H | -7.56631300 | -1.62727800 | 0.94034200  |
| H | -7.13750400 | -0.48523400 | -0.34902900 |
| C | 6.25691900  | -3.31538000 | -1.25110200 |
| H | 6.90240000  | -3.50793300 | -0.38544100 |
| H | 6.44920700  | -4.09081400 | -2.00371000 |
| H | 6.56396100  | -2.35335800 | -1.68683100 |
| C | -1.78689900 | 0.28046000  | 0.23121300  |
| H | -2.17430000 | 0.27031700  | 1.26575400  |
| C | -2.78270300 | 0.85272500  | -0.68808300 |
| C | -2.72153300 | 0.79044700  | -2.10176100 |
| C | -3.90319100 | 1.49632900  | -0.09749900 |
| C | -3.73291300 | 1.35507800  | -2.88458400 |
| H | -1.87484000 | 0.28910900  | -2.56623200 |
| C | -4.90283600 | 2.08074400  | -0.88283400 |
| H | -3.97482000 | 1.53306400  | 0.98947100  |
| C | -4.82190900 | 2.00938100  | -2.28253900 |
| H | -3.67099300 | 1.29059500  | -3.97039900 |
| H | -5.74463600 | 2.58238900  | -0.40681600 |
| H | -5.60102000 | 2.45609600  | -2.89916400 |
| H | 1.38795100  | 4.77730000  | 3.83821200  |
| C | 1.15366400  | 3.75181200  | 4.17170500  |
| C | -0.32954800 | 3.68078400  | 4.57997900  |
| C | 1.48471700  | 2.75618200  | 3.03663100  |
| H | 1.79947100  | 3.54543100  | 5.03795400  |
| C | -1.24131900 | 3.91791500  | 3.36154100  |
| H | -0.54166500 | 2.68551700  | 5.00115000  |
| H | -0.54384500 | 4.41774000  | 5.36811300  |
| C | 0.57067900  | 3.01089000  | 1.81595900  |
| H | 1.34393700  | 1.72743000  | 3.39197100  |
| H | 2.54041100  | 2.87543200  | 2.75624200  |
| C | -0.91922100 | 2.92667000  | 2.22265200  |
| H | -1.10622400 | 4.95173500  | 3.00082200  |

|   |             |             |             |
|---|-------------|-------------|-------------|
| H | -2.29862600 | 3.81776400  | 3.64892400  |
| P | 0.90950100  | 2.00751300  | 0.22665400  |
| H | 0.76297400  | 4.04823200  | 1.49486700  |
| H | -1.12970700 | 1.90120100  | 2.55273500  |
| H | -1.56909400 | 3.13397500  | 1.35929900  |
| C | 2.79240800  | 1.93742800  | 0.11615800  |
| C | 0.37537500  | 3.38941400  | -0.97958700 |
| C | 3.33302800  | 1.77876100  | -1.32662400 |
| C | 3.35245000  | 0.78225400  | 0.98348100  |
| H | 3.15444500  | 2.89851300  | 0.52257900  |
| C | 0.08202700  | 2.96557900  | -2.43455800 |
| C | 1.28833300  | 4.64564900  | -0.97899500 |
| H | -0.59181900 | 3.68599800  | -0.53487200 |
| C | 4.87677900  | 1.81656600  | -1.33043300 |
| H | 2.97563100  | 0.82479600  | -1.73998500 |
| H | 2.94927600  | 2.56889700  | -1.98229500 |
| C | 4.89470500  | 0.81571200  | 1.00543700  |
| H | 3.02012400  | -0.17224300 | 0.54388600  |
| H | 2.95358600  | 0.80984400  | 2.00320300  |
| C | -0.58996600 | 4.11933100  | -3.20933100 |
| H | 1.01493400  | 2.67957900  | -2.94055400 |
| H | -0.55387000 | 2.07819700  | -2.44401900 |
| C | 0.61557900  | 5.80520100  | -1.74778700 |
| H | 2.24390600  | 4.40556500  | -1.46745400 |
| H | 1.52986800  | 4.97824100  | 0.03979800  |
| C | 5.47497300  | 0.72922100  | -0.41867900 |
| H | 5.21550700  | 2.80898000  | -0.98835800 |
| H | 5.24391800  | 1.69382200  | -2.36005900 |
| H | 5.22938300  | 1.75049500  | 1.48573700  |
| H | 5.27415300  | -0.01145900 | 1.62289300  |
| C | 0.27035800  | 5.39637200  | -3.19203100 |
| H | -1.57187400 | 4.33402200  | -2.75636800 |
| H | -0.78160900 | 3.80264700  | -4.24511900 |
| H | -0.30679100 | 6.09932400  | -1.22055900 |
| H | 1.27869700  | 6.68313600  | -1.74394500 |
| H | 5.23441400  | -0.25973200 | -0.83727300 |
| H | 6.57179300  | 0.81280700  | -0.39251900 |
| H | 1.20453800  | 5.21151400  | -3.74748400 |
| H | -0.24804200 | 6.21878200  | -3.70671100 |

**pseudo Z 2b-PC**

|    |            |             |            |
|----|------------|-------------|------------|
| Ru | 0.08510600 | -0.34010400 | 0.08596200 |
|----|------------|-------------|------------|

|    |             |             |             |   |             |             |             |
|----|-------------|-------------|-------------|---|-------------|-------------|-------------|
| C  | 1.78253300  | 0.38694800  | 0.28435700  | C | -0.98474600 | -3.80329700 | -2.52829500 |
| H  | 2.13879700  | 0.36482000  | 1.32982700  | H | -0.45025900 | -2.85999500 | -2.69811400 |
| C  | 2.77020400  | 1.05717000  | -0.57625000 | H | -1.43033600 | -4.12869800 | -3.47565900 |
| Cl | -0.24095300 | -0.38775400 | -2.31884200 | H | -0.24647100 | -4.55791100 | -2.22134500 |
| Cl | -0.10107700 | -0.40136600 | 2.51886500  | C | -5.88837300 | -3.83856300 | -1.25869900 |
| C  | 0.57481500  | -2.35081000 | 0.23130100  | H | -6.28252200 | -2.89252900 | -1.65801100 |
| P  | -1.16985200 | 1.79226600  | 0.15663900  | H | -6.51196800 | -4.12213400 | -0.40216600 |
| N  | -0.33398000 | -3.37547100 | 0.25137500  | H | -6.01025500 | -4.59888200 | -2.04088000 |
| N  | 1.78843300  | -2.89601000 | 0.55571100  | C | -2.38868500 | -3.20390400 | 2.34997700  |
| C  | 1.74434100  | -4.37467900 | 0.71040600  | H | -3.26654800 | -2.86409400 | 2.91282600  |
| H  | 2.24698400  | -4.67381300 | 1.63682600  | H | -1.57006300 | -2.49505000 | 2.52133300  |
| H  | 2.26131200  | -4.85066800 | -0.13584600 | H | -2.09302700 | -4.17755500 | 2.77127900  |
| C  | 0.24015400  | -4.66168400 | 0.72423800  | C | 2.72417800  | 1.12193200  | -1.99116300 |
| H  | -0.05349900 | -5.47456000 | 0.04952400  | H | 1.89304900  | 0.64768000  | -2.50787100 |
| H  | -0.13410200 | -4.88705300 | 1.73209800  | C | 3.72331900  | 1.78884100  | -2.70611600 |
| C  | 3.10103000  | -2.31178500 | 0.45625300  | H | 3.67304100  | 1.82238700  | -3.79397600 |
| C  | 3.71146400  | -2.21058500 | -0.81722400 | C | 4.78277000  | 2.42420900  | -2.03471600 |
| C  | 5.04823900  | -1.78877300 | -0.87991200 | H | 5.55136700  | 2.95124200  | -2.59896100 |
| H  | 5.52386000  | -1.70107200 | -1.85781100 | C | 4.84410000  | 2.37680400  | -0.63321400 |
| C  | 5.78380500  | -1.47570000 | 0.27699900  | H | 5.65952700  | 2.86695300  | -0.10239900 |
| C  | 5.14689600  | -1.59314900 | 1.52280800  | C | 3.85717100  | 1.69177700  | 0.08366600  |
| H  | 5.70276000  | -1.35562700 | 2.43140800  | H | 3.91284400  | 1.64198100  | 1.17097000  |
| C  | 3.81092400  | -2.01819400 | 1.64174100  | C | -0.98443500 | 2.89339000  | -1.37853100 |
| C  | 2.94503100  | -2.54098400 | -2.07829900 | H | -0.84487900 | 2.13612100  | -2.16794400 |
| H  | 3.57797100  | -2.39263400 | -2.96072700 | C | -2.19111800 | 3.78139100  | -1.77561800 |
| H  | 2.05155000  | -1.90928900 | -2.17838000 | H | -3.11058300 | 3.18873800  | -1.85798700 |
| H  | 2.60350500  | -3.58630700 | -2.08151400 | H | -2.36814700 | 4.54859100  | -1.00581500 |
| C  | 7.22050400  | -1.00439200 | 0.17471500  | C | -1.93018700 | 4.47463200  | -3.13297600 |
| H  | 7.71126300  | -1.00639600 | 1.15554900  | H | -1.85482400 | 3.70417900  | -3.91708000 |
| H  | 7.26650400  | 0.01918900  | -0.22432300 | H | -2.79107800 | 5.10928000  | -3.39108100 |
| H  | 7.80276700  | -1.64464100 | -0.50130800 | C | -0.63503200 | 5.30673300  | -3.11379100 |
| C  | 3.16480000  | -2.15819800 | 3.00324300  | H | -0.45414300 | 5.75350200  | -4.10245600 |
| H  | 2.17432500  | -1.68505600 | 3.02535800  | H | -0.75074000 | 6.14148300  | -2.40254800 |
| H  | 3.79582300  | -1.69955100 | 3.77400000  | C | 0.56283500  | 4.43946200  | -2.68607700 |
| H  | 3.03108200  | -3.21617300 | 3.27649000  | H | 1.47590400  | 5.04922800  | -2.62091900 |
| C  | -1.72861000 | -3.37400600 | -0.12148800 | H | 0.74798800  | 3.66630700  | -3.44809200 |
| C  | -2.05717100 | -3.62854800 | -1.47689100 | C | 0.29988900  | 3.75695500  | -1.32713000 |
| C  | -3.41206300 | -3.76174700 | -1.81970600 | H | 0.18451400  | 4.53837600  | -0.55958300 |
| H  | -3.67039100 | -3.95176700 | -2.86253600 | H | 1.16498600  | 3.14714200  | -1.04330200 |
| C  | -4.43416600 | -3.69307800 | -0.85704300 | C | -0.91298700 | 2.82022800  | 1.71906800  |
| C  | -4.06841500 | -3.49107100 | 0.48293800  | H | -1.25891200 | 2.11328600  | 2.49064600  |
| H  | -4.84356900 | -3.46832700 | 1.25078300  | C | 0.56437600  | 3.11747000  | 2.06560200  |
| C  | -2.72662000 | -3.33763000 | 0.88034800  | H | 1.13955500  | 2.18571600  | 2.02429200  |

|   |             |             |             |
|---|-------------|-------------|-------------|
| H | 0.99907500  | 3.81512900  | 1.33621900  |
| C | 0.67145800  | 3.72869800  | 3.47887400  |
| H | 0.33494400  | 2.98174200  | 4.21511000  |
| H | 1.72481600  | 3.94975300  | 3.70671700  |
| C | -0.18206400 | 5.00458000  | 3.61253900  |
| H | -0.12442400 | 5.40008900  | 4.63724200  |
| H | 0.22270300  | 5.78497200  | 2.94665300  |
| C | -1.64859800 | 4.72759100  | 3.23153700  |
| H | -2.23967500 | 5.65442600  | 3.27834300  |
| H | -2.08901200 | 4.03037000  | 3.96266600  |
| C | -1.76165800 | 4.11122700  | 1.81881500  |
| H | -1.40528800 | 4.84501500  | 1.07965600  |
| H | -2.81815200 | 3.91308000  | 1.59040200  |
| C | -3.03175600 | 1.46834100  | 0.20527300  |
| H | -3.48978100 | 2.46373800  | 0.07988500  |
| C | -3.49815000 | 0.58099000  | -0.97479500 |
| H | -3.08839500 | 0.93602100  | -1.92927200 |
| H | -3.10824400 | -0.43890300 | -0.83913600 |
| C | -5.03948100 | 0.54358400  | -1.03211200 |
| H | -5.41867500 | 1.55819100  | -1.24130700 |
| H | -5.36430500 | -0.09382400 | -1.86766100 |
| C | -5.63830000 | 0.03412000  | 0.29333100  |
| H | -6.73723200 | 0.07829200  | 0.25870200  |
| H | -5.36138200 | -1.02252500 | 0.42264500  |
| C | -5.11305900 | 0.83994500  | 1.49721200  |
| H | -5.49228100 | 0.41111500  | 2.43663900  |
| H | -5.49984600 | 1.87143400  | 1.44118800  |
| C | -3.56863700 | 0.88998600  | 1.53523100  |
| H | -3.15585900 | -0.11579300 | 1.69584900  |
| H | -3.25067100 | 1.49989600  | 2.39043100  |

**1a-Inact-C PPh<sub>3</sub>Cl<sub>2</sub>Ru=CHPh**

|    |             |             |             |
|----|-------------|-------------|-------------|
| Ru | -0.86549800 | -0.67211400 | -0.83488000 |
| Cl | -0.79200800 | 0.44474500  | -2.86203600 |
| Cl | -0.82214600 | -2.81573300 | 0.03894900  |
| P  | 1.00146300  | 0.07922700  | 0.09285100  |
| C  | -1.98625800 | 0.31471000  | 0.25946300  |
| H  | -1.60860900 | 1.11052800  | 0.91961900  |
| C  | -3.44174800 | 0.18643700  | 0.23731000  |
| C  | -4.23571500 | 1.21830900  | 0.80354100  |
| C  | -5.63188800 | 1.14790500  | 0.77153500  |
| C  | -6.26677500 | 0.04141600  | 0.18394800  |
| C  | -5.49641100 | -0.99784900 | -0.36646700 |

|   |             |             |             |
|---|-------------|-------------|-------------|
| C | -4.10165000 | -0.93005100 | -0.33986000 |
| H | -7.35386300 | -0.01595200 | 0.16294500  |
| H | -6.22543400 | 1.95110400  | 1.20565400  |
| H | -3.74169300 | 2.07696600  | 1.25788700  |
| H | -3.50934900 | -1.75564700 | -0.73468700 |
| H | -5.98666200 | -1.86405400 | -0.80754600 |
| C | 1.06006500  | 1.89953600  | 0.42378600  |
| C | 1.65628100  | 2.41727200  | 1.59266200  |
| C | 0.49970200  | 2.78768800  | -0.51858800 |
| C | 1.70050700  | 3.80280200  | 1.80733400  |
| H | 2.08127600  | 1.74434100  | 2.33432900  |
| C | 0.55314300  | 4.17128100  | -0.29978600 |
| H | 0.02478000  | 2.39309200  | -1.41602600 |
| C | 1.15146200  | 4.68171900  | 0.86231300  |
| H | 2.16063700  | 4.19127400  | 2.71465600  |
| H | 0.12007200  | 4.84722500  | -1.03544100 |
| H | 1.18424700  | 5.75667300  | 1.03341400  |
| C | 1.48398800  | -0.67514800 | 1.71056700  |
| C | 2.83591700  | -0.90751300 | 2.03496500  |
| C | 0.48423700  | -0.98525100 | 2.65312400  |
| C | 3.18010700  | -1.43525400 | 3.28841900  |
| H | 3.61717700  | -0.68355800 | 1.31069800  |
| C | 0.83281000  | -1.50644000 | 3.90590600  |
| H | -0.56318000 | -0.84083500 | 2.39527900  |
| C | 2.18029400  | -1.73277200 | 4.22582300  |
| H | 4.22704100  | -1.61643400 | 3.52713700  |
| H | 0.05148900  | -1.75013400 | 4.62380200  |
| H | 2.44857400  | -2.14742200 | 5.19629600  |
| C | 2.43189900  | -0.28029400 | -1.01134400 |
| C | 2.66090800  | -1.62644900 | -1.37051900 |
| C | 3.26074800  | 0.73009100  | -1.53357900 |
| C | 3.71470200  | -1.95251300 | -2.23314700 |
| H | 2.01549800  | -2.41165700 | -0.97631800 |
| C | 4.31251300  | 0.39610900  | -2.40003800 |
| H | 3.08696400  | 1.77102000  | -1.26862500 |
| C | 4.54136300  | -0.94214300 | -2.75006600 |
| H | 3.88518500  | -2.99271900 | -2.50556600 |
| H | 4.94907800  | 1.18322800  | -2.80112100 |
| H | 5.35616000  | -1.19723300 | -3.42576700 |

**1b-Inact-C PCy<sub>3</sub>Cl<sub>2</sub>Ru=CHPh**

|    |            |             |             |
|----|------------|-------------|-------------|
| Ru | 1.03435600 | -1.02535200 | -0.16289200 |
|----|------------|-------------|-------------|



|   |             |             |             |
|---|-------------|-------------|-------------|
| C | -4.62494600 | -2.22097300 | -0.14814700 |
| H | -4.53101700 | -2.38764400 | 2.00485500  |
| H | -4.36505600 | -2.00172000 | -2.28297700 |
| C | 3.00888600  | -0.86327700 | -0.03158300 |
| C | 3.61951400  | -0.55146200 | 1.20618600  |
| C | 3.65659300  | -0.58306700 | -1.26105800 |
| C | 4.82822900  | 0.16787700  | 1.18395000  |
| C | 4.86498500  | 0.12917100  | -1.22633300 |
| C | 5.45299500  | 0.53885200  | -0.01635400 |
| H | 5.29243600  | 0.43497100  | 2.13439900  |
| H | 5.36024800  | 0.36523600  | -2.16903800 |
| C | -1.66141100 | -1.81117500 | -2.56096800 |
| H | -0.95748900 | -2.63618000 | -2.73980300 |
| H | -2.33235400 | -1.75112700 | -3.42533100 |
| H | -1.07309800 | -0.88518800 | -2.51345100 |
| C | -1.84785200 | -2.27574200 | 2.50974400  |
| H | -2.57729300 | -2.35466400 | 3.32385200  |
| H | -1.16690500 | -3.13567900 | 2.58250800  |
| H | -1.24567500 | -1.37129100 | 2.66701100  |
| C | 3.07194300  | -1.04175400 | 2.53029100  |
| H | 1.99243200  | -1.21043000 | 2.49713400  |
| H | 3.56981900  | -1.98292200 | 2.81269800  |
| H | 3.26577100  | -0.31125300 | 3.32314100  |
| C | 3.10431400  | -1.08686300 | -2.57686600 |
| H | 2.07462300  | -0.75010500 | -2.73499900 |
| H | 3.71615300  | -0.72310500 | -3.41023800 |
| H | 3.11392800  | -2.18691200 | -2.60853800 |
| C | -6.13568300 | -2.32498800 | -0.21847500 |
| H | -6.44549300 | -3.35944700 | -0.42761700 |
| H | -6.60081800 | -2.02603800 | 0.72869000  |
| H | -6.54264700 | -1.69313300 | -1.01785500 |
| C | 6.72606200  | 1.36052500  | -0.01113300 |
| H | 7.31200000  | 1.18451700  | 0.89938800  |
| H | 7.35536800  | 1.12724500  | -0.87902500 |
| H | 6.49298300  | 2.43461600  | -0.05200200 |
| C | -1.57507500 | 1.04441500  | 0.04354900  |
| H | -2.24809100 | 0.18425400  | 0.11594900  |
| C | -2.24828700 | 2.33880600  | 0.01440900  |
| C | -1.56441600 | 3.55927100  | -0.22994000 |
| C | -3.64709000 | 2.39017000  | 0.25696100  |
| C | -2.24930000 | 4.77585900  | -0.21723100 |
| H | -0.49834100 | 3.54419400  | -0.45640000 |
| C | -4.32876000 | 3.61078300  | 0.27164200  |

|   |             |            |             |
|---|-------------|------------|-------------|
| H | -4.18411100 | 1.45955300 | 0.43904500  |
| C | -3.63199100 | 4.80742900 | 0.03626700  |
| H | -1.71010200 | 5.70167500 | -0.41046000 |
| H | -5.40058500 | 3.63203300 | 0.46365600  |
| H | -4.16268200 | 5.75823900 | 0.04464300  |

### PPh<sub>3</sub>

|   |             |             |             |
|---|-------------|-------------|-------------|
| C | -0.93671300 | -1.37935800 | -0.41220000 |
| C | 1.66503800  | -0.12126800 | -0.41297000 |
| C | -0.72563200 | 1.50219900  | -0.41318000 |
| C | -0.48883800 | -2.08601000 | 0.72150700  |
| C | -2.16060600 | -1.75820200 | -1.00595200 |
| C | 2.04839800  | 0.61288900  | 0.72743300  |
| C | 2.60850000  | -0.98574700 | -1.00938200 |
| C | -0.42753800 | 2.75381800  | -0.99486400 |
| C | -1.57753700 | 1.46505200  | 0.70901400  |
| C | -1.25121500 | -3.13694300 | 1.25351000  |
| H | 0.45769700  | -1.81688100 | 1.18714800  |
| C | -2.92845600 | -2.79820400 | -0.46555200 |
| H | -2.51023700 | -1.23525800 | -1.89631300 |
| C | 3.33851100  | 0.47722600  | 1.26225500  |
| H | 1.33963500  | 1.29335900  | 1.19662400  |
| C | 3.89185600  | -1.13163500 | -0.46626900 |
| H | 2.33429600  | -1.54507000 | -1.90402600 |
| C | -0.94597400 | 3.93788600  | -0.45429000 |
| H | 0.21252000  | 2.79778000  | -1.87625300 |
| C | -2.10816700 | 2.65025200  | 1.24105100  |
| H | -1.82924900 | 0.50908500  | 1.16508900  |
| C | -2.47339400 | -3.49301200 | 0.66567300  |
| H | -0.88927600 | -3.67479900 | 2.12886800  |
| H | -3.87238800 | -3.07350000 | -0.93388600 |
| C | 4.26147100  | -0.39728200 | 0.67109100  |
| H | 3.61944400  | 1.05404300  | 2.14258000  |
| H | 4.60469700  | -1.80724700 | -0.93697200 |
| C | -1.79126200 | 3.88869500  | 0.66506400  |
| H | -0.70084800 | 4.89464200  | -0.91329200 |
| H | -2.76726300 | 2.60362200  | 2.10707100  |
| H | -3.06291000 | -4.30918100 | 1.08042900  |
| H | 5.26194400  | -0.50108700 | 1.08819100  |
| H | -2.20421700 | 4.80701500  | 1.07961500  |
| P | 0.00103400  | 0.00008900  | -1.22710100 |

**PCy<sub>3</sub>**

|   |             |             |             |
|---|-------------|-------------|-------------|
| P | -0.23506200 | -0.06745100 | -1.04691700 |
| C | 0.75263000  | -1.50550100 | -0.29247700 |
| H | 0.01572900  | -2.32668200 | -0.34717400 |
| C | 1.23555400  | -1.42169100 | 1.17287300  |
| H | 0.41005500  | -1.13817400 | 1.84147000  |
| H | 2.00277000  | -0.63674500 | 1.25716900  |
| C | 1.85210300  | -2.76280000 | 1.63068800  |
| H | 2.20397300  | -2.67897300 | 2.66973300  |
| H | 1.07175000  | -3.54153700 | 1.62057700  |
| C | 3.00850700  | -3.18980100 | 0.70651800  |
| H | 3.41164700  | -4.16225800 | 1.02487200  |
| H | 3.83026300  | -2.46036600 | 0.79758500  |
| C | 2.55055900  | -3.25555400 | -0.76330000 |
| H | 3.39732400  | -3.51529900 | -1.41566100 |
| H | 1.80512600  | -4.06032000 | -0.87406500 |
| C | 1.92216500  | -1.92229100 | -1.22131200 |
| H | 1.56328100  | -2.00555300 | -2.25663000 |
| H | 2.69751200  | -1.14074600 | -1.21622200 |
| C | -1.84091600 | -0.12357400 | -0.03396000 |
| H | -1.61496300 | -0.08554100 | 1.04594300  |
| C | -2.61053100 | -1.43635300 | -0.32570300 |
| H | -2.01319000 | -2.30979200 | -0.02961800 |
| H | -2.77374600 | -1.51792800 | -1.41288700 |
| C | -3.97112000 | -1.48569800 | 0.40050700  |
| H | -4.49230100 | -2.42044800 | 0.14621800  |
| H | -3.80069500 | -1.50288800 | 1.48957100  |
| C | -4.84445500 | -0.26952700 | 0.04316800  |
| H | -5.10094800 | -0.30974600 | -1.02807900 |
| H | -5.79262600 | -0.30111000 | 0.59943600  |
| C | -4.09515000 | 1.04285500  | 0.33518300  |
| H | -3.92950000 | 1.13223900  | 1.42148600  |
| H | -4.70534900 | 1.90777000  | 0.03569900  |
| C | -2.73439100 | 1.09111100  | -0.39241000 |
| H | -2.22265000 | 2.03271100  | -0.14946000 |
| H | -2.90469200 | 1.09565100  | -1.48172600 |
| C | 0.55263700  | 1.56684900  | -0.47452400 |
| H | -0.05797700 | 2.30316400  | -1.02859000 |
| C | 0.51730200  | 1.98610200  | 1.01534600  |
| H | 1.12845300  | 1.29799400  | 1.61574700  |
| H | -0.50587100 | 1.92964600  | 1.41168800  |
| C | 1.06160100  | 3.42268600  | 1.19040700  |
| H | 0.39384700  | 4.12780800  | 0.66836400  |

|   |            |            |             |
|---|------------|------------|-------------|
| H | 1.04571500 | 3.70026700 | 2.25486800  |
| C | 2.48743000 | 3.56140400 | 0.62305400  |
| H | 2.83991400 | 4.59784600 | 0.72775700  |
| H | 3.17319900 | 2.93119000 | 1.21305500  |
| C | 2.54233900 | 3.12227700 | -0.85250400 |
| H | 3.57417900 | 3.17740900 | -1.22967000 |
| H | 1.94219500 | 3.81746200 | -1.46194500 |
| C | 1.99211800 | 1.69252900 | -1.03101900 |
| H | 2.01300900 | 1.40688900 | -2.09275800 |
| H | 2.65020100 | 0.98967000 | -0.49620400 |

**PBEh****1a-PC**

|    |             |             |             |
|----|-------------|-------------|-------------|
| Ru | 0.13997100  | -0.08909800 | 0.04314400  |
| Cl | 0.15565900  | 0.18520900  | -2.32693500 |
| Cl | 0.31804300  | -1.17347900 | 2.16981700  |
| P  | -2.22723400 | -0.53764800 | 0.02207900  |
| P  | 2.50978900  | -0.14291900 | -0.04739300 |
| C  | 0.10299300  | 1.59997000  | 0.75408800  |
| H  | 0.71086100  | 1.73258700  | 1.66534900  |
| C  | -1.87566000 | 5.25319600  | -0.20354300 |
| C  | -1.26678600 | 5.07445900  | 1.04000300  |
| C  | -0.62149000 | 3.87796300  | 1.32515500  |
| C  | -0.59442000 | 2.82575900  | 0.38586300  |
| C  | -1.20945700 | 3.02548900  | -0.86399500 |
| C  | -1.83595300 | 4.23171900  | -1.15362200 |
| H  | -2.37427000 | 6.19106800  | -0.43363900 |
| H  | -1.28841200 | 5.87060100  | 1.77894900  |
| H  | -0.13146500 | 3.74009100  | 2.28679000  |
| H  | -1.16465100 | 2.23278000  | -1.60352600 |
| H  | -2.30215800 | 4.37269700  | -2.12467900 |
| C  | 3.42666600  | 1.16267300  | -0.95227200 |
| C  | 4.82955800  | 1.14802200  | -0.95802500 |
| C  | 2.75138400  | 2.21078000  | -1.58204800 |
| C  | 5.54129500  | 2.15618900  | -1.59979400 |
| H  | 5.36595000  | 0.35074300  | -0.44939500 |
| C  | 3.46844900  | 3.22556500  | -2.21647000 |
| H  | 1.66702600  | 2.22302800  | -1.58874800 |
| C  | 4.86005800  | 3.19858800  | -2.23036400 |
| H  | 6.62758500  | 2.13299700  | -1.60015400 |
| H  | 2.93187100  | 4.03607300  | -2.70161000 |
| H  | 5.41618500  | 3.98922300  | -2.72690000 |

|   |             |             |             |
|---|-------------|-------------|-------------|
| C | 3.42357600  | -0.13368000 | 1.54770500  |
| C | 4.00143000  | -1.27244700 | 2.11235100  |
| C | 3.52150000  | 1.08691300  | 2.22892700  |
| C | 4.66252900  | -1.19282300 | 3.33737200  |
| H | 3.94553500  | -2.22649400 | 1.59875300  |
| C | 4.17851300  | 1.16358200  | 3.45274700  |
| H | 3.10108400  | 1.98983700  | 1.79264300  |
| C | 4.75036300  | 0.02148100  | 4.01223900  |
| H | 5.10878500  | -2.08731500 | 3.76314600  |
| H | 4.24833600  | 2.11809400  | 3.96719800  |
| H | 5.26447300  | 0.08023000  | 4.96753200  |
| C | 2.93402700  | -1.72412800 | -0.86917700 |
| C | 2.42280600  | -2.91184800 | -0.32363600 |
| C | 3.64915600  | -1.77568400 | -2.06972800 |
| C | 2.65746800  | -4.13096300 | -0.95404300 |
| H | 1.83445200  | -2.87667600 | 0.59125900  |
| C | 3.87393400  | -2.99819200 | -2.69958100 |
| H | 4.01858500  | -0.86174300 | -2.52345200 |
| C | 3.38544400  | -4.17747300 | -2.14181400 |
| H | 2.26046100  | -5.04448300 | -0.51987000 |
| H | 4.42716400  | -3.02516600 | -3.63426900 |
| H | 3.56101900  | -5.12850200 | -2.63703800 |
| C | -2.50118200 | -2.27914300 | -0.51151300 |
| C | -1.72352500 | -3.27116800 | 0.10263300  |
| C | -3.45850100 | -2.65518100 | -1.45986300 |
| C | -1.90018900 | -4.61072500 | -0.23254800 |
| H | -0.99330500 | -2.99193000 | 0.85912700  |
| C | -3.62741000 | -3.99795100 | -1.79556900 |
| H | -4.08000200 | -1.90514800 | -1.93849800 |
| C | -2.84858700 | -4.97833200 | -1.18558400 |
| H | -1.29383900 | -5.36889400 | 0.25567000  |
| H | -4.37379900 | -4.27479100 | -2.53518600 |
| H | -2.98195900 | -6.02387600 | -1.44957800 |
| C | -3.09344800 | -0.47625100 | 1.64092000  |
| C | -4.24223200 | -1.24533300 | 1.86351400  |
| C | -2.63858100 | 0.37765700  | 2.64878400  |
| C | -4.92937500 | -1.15174000 | 3.07090900  |
| H | -4.59924400 | -1.92350100 | 1.09314400  |
| C | -3.33104500 | 0.47540400  | 3.85400800  |
| H | -1.72945400 | 0.94993100  | 2.49856900  |
| C | -4.47648100 | -0.28788900 | 4.06751600  |
| H | -5.81701600 | -1.75691900 | 3.23352300  |
| H | -2.96354400 | 1.13870700  | 4.63193200  |

|   |             |             |             |
|---|-------------|-------------|-------------|
| H | -5.01061600 | -0.21728500 | 5.01119000  |
| C | -3.33346400 | 0.45397200  | -1.05761700 |
| C | -4.31454300 | 1.28990400  | -0.51044700 |
| C | -3.16929300 | 0.42272400  | -2.45140700 |
| C | -5.12120400 | 2.07010800  | -1.33693800 |
| H | -4.45250900 | 1.33642300  | 0.56517900  |
| C | -3.98104700 | 1.20083900  | -3.27268900 |
| H | -2.39389500 | -0.19511600 | -2.89183700 |
| C | -4.96003600 | 2.02577100  | -2.71940900 |
| H | -5.87734300 | 2.71256900  | -0.89406800 |
| H | -3.84266900 | 1.16218700  | -4.34978800 |
| H | -5.59265200 | 2.63072000  | -3.36355600 |

### 1b-PC

|    |             |             |             |
|----|-------------|-------------|-------------|
| Ru | -0.02827700 | -0.00691800 | 0.08338000  |
| Cl | -0.07382400 | -0.27881800 | -2.31548900 |
| Cl | -0.01996200 | 0.82345200  | 2.35977100  |
| P  | 2.34893100  | 0.45283000  | 0.03187800  |
| P  | -2.42746900 | 0.28319000  | -0.00394300 |
| C  | -0.01184700 | -1.70976700 | 0.76103900  |
| H  | -0.19849300 | -1.74248900 | 1.84753700  |
| C  | 3.25454300  | 0.15352900  | 1.63574900  |
| H  | 2.72327800  | 0.84607400  | 2.30472200  |
| C  | 4.74257500  | 0.52842100  | 1.62634000  |
| H  | 4.89673300  | 1.53092200  | 1.21032600  |
| H  | 5.29630000  | -0.16873300 | 0.98294200  |
| C  | 5.32383400  | 0.46502900  | 3.04158900  |
| H  | 6.39239400  | 0.71270200  | 3.01487600  |
| H  | 4.83882700  | 1.23209200  | 3.66268300  |
| C  | 5.10789500  | -0.90637500 | 3.67662300  |
| H  | 5.49542300  | -0.91472700 | 4.70273100  |
| H  | 5.68487800  | -1.65809000 | 3.11764300  |
| C  | 3.62994400  | -1.29065100 | 3.66022600  |
| H  | 3.49153700  | -2.29503200 | 4.07920400  |
| H  | 3.06484300  | -0.60077000 | 4.30296400  |
| C  | 3.04876800  | -1.23683800 | 2.24655100  |
| H  | 1.97966300  | -1.46145300 | 2.27920500  |
| H  | 3.52689400  | -2.00745500 | 1.63027000  |
| C  | 2.61106200  | 2.28467200  | -0.25498000 |
| H  | 3.67888600  | 2.39300600  | -0.49548500 |
| C  | 2.32801900  | 3.17879200  | 0.95889000  |
| H  | 2.93253600  | 2.87125300  | 1.81885300  |
| H  | 1.28236000  | 3.06750000  | 1.27054300  |

|   |             |             |             |   |             |             |             |
|---|-------------|-------------|-------------|---|-------------|-------------|-------------|
| C | 2.63372200  | 4.64224400  | 0.63200800  | C | -4.84051300 | -0.44155400 | -1.39531800 |
| H | 2.40573900  | 5.26748700  | 1.50384900  | H | -5.33273900 | -0.84094700 | -0.49818800 |
| H | 3.71205400  | 4.75332100  | 0.44235800  | H | -5.06375300 | 0.63139900  | -1.42534500 |
| C | 1.85765900  | 5.12912800  | -0.58878800 | C | -3.24779600 | 0.07512600  | 1.66427300  |
| H | 0.78375500  | 5.13088200  | -0.35294700 | H | -2.47861500 | 0.50347700  | 2.32449200  |
| H | 2.12652300  | 6.16599100  | -0.82523700 | C | -3.40409500 | -1.39766100 | 2.06446700  |
| C | 2.10648000  | 4.22623800  | -1.79478000 | H | -4.18886500 | -1.86597500 | 1.45484300  |
| H | 3.15743800  | 4.31834100  | -2.10744400 | H | -2.47869000 | -1.95086200 | 1.87035300  |
| H | 1.49918900  | 4.54859400  | -2.64974600 | C | -3.79077400 | -1.51785500 | 3.53902100  |
| C | 1.80551300  | 2.76315900  | -1.47087500 | H | -2.97548700 | -1.11570500 | 4.15661600  |
| H | 1.99027300  | 2.12927800  | -2.34514300 | H | -3.90249800 | -2.57520300 | 3.80980500  |
| H | 0.73309200  | 2.65513600  | -1.25502900 | C | -5.07982000 | -0.75431900 | 3.83336200  |
| C | 3.26510400  | -0.34175400 | -1.39492300 | H | -5.32514600 | -0.81239900 | 4.90085100  |
| H | 2.48635600  | -0.35343800 | -2.17234900 | H | -5.91260600 | -1.23029600 | 3.29435700  |
| C | 4.48352600  | 0.39417300  | -1.97118200 | C | -4.96437000 | 0.70369700  | 3.39575700  |
| H | 5.29026700  | 0.44140400  | -1.22740300 | H | -5.91197500 | 1.23057400  | 3.56399200  |
| H | 4.23272500  | 1.42683200  | -2.23499000 | H | -4.20935300 | 1.20770200  | 4.01577000  |
| C | 4.99603400  | -0.31884100 | -3.22666200 | C | -4.55953800 | 0.83062300  | 1.92359700  |
| H | 4.22484400  | -0.25787500 | -4.00790700 | H | -4.45847000 | 1.89279100  | 1.67799100  |
| H | 5.87735500  | 0.20721100  | -3.61436000 | H | -5.36528700 | 0.43368400  | 1.29195100  |
| C | 5.32363200  | -1.78589600 | -2.96087800 | C | -2.83748800 | 2.04880600  | -0.47429200 |
| H | 5.64515100  | -2.27728400 | -3.88731100 | H | -3.92003700 | 2.14705500  | -0.30466000 |
| H | 6.17166100  | -1.84850700 | -2.26275700 | C | -2.57670700 | 2.38723500  | -1.94783300 |
| C | 4.12342000  | -2.51149400 | -2.35833400 | H | -3.12004100 | 1.70249700  | -2.60707800 |
| H | 4.38038200  | -3.55153300 | -2.12232500 | H | -1.51330600 | 2.25053600  | -2.18140300 |
| H | 3.30826600  | -2.54674100 | -3.09501400 | C | -3.00428000 | 3.82338400  | -2.25812300 |
| C | 3.62706600  | -1.80315500 | -1.09772700 | H | -2.78665300 | 4.05147700  | -3.30871100 |
| H | 2.76719900  | -2.33653300 | -0.68108600 | H | -4.09496000 | 3.90903000  | -2.14029100 |
| H | 4.42230600  | -1.83645600 | -0.34081300 | C | -2.31978300 | 4.83255100  | -1.34076500 |
| C | -3.33096000 | -0.69906700 | -1.30613800 | H | -1.23961500 | 4.82799200  | -1.54593500 |
| H | -2.85476000 | -0.32296300 | -2.22351700 | H | -2.67397900 | 5.84801600  | -1.55666200 |
| C | -3.04214800 | -2.20392900 | -1.28474000 | C | -2.55365900 | 4.48713200  | 0.12785700  |
| H | -3.46744600 | -2.66651500 | -0.38586600 | H | -3.62165200 | 4.60758000  | 0.36399900  |
| H | -1.96374000 | -2.36816200 | -1.25276500 | H | -2.01170400 | 5.18485300  | 0.77824900  |
| C | -3.63505600 | -2.88008400 | -2.52196000 | C | -2.12606000 | 3.05339000  | 0.44208700  |
| H | -3.12248300 | -2.49712000 | -3.41608700 | H | -1.04019400 | 2.95907200  | 0.30701100  |
| H | -3.43531200 | -3.95799700 | -2.48402400 | H | -2.30451600 | 2.82225300  | 1.49780900  |
| C | -5.13514400 | -2.61969900 | -2.64445800 | C | 0.60231900  | -5.72823000 | -0.56796400 |
| H | -5.53145400 | -3.07833000 | -3.55873400 | C | 0.37099400  | -5.43589500 | 0.77545300  |
| H | -5.65644600 | -3.09939300 | -1.80255200 | C | 0.17362400  | -4.11701200 | 1.17022300  |
| C | -5.43503700 | -1.12272800 | -2.63056300 | C | 0.20672800  | -3.06073100 | 0.23728700  |
| H | -5.01235600 | -0.65907000 | -3.53378900 | C | 0.44398700  | -3.37655900 | -1.11374400 |
| H | -6.51761500 | -0.94744100 | -2.66599600 | C | 0.63545100  | -4.69512200 | -1.50759200 |



|   |             |             |             |
|---|-------------|-------------|-------------|
| H | 0.75558100  | -6.75698900 | -0.88307200 |
| H | 0.34336600  | -6.23337700 | 1.51285000  |
| H | -0.00831900 | -3.88811900 | 2.21817700  |
| H | 0.46315100  | -2.57041200 | -1.84136200 |
| H | 0.81301600  | -4.92094500 | -2.55567900 |

**pseudo E-2b-PC**

|    |             |             |             |
|----|-------------|-------------|-------------|
| Ru | -0.01938300 | -0.29975200 | 0.10529900  |
| C  | -0.26764600 | -2.35457000 | 0.23157900  |
| N  | 0.73775700  | -3.25948300 | 0.26666800  |
| N  | -1.41018000 | -3.02020900 | 0.51951700  |
| C  | 0.30428900  | -4.58220200 | 0.73176400  |
| H  | 0.67589600  | -4.75827700 | 1.74839700  |
| H  | 0.70152800  | -5.36612000 | 0.07978800  |
| C  | -1.21179700 | -4.46497200 | 0.68130400  |
| H  | -1.69793900 | -4.82105900 | 1.59364000  |
| H  | -1.65215900 | -5.00027600 | -0.17022100 |
| Cl | 0.43254000  | -0.41630900 | -2.25727500 |
| Cl | 0.07774200  | -0.44294600 | 2.52559000  |
| C  | -2.75878500 | -2.57306600 | 0.38589500  |
| C  | -3.52460300 | -2.34137200 | 1.53894700  |
| C  | -3.33455900 | -2.52797800 | -0.89647800 |
| C  | -4.87287300 | -2.00994900 | 1.37757100  |
| C  | -4.68555500 | -2.20155800 | -1.00338100 |
| C  | -5.47017800 | -1.93092600 | 0.11963200  |
| H  | -5.47182800 | -1.81615100 | 2.26554500  |
| H  | -5.13484500 | -2.15079900 | -1.99324300 |
| C  | 2.11081300  | -3.11565900 | -0.10814500 |
| C  | 3.09530600  | -2.91502100 | 0.87326800  |
| C  | 2.46251500  | -3.38572900 | -1.44507500 |
| C  | 4.43509300  | -2.90507800 | 0.47135600  |
| C  | 3.81250100  | -3.36286300 | -1.79357900 |
| C  | 4.81506300  | -3.11688600 | -0.85284900 |
| H  | 5.20236400  | -2.74510700 | 1.22670300  |
| H  | 4.08776500  | -3.56398700 | -2.82710300 |
| C  | -2.51953700 | -2.81765800 | -2.12284300 |
| H  | -2.09028200 | -3.82612700 | -2.09555500 |
| H  | -3.13816200 | -2.74533100 | -3.02112800 |
| H  | -1.68215100 | -2.11801200 | -2.22376300 |
| C  | -2.92849700 | -2.45677400 | 2.91216300  |
| H  | -3.61423700 | -2.05484700 | 3.66321400  |
| H  | -2.73761800 | -3.50473900 | 3.17689800  |

|   |             |             |             |
|---|-------------|-------------|-------------|
| H | -1.97629300 | -1.92098300 | 2.98253300  |
| C | 2.75440000  | -2.77597500 | 2.32898800  |
| H | 1.86339600  | -2.16322000 | 2.49097800  |
| H | 2.57469400  | -3.76072100 | 2.77995200  |
| H | 3.58660700  | -2.32271200 | 2.87519900  |
| C | 1.42570800  | -3.73211600 | -2.47281300 |
| H | 0.79305000  | -2.86520100 | -2.68816800 |
| H | 1.90218400  | -4.05296600 | -3.40296900 |
| H | 0.77418000  | -4.54478800 | -2.13102400 |
| C | -6.91497700 | -1.54529700 | -0.03184000 |
| H | -7.41940400 | -2.17064600 | -0.77557500 |
| H | -7.45603100 | -1.63796500 | 0.91422600  |
| H | -7.00297600 | -0.50495100 | -0.36769400 |
| C | 6.26179300  | -3.08866200 | -1.26120100 |
| H | 6.92183400  | -3.26565200 | -0.40710300 |
| H | 6.47583000  | -3.84656700 | -2.02125500 |
| H | 6.53017800  | -2.11462600 | -1.68803000 |
| C | -1.76352700 | 0.24168800  | 0.24824100  |
| H | -2.14227400 | 0.22826600  | 1.28215100  |
| C | -2.78005200 | 0.78594500  | -0.65803500 |
| C | -2.73547500 | 0.71735800  | -2.06169000 |
| C | -3.89627800 | 1.40394200  | -0.05973200 |
| C | -3.76197200 | 1.25395400  | -2.82947200 |
| H | -1.88711900 | 0.23270700  | -2.53462100 |
| C | -4.91368900 | 1.95900400  | -0.82883900 |
| H | -3.95521700 | 1.44402100  | 1.02550000  |
| C | -4.84972400 | 1.88252700  | -2.21959800 |
| H | -3.71216100 | 1.18642300  | -3.91312800 |
| H | -5.75770200 | 2.44341700  | -0.34488500 |
| H | -5.64446900 | 2.30841500  | -2.82665600 |
| H | 1.32986800  | 4.77452000  | 3.78416300  |
| C | 1.10791100  | 3.75006400  | 4.12068300  |
| C | -0.35861400 | 3.66652600  | 4.53626500  |
| C | 1.43919200  | 2.76282600  | 2.99778600  |
| H | 1.76047400  | 3.55741900  | 4.98129500  |
| C | -1.27602600 | 3.87996000  | 3.33465400  |
| H | -0.55498800 | 2.67460400  | 4.96675000  |
| H | -0.57594700 | 4.40225100  | 5.32060500  |
| C | 0.51986900  | 2.99446900  | 1.79245000  |
| H | 1.31689400  | 1.73660200  | 3.36014200  |
| H | 2.48903100  | 2.89063400  | 2.71076300  |
| C | -0.95288000 | 2.89482100  | 2.20997900  |
| H | -1.16077500 | 4.91102700  | 2.96720700  |

|   |             |             |             |    |             |             |             |
|---|-------------|-------------|-------------|----|-------------|-------------|-------------|
| H | -2.32678500 | 3.77036700  | 3.63119200  | C  | 1.75693800  | 0.33808400  | 0.30398700  |
| P | 0.86051100  | 2.00761600  | 0.21924300  | H  | 2.09916600  | 0.31235600  | 1.35045700  |
| H | 0.69230000  | 4.03249400  | 1.47304200  | C  | 2.77496500  | 0.97274700  | -0.54013000 |
| H | -1.14594100 | 1.87188300  | 2.54999700  | Cl | -0.21805200 | -0.39367000 | -2.29839100 |
| H | -1.61528000 | 3.08133100  | 1.35495500  | Cl | -0.13723700 | -0.41654900 | 2.50868800  |
| C | 2.72387800  | 1.95351600  | 0.09667000  | C  | 0.51583200  | -2.36177100 | 0.21803600  |
| C | 0.30213100  | 3.35251800  | -0.98136800 | P  | -1.11537000 | 1.80116100  | 0.14950000  |
| C | 3.25138600  | 1.79871900  | -1.33746000 | N  | -0.40664400 | -3.35187700 | 0.22383700  |
| C | 3.29608500  | 0.81513900  | 0.95539300  | N  | 1.70813800  | -2.93371800 | 0.50315300  |
| H | 3.08235500  | 2.91584000  | 0.49653300  | C  | 1.63563400  | -4.39427500 | 0.63019300  |
| C | 0.00212400  | 2.91891500  | -2.41864900 | H  | 2.13283500  | -4.72522700 | 1.54631700  |
| C | 1.18377900  | 4.61479500  | -0.99673200 | H  | 2.14145400  | -4.86832100 | -0.22097800 |
| H | -0.66475800 | 3.63765400  | -0.53452800 | C  | 0.13561100  | -4.64893900 | 0.64175700  |
| C | 4.78076000  | 1.84030500  | -1.35570800 | H  | -0.17609200 | -5.43445500 | -0.05368400 |
| H | 2.89374900  | 0.84675000  | -1.74993800 | H  | -0.23752500 | -4.90535500 | 1.64034800  |
| H | 2.86034700  | 2.58182700  | -1.99185600 | C  | 3.01552600  | -2.36855500 | 0.43385500  |
| C | 4.82410100  | 0.85151000  | 0.96160800  | C  | 3.64098800  | -2.25132700 | -0.82039400 |
| H | 2.96660100  | -0.14289900 | 0.52680300  | C  | 4.96583100  | -1.82027900 | -0.85911700 |
| H | 2.90819400  | 0.83925800  | 1.97653300  | H  | 5.45309100  | -1.71287100 | -1.82625500 |
| C | -0.68629900 | 4.04579500  | -3.19012600 | C  | 5.67668400  | -1.51564900 | 0.30400600  |
| H | 0.92922600  | 2.63620800  | -2.93149000 | C  | 5.02914300  | -1.65608800 | 1.53120200  |
| H | -0.61857800 | 2.02464800  | -2.41839100 | H  | 5.56947300  | -1.42803700 | 2.44823500  |
| C | 0.49458400  | 5.74748500  | -1.76239700 | C  | 3.70342500  | -2.08943300 | 1.62434500  |
| H | 2.13932100  | 4.39030400  | -1.48650800 | C  | 2.90026700  | -2.56702200 | -2.08667300 |
| H | 1.42990300  | 4.96007800  | 0.01327800  | H  | 3.55016600  | -2.43409300 | -2.95531200 |
| C | 5.38645500  | 0.76697300  | -0.45518000 | H  | 2.02476000  | -1.91910700 | -2.20924700 |
| H | 5.12026200  | 2.83256100  | -1.02196200 | H  | 2.53626000  | -3.60118400 | -2.09818800 |
| H | 5.13891900  | 1.71902200  | -2.38556700 | C  | 7.09772200  | -1.03244600 | 0.22487800  |
| H | 5.16253800  | 1.78307200  | 1.43986600  | H  | 7.14026700  | -0.02725200 | -0.21104600 |
| H | 5.21076600  | 0.02823500  | 1.57483000  | H  | 7.70673000  | -1.68682100 | -0.40791800 |
| C | 0.14351500  | 5.32703900  | -3.18751100 | H  | 7.56204000  | -0.98994400 | 1.21416900  |
| H | -1.66823500 | 4.24486300  | -2.73563800 | C  | 3.04436200  | -2.25051800 | 2.96391500  |
| H | -0.88145300 | 3.71969300  | -4.21922100 | H  | 2.06627500  | -1.75818600 | 2.99194800  |
| H | -0.42416300 | 6.03478900  | -1.23029300 | H  | 3.67188700  | -1.82760500 | 3.75322800  |
| H | 1.14110400  | 6.63406400  | -1.77131400 | H  | 2.88440300  | -3.30830900 | 3.20825000  |
| H | 5.14527900  | -0.22173500 | -0.86822800 | C  | -1.79228000 | -3.30014800 | -0.12297300 |
| H | 6.48060500  | 0.85054100  | -0.44112700 | C  | -2.14930400 | -3.51877600 | -1.46705800 |
| H | 1.07238300  | 5.15668100  | -3.75145900 | C  | -3.50539600 | -3.58390200 | -1.79004700 |
| H | -0.39076600 | 6.13511000  | -3.70246100 | H  | -3.78721600 | -3.74242400 | -2.82907900 |
|   |             |             |             | C  | -4.50197300 | -3.48547100 | -0.81798600 |
|   |             |             |             | C  | -4.11079200 | -3.32969200 | 0.51206800  |
|   |             |             |             | H  | -4.87092600 | -3.28989100 | 1.29046300  |
|   |             |             |             | C  | -2.76749400 | -3.24394700 | 0.88797900  |

***pseudo Z-2b-PC***

Ru 0.06890200 -0.34287600 0.09635400

|   |             |             |             |
|---|-------------|-------------|-------------|
| C | -1.11016500 | -3.72761400 | -2.52880200 |
| H | -0.55208000 | -2.80392100 | -2.71248300 |
| H | -1.57896100 | -4.04085300 | -3.46538600 |
| H | -0.38942300 | -4.50031600 | -2.23730900 |
| C | -5.95639400 | -3.54422100 | -1.19287600 |
| H | -6.35935100 | -2.53639000 | -1.35291100 |
| H | -6.55411400 | -4.01142500 | -0.40430800 |
| H | -6.10798300 | -4.10863200 | -2.11758500 |
| C | -2.40535000 | -3.16690700 | 2.34362100  |
| H | -3.24538900 | -2.77915200 | 2.92692500  |
| H | -1.54159700 | -2.52123700 | 2.52280600  |
| H | -2.17640900 | -4.16558300 | 2.73831700  |
| C | 2.74178700  | 1.05286400  | -1.94439100 |
| H | 1.89780100  | 0.62043300  | -2.47146900 |
| C | 3.76640500  | 1.68181100  | -2.64104400 |
| H | 3.72480200  | 1.73004600  | -3.72612000 |
| C | 4.83914100  | 2.26053100  | -1.95903600 |
| H | 5.63133100  | 2.76022100  | -2.51071600 |
| C | 4.88700000  | 2.19766400  | -0.56728500 |
| H | 5.71513800  | 2.64792100  | -0.02624500 |
| C | 3.87172000  | 1.55154800  | 0.12985900  |
| H | 3.91667600  | 1.48967200  | 1.21450100  |
| C | -0.88300700 | 2.87831500  | -1.36922500 |
| H | -0.74697200 | 2.11716500  | -2.15240700 |
| C | -2.05257200 | 3.78143800  | -1.78932300 |
| H | -2.98165600 | 3.21107700  | -1.88261100 |
| H | -2.22846000 | 4.55345100  | -1.02754600 |
| C | -1.75877700 | 4.45488900  | -3.13367700 |
| H | -1.69754900 | 3.68031600  | -3.91153800 |
| H | -2.59661800 | 5.10814100  | -3.40819200 |
| C | -0.45276200 | 5.24429200  | -3.10818900 |
| H | -0.24818600 | 5.67476100  | -4.09622100 |
| H | -0.55456200 | 6.09026200  | -2.41224600 |
| C | 0.70663100  | 4.36080200  | -2.65619300 |
| H | 1.63238500  | 4.94523800  | -2.58668400 |
| H | 0.88596700  | 3.57654000  | -3.40490400 |
| C | 0.40885800  | 3.70557600  | -1.30729700 |
| H | 0.30126900  | 4.49622600  | -0.55213800 |
| H | 1.25517800  | 3.08448600  | -1.00153700 |
| C | -0.85427600 | 2.81316100  | 1.69724300  |
| H | -1.21209600 | 2.11186000  | 2.46501800  |
| C | 0.61150000  | 3.08514300  | 2.05532700  |
| H | 1.17151500  | 2.14756800  | 2.02006000  |

|   |             |             |             |
|---|-------------|-------------|-------------|
| H | 1.06742300  | 3.76978600  | 1.33071000  |
| C | 0.71657300  | 3.69232600  | 3.45511000  |
| H | 0.36746100  | 2.95255700  | 4.18929600  |
| H | 1.76822300  | 3.89678700  | 3.69190600  |
| C | -0.11317900 | 4.96826000  | 3.58100700  |
| H | -0.05579500 | 5.36530000  | 4.60199500  |
| H | 0.30709600  | 5.74121900  | 2.92030800  |
| C | -1.56789800 | 4.71552700  | 3.19263900  |
| H | -2.14484900 | 5.64786400  | 3.23667800  |
| H | -2.02358400 | 4.02962800  | 3.92150600  |
| C | -1.68080200 | 4.10256900  | 1.79408400  |
| H | -1.31736100 | 4.83034100  | 1.05607800  |
| H | -2.73601500 | 3.91887900  | 1.56131400  |
| C | -2.96281200 | 1.51081700  | 0.17647900  |
| H | -3.40502400 | 2.50820200  | 0.03707500  |
| C | -3.42726800 | 0.62757100  | -0.98980800 |
| H | -3.00517000 | 0.96344700  | -1.94279500 |
| H | -3.05017400 | -0.39416600 | -0.84674800 |
| C | -4.95438700 | 0.60467300  | -1.06137500 |
| H | -5.32087000 | 1.61649500  | -1.29239800 |
| H | -5.27664800 | -0.03883800 | -1.88961300 |
| C | -5.57005200 | 0.12730300  | 0.25256800  |
| H | -6.66502700 | 0.18581400  | 0.20617900  |
| H | -5.31286700 | -0.92962800 | 0.39782200  |
| C | -5.04873300 | 0.92852900  | 1.44363400  |
| H | -5.44293100 | 0.51580500  | 2.38070100  |
| H | -5.42150800 | 1.96197000  | 1.37856300  |
| C | -3.51856800 | 0.95881800  | 1.49473200  |
| H | -3.12001200 | -0.04814100 | 1.67153800  |
| H | -3.20155400 | 1.56789000  | 2.34734600  |

**1a-Inact-C PPh<sub>3</sub>-Cl<sub>2</sub>Ru=CHPh**

|    |             |             |             |
|----|-------------|-------------|-------------|
| Ru | -0.87239900 | -0.63597700 | -0.86069300 |
| Cl | -0.77808700 | 0.56701100  | -2.82203900 |
| Cl | -0.81639300 | -2.79196500 | -0.05474000 |
| P  | 0.99321800  | 0.07347600  | 0.09303700  |
| C  | -1.95472700 | 0.30859900  | 0.25929400  |
| H  | -1.57653100 | 1.09181300  | 0.93022600  |
| C  | -3.40694600 | 0.17898400  | 0.24419200  |
| C  | -4.19202200 | 1.22460200  | 0.76654600  |
| C  | -5.57972800 | 1.15763300  | 0.73227100  |
| C  | -6.21036800 | 0.03832800  | 0.18805700  |
| C  | -5.44623100 | -1.01571600 | -0.31585000 |

|   |             |             |             |    |             |             |             |
|---|-------------|-------------|-------------|----|-------------|-------------|-------------|
| C | -4.05902600 | -0.95034100 | -0.28794800 | Cl | 0.97530900  | -1.36099800 | -2.47868300 |
| H | -7.29519100 | -0.01730000 | 0.16539100  | P  | -0.92223800 | 0.05282900  | 0.01088000  |
| H | -6.17154700 | 1.97594000  | 1.13297700  | C  | 2.14658200  | 0.44316800  | -0.03171700 |
| H | -3.69876600 | 2.09636800  | 1.19011800  | H  | 1.80879900  | 1.48420400  | -0.02962700 |
| H | -3.46919500 | -1.79184900 | -0.64449400 | C  | -1.16013400 | 0.93067600  | 1.64180000  |
| H | -5.93548200 | -1.89570400 | -0.72357000 | H  | -1.15734200 | 0.07576200  | 2.33440700  |
| C | 1.05423200  | 1.86631900  | 0.48141500  | C  | 0.00031400  | 1.82671500  | 2.09437500  |
| C | 1.61905900  | 2.33358100  | 1.67494500  | H  | 0.10716100  | 2.68813200  | 1.42149800  |
| C | 0.53300700  | 2.78594900  | -0.43916300 | H  | 0.93404700  | 1.25847900  | 2.05710300  |
| C | 1.67091800  | 3.70152500  | 1.93770100  | C  | -0.23067000 | 2.32944700  | 3.52091200  |
| H | 2.01589800  | 1.63278400  | 2.40298900  | H  | -0.20158900 | 1.47178500  | 4.20787200  |
| C | 0.59444600  | 4.15148400  | -0.17304500 | H  | 0.59432000  | 2.98987800  | 3.81362900  |
| H | 0.07765400  | 2.42933500  | -1.35978600 | C  | -1.56883200 | 3.04870200  | 3.66568300  |
| C | 1.16174000  | 4.61215100  | 1.01453000  | H  | -1.72258500 | 3.36542700  | 4.70413300  |
| H | 2.10825900  | 4.05241800  | 2.86832200  | H  | -1.55906700 | 3.96523300  | 3.05719700  |
| H | 0.19003900  | 4.85514300  | -0.89532100 | C  | -2.71847800 | 2.15508800  | 3.20844700  |
| H | 1.20163800  | 5.67801700  | 1.22216600  | H  | -2.79694700 | 1.28953100  | 3.88191900  |
| C | 1.46145300  | -0.73155000 | 1.67162300  | H  | -3.67343400 | 2.69071300  | 3.27390100  |
| C | 2.80596100  | -0.95052400 | 1.99419800  | C  | -2.50479600 | 1.65935700  | 1.77629000  |
| C | 0.46770100  | -1.08179900 | 2.59151500  | H  | -2.52598300 | 2.52333200  | 1.09827900  |
| C | 3.15007200  | -1.50467200 | 3.22569500  | H  | -3.33682200 | 1.00786900  | 1.48475700  |
| H | 3.58566600  | -0.69368100 | 1.28243500  | C  | -1.30899200 | 1.17892600  | -1.44090200 |
| C | 0.81561500  | -1.63022300 | 3.82279300  | H  | -0.87131100 | 0.61044000  | -2.27434000 |
| H | -0.57876000 | -0.94913800 | 2.33301700  | C  | -0.56155800 | 2.51782300  | -1.36052300 |
| C | 2.15599800  | -1.84222700 | 4.14208700  | H  | -0.94862500 | 3.10648900  | -0.51764200 |
| H | 4.19595700  | -1.67569500 | 3.46503800  | H  | 0.50321400  | 2.35112400  | -1.17508700 |
| H | 0.03599700  | -1.90676000 | 4.52680700  | C  | -0.72444800 | 3.32816700  | -2.64736300 |
| H | 2.42468000  | -2.27893900 | 5.10005100  | H  | -0.24818000 | 2.78452000  | -3.47515100 |
| C | 2.40760300  | -0.25684200 | -1.01581200 | H  | -0.19278200 | 4.28261100  | -2.55057700 |
| C | 2.61664800  | -1.58185900 | -1.42399500 | C  | -2.19522100 | 3.56397700  | -2.97336000 |
| C | 3.25117800  | 0.75428900  | -1.48267900 | H  | -2.29608100 | 4.11219300  | -3.91753000 |
| C | 3.66614900  | -1.88662600 | -2.28488100 | H  | -2.64482700 | 4.19650600  | -2.19364500 |
| H | 1.95828600  | -2.37174200 | -1.06741600 | C  | -2.94782300 | 2.23920700  | -3.04687800 |
| C | 4.29898300  | 0.44206200  | -2.34779300 | H  | -4.01328900 | 2.41131200  | -3.24221100 |
| H | 3.09141000  | 1.78400200  | -1.17662300 | H  | -2.56471300 | 1.65210500  | -3.89363600 |
| C | 4.50789600  | -0.87533100 | -2.74872300 | C  | -2.79382700 | 1.41745800  | -1.76273900 |
| H | 3.82253800  | -2.91482100 | -2.59849700 | H  | -3.32182900 | 0.46743800  | -1.89120800 |
| H | 4.95016600  | 1.23288100  | -2.70954300 | H  | -3.28449400 | 1.94623500  | -0.93548300 |
| H | 5.32304100  | -1.11480500 | -3.42594500 | C  | -2.32773100 | -1.18503900 | -0.01003100 |

**1b-Inact-C PCy<sub>3</sub>-Cl<sub>2</sub>Ru=CHPh**

|    |            |             |             |   |             |             |             |
|----|------------|-------------|-------------|---|-------------|-------------|-------------|
| Ru | 1.04901200 | -0.99291500 | -0.19608300 | H | -3.23364700 | -0.56946000 | -0.11588700 |
| Cl | 1.03868100 | -1.90036800 | 1.93500100  | C | -2.48916600 | -2.01357200 | 1.27178600  |
|    |            |             |             | H | -2.61323700 | -1.36366800 | 2.14474400  |
|    |            |             |             | H | -1.58226600 | -2.60302700 | 1.45080400  |

|   |             |             |             |   |             |             |             |
|---|-------------|-------------|-------------|---|-------------|-------------|-------------|
| C | -3.70367300 | -2.94014200 | 1.16771200  | H | -4.45248400 | -2.33234400 | 2.01005700  |
| H | -3.78098000 | -3.53958600 | 2.08269700  | H | -4.35413400 | -1.96941200 | -2.26113600 |
| H | -4.61995800 | -2.33309700 | 1.11426800  | C | 2.98322500  | -0.84431500 | -0.02041500 |
| C | -3.63050200 | -3.84497800 | -0.05878700 | C | 3.59081200  | -0.53955000 | 1.20921300  |
| H | -2.77836400 | -4.53137400 | 0.04703000  | C | 3.61922000  | -0.54553400 | -1.24114300 |
| H | -4.52980100 | -4.46900100 | -0.12601200 | C | 4.78257600  | 0.19044400  | 1.19102900  |
| C | -3.45477600 | -3.02168600 | -1.33173800 | C | 4.80924900  | 0.17850500  | -1.20413100 |
| H | -4.35599100 | -2.41290300 | -1.50023200 | C | 5.39290600  | 0.57972100  | 0.00037000  |
| H | -3.35284600 | -3.67740000 | -2.20452200 | H | 5.24568900  | 0.45329800  | 2.14013400  |
| C | -2.23452400 | -2.10676800 | -1.23506200 | H | 5.29544300  | 0.43297800  | -2.14366700 |
| H | -1.32835500 | -2.72184500 | -1.15723200 | C | -1.66585900 | -1.80136100 | -2.57213800 |
| H | -2.11590100 | -1.53077600 | -2.15923900 | H | -0.94131600 | -2.60484100 | -2.74541500 |
| C | 6.39284600  | 0.02768000  | -0.08810100 | H | -2.33989200 | -1.77113600 | -3.43182300 |
| C | 5.79259300  | 1.23396600  | -0.45084800 | H | -1.10372400 | -0.86063100 | -2.54470100 |
| C | 4.40972700  | 1.36239400  | -0.40623600 | C | -1.77448700 | -2.23555500 | 2.46056900  |
| C | 3.59702500  | 0.28247900  | -0.01115600 | H | -2.48244400 | -2.34380200 | 3.28608500  |
| C | 4.21961800  | -0.92329800 | 0.36682600  | H | -1.06273300 | -3.06692300 | 2.51861800  |
| C | 5.60304000  | -1.04587500 | 0.32559700  | H | -1.20361400 | -1.31251400 | 2.61500100  |
| H | 7.47425400  | -0.07218500 | -0.11764100 | C | 3.05907000  | -1.04562600 | 2.51998300  |
| H | 6.40484600  | 2.07476800  | -0.76479900 | H | 1.99083700  | -1.26035700 | 2.48427300  |
| H | 3.94155200  | 2.30218600  | -0.68954600 | H | 3.59513400  | -1.95939600 | 2.80922600  |
| H | 3.61340400  | -1.74863900 | 0.73310400  | H | 3.21031500  | -0.30702400 | 3.31080800  |
| H | 6.06930400  | -1.97949600 | 0.62701500  | C | 3.08171600  | -1.04988100 | -2.54930200 |

**2b-Inact-C NHC-Cl<sub>2</sub>Ru=CHPh**

|    |             |             |             |   |             |             |             |
|----|-------------|-------------|-------------|---|-------------|-------------|-------------|
| Ru | 0.25236400  | 0.85526700  | 0.07666000  | H | 2.01419300  | -0.84985300 | -2.65452700 |
| C  | 0.50310100  | -1.05695300 | -0.01085400 | H | 3.59541100  | -0.56944300 | -3.38567900 |
| N  | 1.75892900  | -1.58167800 | -0.04959500 | H | 3.24213900  | -2.13222400 | -2.64103600 |
| N  | -0.36190800 | -2.10145000 | -0.01757200 | C | -6.07639100 | -2.26045500 | -0.17628500 |
| C  | 1.77764500  | -3.03840200 | 0.05030100  | H | -6.40244400 | -3.29001300 | -0.36743100 |
| H  | 2.14304900  | -3.34431500 | 1.03940600  | H | -6.52377700 | -1.94580700 | 0.77088800  |
| H  | 2.43846800  | -3.46932700 | -0.70776200 | H | -6.48874900 | -1.63503000 | -0.97379200 |
| C  | 0.31055600  | -3.39560000 | -0.16508500 | C | 6.64474800  | 1.41134600  | 0.00802800  |
| H  | -0.07019300 | -4.10963200 | 0.57149200  | H | 7.21318300  | 1.27172100  | 0.93205700  |
| H  | 0.12103700  | -3.80571200 | -1.16543900 | H | 7.29523800  | 1.16326900  | -0.83614200 |
| Cl | 0.75554700  | 1.39670800  | -2.12523200 | H | 6.40017500  | 2.47754700  | -0.06999300 |
| Cl | 0.59786900  | 1.14502800  | 2.35184000  | C | -1.55871600 | 1.01157700  | 0.03021700  |
| C  | -1.78476700 | -2.08709200 | -0.06073700 | H | -2.23439700 | 0.15801900  | 0.10627600  |
| C  | -2.49452600 | -2.20864600 | 1.14268900  | C | -2.22875000 | 2.30428900  | 0.00059400  |
| C  | -2.43853300 | -2.00275500 | -1.30014200 | C | -1.56367400 | 3.50496300  | -0.31764400 |
| C  | -3.88949800 | -2.24831900 | 1.08251500  | C | -3.59792600 | 2.36212800  | 0.32687300  |
| C  | -3.83357600 | -2.04702200 | -1.30857900 | C | -2.24187700 | 4.71632300  | -0.29028800 |
| C  | -4.57584400 | -2.17607900 | -0.13162600 | H | -0.52015200 | 3.48045700  | -0.62256300 |
|    |             |             |             | C | -4.27258400 | 3.57659700  | 0.35748000  |
|    |             |             |             | H | -4.12172000 | 1.43869900  | 0.56296900  |

|   |             |            |             |
|---|-------------|------------|-------------|
| C | -3.59503400 | 4.75709700 | 0.05098400  |
| H | -1.71723700 | 5.63316400 | -0.54325900 |
| H | -5.32735100 | 3.60503000 | 0.61666400  |
| H | -4.12189200 | 5.70714700 | 0.07033100  |

**PPH<sub>3</sub>**

|   |             |             |             |
|---|-------------|-------------|-------------|
| C | 0.64843900  | 1.52229500  | -0.41805400 |
| C | -1.64445600 | -0.19829500 | -0.41623400 |
| C | 0.99316900  | -1.32382900 | -0.41778500 |
| C | 0.07450900  | 2.12446900  | 0.70740800  |
| C | 1.77767800  | 2.11735100  | -0.99772300 |
| C | -1.87830300 | -0.99693200 | 0.70885900  |
| C | -2.72565300 | 0.47973900  | -0.99681100 |
| C | 0.94896500  | -2.59943500 | -0.99755700 |
| C | 1.79990900  | -1.12519400 | 0.70853200  |
| C | 0.62417700  | 3.28756400  | 1.24547300  |
| H | -0.80731200 | 1.68433900  | 1.16477300  |
| C | 2.33480900  | 3.27070000  | -0.45218400 |
| H | 2.22224500  | 1.67171800  | -1.88501200 |
| C | -3.16062800 | -1.10500900 | 1.24612200  |
| H | -1.05578100 | -1.53911600 | 1.16705100  |
| C | -4.00308400 | 0.38319000  | -0.45193400 |
| H | -2.56322900 | 1.08706900  | -1.88469900 |
| C | 1.67315700  | -3.65584700 | -0.45167200 |
| H | 0.34221500  | -2.76385700 | -1.88543100 |
| C | 2.53615200  | -2.17985700 | 1.24694200  |
| H | 1.85556700  | -0.14144700 | 1.16627100  |
| C | 1.75661400  | 3.86080900  | 0.67103600  |
| H | 0.16551700  | 3.74469200  | 2.11828200  |
| H | 3.21348700  | 3.71546200  | -0.91133300 |
| C | -4.22426100 | -0.41298000 | 0.67131900  |
| H | -3.32640400 | -1.73145900 | 2.11859300  |
| H | -4.82839100 | 0.91995900  | -0.91178800 |
| C | 2.47178800  | -3.44729800 | 0.67208000  |
| H | 1.62311800  | -4.63925400 | -0.91114500 |
| H | 3.16022600  | -2.00888300 | 2.12009900  |
| H | 2.18326800  | 4.76694300  | 1.09215200  |
| H | -5.22237500 | -0.49856300 | 1.09188200  |
| H | 3.04620400  | -4.26777200 | 1.09316800  |
| P | -0.00174900 | -0.00056500 | -1.22731800 |

**PCy<sub>3</sub>**

|   |             |             |             |
|---|-------------|-------------|-------------|
| P | -0.23089200 | -0.07198700 | -1.03455000 |
| C | 0.76503000  | -1.48638700 | -0.30033500 |
| H | 0.04690800  | -2.31872600 | -0.37882600 |
| C | 1.22003700  | -1.41780300 | 1.16055400  |
| H | 0.38187000  | -1.16081100 | 1.81980400  |
| H | 1.96530900  | -0.61852300 | 1.27036400  |
| C | 1.85395700  | -2.73898400 | 1.60480000  |
| H | 2.18970600  | -2.66358500 | 2.64671300  |
| H | 1.09223300  | -3.53208600 | 1.57835900  |
| C | 3.01892900  | -3.12896700 | 0.69732600  |
| H | 3.43777900  | -4.09412000 | 1.00746100  |
| H | 3.82465800  | -2.38845100 | 0.80920300  |
| C | 2.58642000  | -3.18200200 | -0.76668300 |
| H | 3.44374600  | -3.41687400 | -1.40969600 |
| H | 1.86288200  | -3.99979100 | -0.90006700 |
| C | 1.94214600  | -1.86814800 | -1.21181700 |
| H | 1.59827100  | -1.94358200 | -2.25008300 |
| H | 2.70099500  | -1.07444400 | -1.19282800 |
| C | -1.81955600 | -0.13622900 | -0.03420700 |
| H | -1.59561000 | -0.06872000 | 1.04200100  |
| C | -2.56434700 | -1.45513900 | -0.28681400 |
| H | -1.96112500 | -2.30943200 | 0.04055000  |
| H | -2.71514300 | -1.57642600 | -1.36988200 |
| C | -3.91870400 | -1.49985400 | 0.42215900  |
| H | -4.42607700 | -2.44488300 | 0.19171500  |
| H | -3.75814300 | -1.48907500 | 1.51025100  |
| C | -4.79644300 | -0.31404900 | 0.03295700  |
| H | -5.04667700 | -0.38430100 | -1.03565700 |
| H | -5.74658000 | -0.34378600 | 0.58014700  |
| C | -4.07181300 | 1.00327400  | 0.29273600  |
| H | -3.91729700 | 1.12439500  | 1.37507700  |
| H | -4.68894800 | 1.85094100  | -0.03014500 |
| C | -2.71870300 | 1.04872600  | -0.41891600 |
| H | -2.22092600 | 2.00000700  | -0.19796600 |
| H | -2.88030600 | 1.02906800  | -1.50709300 |
| C | 0.53052100  | 1.55432000  | -0.47078000 |
| H | -0.08093300 | 2.28154300  | -1.03114500 |
| C | 0.47481200  | 1.97277900  | 1.00455100  |
| H | 1.08003200  | 1.29026800  | 1.61284300  |
| H | -0.54917300 | 1.90659300  | 1.38992400  |

|   |            |            |             |
|---|------------|------------|-------------|
| C | 1.00133600 | 3.39996800 | 1.18621100  |
| H | 0.33225600 | 4.10014700 | 0.66443300  |
| H | 0.97358100 | 3.67614800 | 2.24777300  |
| C | 2.41728100 | 3.55365300 | 0.63412700  |
| H | 2.75850900 | 4.59038000 | 0.74303100  |
| H | 3.10475300 | 2.93434100 | 1.22902800  |
| C | 2.49028700 | 3.11828500 | -0.82768500 |
| H | 3.52177700 | 3.18520500 | -1.19531500 |
| H | 1.89318900 | 3.80717100 | -1.44271900 |
| C | 1.95986500 | 1.69646000 | -1.01077300 |
| H | 1.99478800 | 1.41007700 | -2.06935500 |
| H | 2.62073800 | 1.00172900 | -0.47413200 |

## PBE

### 1a-PC

|    |             |             |             |
|----|-------------|-------------|-------------|
| Ru | 0.15396300  | -0.02643000 | 0.07471900  |
| Cl | 0.15276000  | 0.24283300  | -2.30079500 |
| Cl | 0.33943300  | -1.17241200 | 2.17099100  |
| P  | -2.20104000 | -0.58316900 | 0.04741800  |
| P  | 2.53758200  | -0.03940600 | -0.02621900 |
| C  | 0.07064100  | 1.71435700  | 0.71049800  |
| H  | 0.79896900  | 1.95904000  | 1.51300300  |
| C  | -2.27906200 | 5.19884900  | -0.15636500 |
| C  | -1.58337600 | 5.08197000  | 1.06124000  |
| C  | -0.82226400 | 3.93840700  | 1.32109300  |
| C  | -0.76830300 | 2.86576300  | 0.38675600  |
| C  | -1.47245600 | 3.00415200  | -0.83670200 |
| C  | -2.20831800 | 4.16412600  | -1.10489900 |
| H  | -2.86537900 | 6.09889500  | -0.36759200 |
| H  | -1.62544400 | 5.88968000  | 1.79885800  |
| H  | -0.25750400 | 3.85618900  | 2.25696000  |
| H  | -1.40171000 | 2.20393200  | -1.57684000 |
| H  | -2.73563300 | 4.25761400  | -2.05936400 |
| C  | 3.42442400  | 1.40192800  | -0.78175100 |
| C  | 4.82847400  | 1.51232000  | -0.67371900 |
| C  | 2.70348600  | 2.41304900  | -1.44706700 |
| C  | 5.49784300  | 2.61079200  | -1.23196000 |
| H  | 5.40004300  | 0.74417200  | -0.14339500 |
| C  | 3.37796100  | 3.51431400  | -1.99911500 |
| H  | 1.61854100  | 2.32759900  | -1.54742000 |
| C  | 4.77325500  | 3.61561700  | -1.89470700 |
| H  | 6.58632800  | 2.68436500  | -1.14173100 |

|   |             |             |             |
|---|-------------|-------------|-------------|
| H | 2.80534900  | 4.29362000  | -2.51169200 |
| H | 5.29625900  | 4.47591400  | -2.32453300 |
| C | 3.51593800  | -0.29064100 | 1.52827000  |
| C | 4.50363500  | -1.28661800 | 1.65547600  |
| C | 3.28779000  | 0.58640000  | 2.60888700  |
| C | 5.25021500  | -1.39913700 | 2.84049800  |
| H | 4.69241500  | -1.98105400 | 0.83188100  |
| C | 4.03571900  | 0.47564500  | 3.78793900  |
| H | 2.51538600  | 1.35727900  | 2.53450000  |
| C | 5.02020900  | -0.51918500 | 3.90793600  |
| H | 6.01361200  | -2.17931600 | 2.92451100  |
| H | 3.84177700  | 1.16137500  | 4.61860500  |
| H | 5.60112900  | -0.60952900 | 4.83114200  |
| C | 2.97537600  | -1.49902400 | -1.06729700 |
| C | 2.54587700  | -2.77175900 | -0.62862700 |
| C | 3.62340300  | -1.37708600 | -2.31096200 |
| C | 2.78344200  | -3.90591700 | -1.41782000 |
| H | 2.02566400  | -2.86976200 | 0.33118500  |
| C | 3.85383900  | -2.51632200 | -3.09851000 |
| H | 3.93863300  | -0.39347300 | -2.67007500 |
| C | 3.43784000  | -3.78094300 | -2.65464900 |
| H | 2.44845600  | -4.88774300 | -1.06846200 |
| H | 4.35502300  | -2.41080100 | -4.06587900 |
| H | 3.61581100  | -4.66609200 | -3.27339000 |
| C | -2.39511900 | -2.35564700 | -0.49123200 |
| C | -1.55349900 | -3.32556400 | 0.09701900  |
| C | -3.36023700 | -2.77097000 | -1.43175200 |
| C | -1.67457400 | -4.67769600 | -0.25504200 |
| H | -0.81591500 | -3.02091800 | 0.84705100  |
| C | -3.47338000 | -4.12579500 | -1.78401100 |
| H | -4.03168900 | -2.04148800 | -1.89190700 |
| C | -2.63038600 | -5.08305800 | -1.19993300 |
| H | -1.01714900 | -5.41624400 | 0.21513300  |
| H | -4.22787900 | -4.42968700 | -2.51674500 |
| H | -2.71987300 | -6.13820300 | -1.47718100 |
| C | -3.06062600 | -0.56645700 | 1.68959900  |
| C | -4.13301100 | -1.44124000 | 1.95962600  |
| C | -2.66788100 | 0.36378200  | 2.67076600  |
| C | -4.80557700 | -1.37865000 | 3.18949100  |
| H | -4.44143700 | -2.17696900 | 1.21039400  |
| C | -3.34676000 | 0.42964300  | 3.89693200  |
| H | -1.81860600 | 1.02410100  | 2.47798400  |
| C | -4.41564300 | -0.44119600 | 4.15966500  |

|   |             |             |             |
|---|-------------|-------------|-------------|
| H | -5.63336100 | -2.06647900 | 3.38949200  |
| H | -3.02863000 | 1.15441100  | 4.65289800  |
| H | -4.93862600 | -0.39531200 | 5.12022100  |
| C | -3.40178600 | 0.32577800  | -1.03416600 |
| C | -4.46909300 | 1.06647000  | -0.48395700 |
| C | -3.22685700 | 0.31945500  | -2.43796600 |
| C | -5.34637300 | 1.77796500  | -1.31740600 |
| H | -4.61950700 | 1.09134000  | 0.59857800  |
| C | -4.10826700 | 1.03071800  | -3.26540500 |
| H | -2.38919700 | -0.22665200 | -2.87897300 |
| C | -5.17135800 | 1.76159300  | -2.70942000 |
| H | -6.16907900 | 2.34642600  | -0.87196800 |
| H | -3.95897000 | 1.01258900  | -4.34976700 |
| H | -5.85857100 | 2.31443600  | -3.35796900 |

### 1b-PC

|    |             |             |             |
|----|-------------|-------------|-------------|
| Ru | -0.02859100 | -0.02455600 | 0.08375600  |
| Cl | -0.07043400 | -0.29297300 | -2.32993300 |
| Cl | -0.03203900 | 0.82109700  | 2.37512900  |
| P  | 2.34953700  | 0.46777600  | 0.03018200  |
| P  | -2.43589700 | 0.27274600  | -0.00671400 |
| C  | -0.00941200 | -1.74029400 | 0.77560600  |
| H  | -0.22267600 | -1.77419000 | 1.86743300  |
| C  | 3.27055400  | 0.16250500  | 1.64951400  |
| H  | 2.72906800  | 0.85539800  | 2.32379200  |
| C  | 4.76580500  | 0.54974500  | 1.64237000  |
| H  | 4.91549500  | 1.56270700  | 1.22913100  |
| H  | 5.32790400  | -0.14581200 | 0.99067700  |
| C  | 5.35098600  | 0.48126000  | 3.06797400  |
| H  | 6.42593000  | 0.73744100  | 3.04214200  |
| H  | 4.85790000  | 1.24896400  | 3.69635200  |
| C  | 5.14060800  | -0.90270500 | 3.70238800  |
| H  | 5.52952700  | -0.91236000 | 4.73662200  |
| H  | 5.72771600  | -1.65425100 | 3.13766200  |
| C  | 3.65519500  | -1.29971800 | 3.68134000  |
| H  | 3.52113400  | -2.31471700 | 4.09740000  |
| H  | 3.08076100  | -0.61205900 | 4.33211700  |
| C  | 3.07080300  | -1.24078900 | 2.25747500  |
| H  | 1.99530200  | -1.47514000 | 2.28658300  |
| H  | 3.55870700  | -2.01008800 | 1.63270000  |
| C  | 2.60055100  | 2.32437500  | -0.24633500 |
| H  | 3.67568100  | 2.43593600  | -0.49168200 |
| C  | 2.31810600  | 3.21498700  | 0.98255700  |

|   |             |             |             |
|---|-------------|-------------|-------------|
| H | 2.93106100  | 2.90143500  | 1.84472900  |
| H | 1.26648400  | 3.09586000  | 1.29925700  |
| C | 2.61758800  | 4.69259900  | 0.66248000  |
| H | 2.38792000  | 5.31499400  | 1.54610000  |
| H | 3.70282000  | 4.81116400  | 0.46914600  |
| C | 1.83103400  | 5.18802700  | -0.56131100 |
| H | 0.74991600  | 5.18566200  | -0.32010800 |
| H | 2.09783100  | 6.23479900  | -0.79415100 |
| C | 2.07861800  | 4.28733900  | -1.78235600 |
| H | 3.13522400  | 4.38729600  | -2.10232900 |
| H | 1.46128100  | 4.61464700  | -2.63878600 |
| C | 1.78552500  | 2.80984200  | -1.46585600 |
| H | 1.97511800  | 2.17892700  | -2.35117000 |
| H | 0.70691900  | 2.69040400  | -1.24668600 |
| C | 3.28990400  | -0.31278300 | -1.41697400 |
| H | 2.50626100  | -0.31383200 | -2.20183600 |
| C | 4.51810800  | 0.43492100  | -1.98467400 |
| H | 5.32950300  | 0.46931600  | -1.23349100 |
| H | 4.26905700  | 1.47970500  | -2.23592000 |
| C | 5.03662800  | -0.26754400 | -3.25718100 |
| H | 4.26075500  | -0.19653300 | -4.04440200 |
| H | 5.92459700  | 0.26798700  | -3.63974800 |
| C | 5.36605400  | -1.74794800 | -3.00739600 |
| H | 5.69066700  | -2.23192000 | -3.94620400 |
| H | 6.22037800  | -1.81899600 | -2.30483500 |
| C | 4.15833700  | -2.48663500 | -2.40915200 |
| H | 4.41849500  | -3.53623600 | -2.18112100 |
| H | 3.33879800  | -2.51695200 | -3.15330800 |
| C | 3.65178700  | -1.78758600 | -1.13432000 |
| H | 2.78324000  | -2.32945000 | -0.72610100 |
| H | 4.44811900  | -1.82970000 | -0.36718700 |
| C | -3.34822400 | -0.72121100 | -1.32616000 |
| H | -2.86172500 | -0.34148900 | -2.24680800 |
| C | -3.05729200 | -2.23611500 | -1.30031700 |
| H | -3.49336700 | -2.69893700 | -0.39673300 |
| H | -1.97151700 | -2.40355900 | -1.25873500 |
| C | -3.64682700 | -2.92054800 | -2.54811300 |
| H | -3.12433600 | -2.53741700 | -3.44650300 |
| H | -3.44554600 | -4.00629100 | -2.50575400 |
| C | -5.15621500 | -2.65830700 | -2.68321000 |
| H | -5.54890000 | -3.12074900 | -3.60683800 |
| H | -5.68742600 | -3.14163600 | -1.83887000 |
| C | -5.45953600 | -1.15145000 | -2.67084900 |



|   |             |             |             |
|---|-------------|-------------|-------------|
| H | -5.03021200 | -0.68420700 | -3.57903600 |
| H | -6.55002400 | -0.97515500 | -2.71150400 |
| C | -4.86711000 | -0.46243600 | -1.42516000 |
| H | -5.36686200 | -0.86328600 | -0.52292000 |
| H | -5.09310900 | 0.61795600  | -1.45864400 |
| C | -3.27355200 | 0.06193700  | 1.67662200  |
| H | -2.50549300 | 0.51553400  | 2.33609000  |
| C | -3.40252200 | -1.41825100 | 2.09691800  |
| H | -4.18101200 | -1.91334100 | 1.48556700  |
| H | -2.45846600 | -1.95841200 | 1.91266900  |
| C | -3.79506200 | -1.52790500 | 3.58214600  |
| H | -2.98199000 | -1.10118900 | 4.20062000  |
| H | -3.88850500 | -2.59160700 | 3.86765800  |
| C | -5.10654000 | -0.77887600 | 3.86823500  |
| H | -5.35345100 | -0.82806300 | 4.94414300  |
| H | -5.93626700 | -1.28086700 | 3.33136000  |
| C | -5.01880000 | 0.68509900  | 3.40772800  |
| H | -5.98422700 | 1.19941600  | 3.56650900  |
| H | -4.27045900 | 1.21679700  | 4.02718900  |
| C | -4.60906700 | 0.80004000  | 1.92434400  |
| H | -4.53080700 | 1.86771100  | 1.65887000  |
| H | -5.41026500 | 0.37188000  | 1.29324100  |
| C | -2.85851600 | 2.05612600  | -0.48436400 |
| H | -3.95364000 | 2.13447900  | -0.33086300 |
| C | -2.57744200 | 2.40233000  | -1.96261800 |
| H | -3.10305700 | 1.70504300  | -2.63631000 |
| H | -1.50068800 | 2.27955500  | -2.17959100 |
| C | -3.02081400 | 3.84344700  | -2.28158600 |
| H | -2.78567400 | 4.07686600  | -3.33576100 |
| H | -4.12259200 | 3.91522500  | -2.18309000 |
| C | -2.36281300 | 4.86751700  | -1.34412400 |
| H | -1.27111000 | 4.87867000  | -1.53117700 |
| H | -2.72967900 | 5.88588800  | -1.56638600 |
| C | -2.61827200 | 4.51424200  | 0.12982600  |
| H | -3.69951600 | 4.62216600  | 0.34939300  |
| H | -2.09285000 | 5.22315200  | 0.79532700  |
| C | -2.17575900 | 3.07547600  | 0.45401800  |
| H | -1.07848300 | 2.99253700  | 0.34261500  |
| H | -2.37695100 | 2.84003500  | 1.51298300  |
| C | 0.67618600  | -5.77437900 | -0.56358800 |
| C | 0.44534500  | -5.48138700 | 0.79082900  |
| C | 0.22435200  | -4.15741600 | 1.18944100  |
| C | 0.23673800  | -3.09048300 | 0.24909500  |

|   |            |             |             |
|---|------------|-------------|-------------|
| C | 0.47355500 | -3.40841900 | -1.11362100 |
| C | 0.68502200 | -4.73319900 | -1.51023400 |
| H | 0.84666500 | -6.80811900 | -0.88107200 |
| H | 0.43525300 | -6.28445800 | 1.53467600  |
| H | 0.04003800 | -3.92848600 | 2.24538600  |
| H | 0.47305500 | -2.59607600 | -1.84711400 |
| H | 0.86007700 | -4.95803400 | -2.56741800 |

### ***Pseudo E- 2b-PC***

|    |             |             |             |
|----|-------------|-------------|-------------|
| Ru | -0.03851600 | -0.30753100 | 0.09958900  |
| C  | -0.28571800 | -2.35154900 | 0.22530400  |
| N  | 0.72753000  | -3.27174400 | 0.26472300  |
| N  | -1.44279500 | -3.02067600 | 0.52399700  |
| C  | 0.28227900  | -4.60098500 | 0.74451300  |
| H  | 0.65919300  | -4.77470800 | 1.76903400  |
| H  | 0.67808700  | -5.39539200 | 0.09028300  |
| C  | -1.24306200 | -4.47812000 | 0.69634500  |
| H  | -1.73202000 | -4.82772600 | 1.61978900  |
| H  | -1.69114600 | -5.02272400 | -0.15662800 |
| Cl | 0.42169600  | -0.41548000 | -2.27702800 |
| Cl | 0.06765200  | -0.44342400 | 2.54075000  |
| C  | -2.80112700 | -2.57336700 | 0.38697000  |
| C  | -3.57319300 | -2.34068000 | 1.55031500  |
| C  | -3.38335500 | -2.53374300 | -0.90568200 |
| C  | -4.93268800 | -2.01290500 | 1.38700000  |
| C  | -4.74605900 | -2.21062600 | -1.01046600 |
| C  | -5.53694800 | -1.93772200 | 0.12062300  |
| H  | -5.53558900 | -1.81696300 | 2.28184300  |
| H  | -5.20021700 | -2.16553600 | -2.00737600 |
| C  | 2.11114600  | -3.14054200 | -0.11218700 |
| C  | 3.10403800  | -2.95027500 | 0.88019600  |
| C  | 2.46559200  | -3.42136700 | -1.45837200 |
| C  | 4.45436300  | -2.96259500 | 0.47795200  |
| C  | 3.82758900  | -3.41912500 | -1.80376700 |
| C  | 4.83904100  | -3.18489100 | -0.85439600 |
| H  | 5.22760300  | -2.81111100 | 1.24080700  |
| H  | 4.10459000  | -3.62963000 | -2.84360100 |
| C  | -2.56750300 | -2.82685100 | -2.14020000 |
| H  | -2.12756900 | -3.83962100 | -2.11058800 |
| H  | -3.19380400 | -2.76203800 | -3.04342900 |
| H  | -1.72644200 | -2.11991200 | -2.24911000 |
| C  | -2.97240600 | -2.44808300 | 2.93061700  |

|   |             |             |             |   |             |             |             |
|---|-------------|-------------|-------------|---|-------------|-------------|-------------|
| H | -3.66473400 | -2.04617700 | 3.68727700  | C | -0.93075700 | 2.92454500  | 2.22921900  |
| H | -2.76993400 | -3.50080800 | 3.20288300  | H | -1.12666900 | 4.95434400  | 2.99738700  |
| H | -2.01528600 | -1.90292700 | 2.99922300  | H | -2.30760100 | 3.81051300  | 3.66379500  |
| C | 2.75846500  | -2.79837200 | 2.34162600  | P | 0.88636000  | 2.00503400  | 0.21971300  |
| H | 1.87047000  | -2.16449300 | 2.49905200  | H | 0.73689400  | 4.05329100  | 1.48106000  |
| H | 2.55416300  | -3.78331700 | 2.80199300  | H | -1.13618700 | 1.89409400  | 2.56627700  |
| H | 3.60295300  | -2.35700700 | 2.89477000  | H | -1.59574100 | 3.12168900  | 1.36835000  |
| C | 1.42264800  | -3.75201700 | -2.49628200 | C | 2.76945400  | 1.93767300  | 0.09235500  |
| H | 0.80022000  | -2.86755100 | -2.71566200 | C | 0.33551700  | 3.37817400  | -0.99028200 |
| H | 1.89988700  | -4.08380400 | -3.43158600 | C | 3.29545100  | 1.77408600  | -1.35222200 |
| H | 0.74677300  | -4.55651700 | -2.15617500 | C | 3.34760700  | 0.79956900  | 0.96503600  |
| C | -6.99100900 | -1.55492700 | -0.03046100 | H | 3.12989900  | 2.91028000  | 0.48838700  |
| H | -7.49980100 | -2.18657000 | -0.77799000 | C | 0.02210100  | 2.94990800  | -2.43662700 |
| H | -7.53538400 | -1.64643800 | 0.92312300  | C | 1.23472700  | 4.64040300  | -1.00340000 |
| H | -7.08604800 | -0.50798800 | -0.37157600 | H | -0.63359400 | 3.67033800  | -0.53260700 |
| C | 6.29522200  | -3.17966100 | -1.26027300 | C | 4.83568200  | 1.81108000  | -1.37761200 |
| H | 6.95600200  | -3.36458200 | -0.39807900 | H | 2.93047600  | 0.81401300  | -1.76118700 |
| H | 6.50345900  | -3.94704500 | -2.02418100 | H | 2.90050500  | 2.56116200  | -2.01354200 |
| H | 6.58357200  | -2.20413700 | -1.69247800 | C | 4.88649000  | 0.83363600  | 0.96344200  |
| C | -1.79223000 | 0.25611900  | 0.25133600  | H | 3.01049400  | -0.16852400 | 0.54577700  |
| H | -2.17374100 | 0.23981800  | 1.29491800  | H | 2.96259100  | 0.83606300  | 1.99537100  |
| C | -2.80297400 | 0.81713500  | -0.65917700 | C | -0.66390600 | 4.09404300  | -3.20651200 |
| C | -2.76123800 | 0.75541600  | -2.07479900 | H | 0.95157800  | 2.66013600  | -2.95874300 |
| C | -3.92416700 | 1.44840100  | -0.05444300 | H | -0.61072500 | 2.05403000  | -2.43656500 |
| C | -3.79036800 | 1.30843600  | -2.84485800 | C | 0.54948000  | 5.79073700  | -1.76854800 |
| H | -1.91183900 | 0.25985700  | -2.55364500 | H | 2.19374200  | 4.40580600  | -1.50042500 |
| C | -4.94302100 | 2.01973200  | -0.82685300 | H | 1.48820000  | 4.98142000  | 0.01535500  |
| H | -3.98245600 | 1.48411600  | 1.03908000  | C | 5.44804300  | 0.73739100  | -0.46432700 |
| C | -4.88060500 | 1.94938700  | -2.22855000 | H | 5.18175400  | 2.81277100  | -1.05170600 |
| H | -3.74117700 | 1.24343400  | -3.93687900 | H | 5.19088400  | 1.67986700  | -2.41598300 |
| H | -5.78848100 | 2.51330300  | -0.33633400 | H | 5.23101500  | 1.77531700  | 1.43648800  |
| H | -5.67756600 | 2.38819600  | -2.83779500 | H | 5.27703900  | 0.00888000  | 1.58688900  |
| H | 1.38227300  | 4.79784700  | 3.81640600  | C | 0.18300900  | 5.37655000  | -3.20288800 |
| C | 1.15179800  | 3.76684400  | 4.15440700  | H | -1.64903100 | 4.30209400  | -2.74320800 |
| C | -0.32492800 | 3.69362500  | 4.57403900  | H | -0.86889800 | 3.77088900  | -4.24334100 |
| C | 1.47822600  | 2.77248800  | 3.02141900  | H | -0.37004200 | 6.08806800  | -1.22641900 |
| H | 1.80953600  | 3.56729700  | 5.01994100  | H | 1.21037800  | 6.67686400  | -1.77711700 |
| C | -1.24839800 | 3.91530600  | 3.36526700  | H | 5.20376400  | -0.26188100 | -0.87188600 |
| H | -0.52969400 | 2.69570400  | 5.00768100  | H | 6.55038700  | 0.82094500  | -0.45456300 |
| H | -0.53774900 | 4.43585400  | 5.36485700  | H | 1.11371500  | 5.19882000  | -3.77751400 |
| C | 0.55254300  | 3.01109100  | 1.80981000  | H | -0.35042100 | 6.19790000  | -3.71509400 |
| H | 1.34958900  | 1.73837100  | 3.38444400  |   |             |             |             |
| H | 2.53604800  | 2.89564000  | 2.73089200  |   |             |             |             |

**Pseudo Z- 2b-PC**

|    |             |             |             |   |             |             |             |
|----|-------------|-------------|-------------|---|-------------|-------------|-------------|
| Ru | 0.09376700  | -0.34108900 | 0.08879200  | C | -2.77707900 | -3.28150800 | 0.88492300  |
| C  | 1.79063900  | 0.36237000  | 0.30303200  | C | -1.06618700 | -3.74837900 | -2.53945400 |
| H  | 2.13965600  | 0.33001100  | 1.35752200  | H | -0.53336100 | -2.80123800 | -2.73261400 |
| C  | 2.79664200  | 1.02101300  | -0.54581700 | H | -1.51959700 | -4.09201100 | -3.48228600 |
| Cl | -0.20214900 | -0.37912000 | -2.31902900 | H | -0.31263700 | -4.49411900 | -2.23087600 |
| Cl | -0.11564700 | -0.41008400 | 2.51995500  | C | -5.95941500 | -3.66481300 | -1.24082200 |
| C  | 0.53924400  | -2.34761100 | 0.22259600  | H | -6.39448400 | -2.65761200 | -1.37784400 |
| P  | -1.14590400 | 1.79552000  | 0.15480900  | H | -6.55548600 | -4.17188100 | -0.46424100 |
| N  | -0.39001300 | -3.35452800 | 0.24045600  | H | -6.09120500 | -4.21140400 | -2.18850200 |
| N  | 1.74504600  | -2.91924500 | 0.53203900  | C | -2.43121500 | -3.16989600 | 2.35028800  |
| C  | 1.67111500  | -4.39263500 | 0.66993500  | H | -3.30841500 | -2.84010200 | 2.92961400  |
| H  | 2.18571800  | -4.72049300 | 1.58754100  | H | -1.60959100 | -2.45781500 | 2.53188300  |
| H  | 2.16792100  | -4.87544000 | -0.19338400 | H | -2.12665400 | -4.15063600 | 2.76164000  |
| C  | 0.16263500  | -4.64764400 | 0.70404300  | C | 2.76315800  | 1.10852100  | -1.96115400 |
| H  | -0.15860400 | -5.46239300 | 0.03401800  | H | 1.91863800  | 0.66228500  | -2.49331700 |
| H  | -0.20336700 | -4.87004100 | 1.72303200  | C | 3.78506800  | 1.75976100  | -2.66062900 |
| C  | 3.06324800  | -2.35770000 | 0.44293000  | H | 3.74134900  | 1.81085000  | -3.75368300 |
| C  | 3.68410600  | -2.25361600 | -0.82789500 | C | 4.85800900  | 2.35655200  | -1.97342100 |
| C  | 5.02318300  | -1.83359100 | -0.87889400 | H | 5.64832800  | 2.87342200  | -2.52770000 |
| H  | 5.50724400  | -1.73949500 | -1.85821800 | C | 4.90735400  | 2.28731300  | -0.57134500 |
| C  | 5.75306700  | -1.52586500 | 0.28417600  | H | 5.73534500  | 2.75050000  | -0.02454400 |
| C  | 5.10901900  | -1.65376900 | 1.52651700  | C | 3.89614500  | 1.61908000  | 0.12962700  |
| H  | 5.66343100  | -1.42299000 | 2.44422800  | H | 3.94358000  | 1.55200000  | 1.22207000  |
| C  | 3.77030000  | -2.07603700 | 1.63585600  | C | -0.94562700 | 2.88842800  | -1.38397900 |
| C  | 2.92895900  | -2.57136100 | -2.09437400 | H | -0.81216600 | 2.11788200  | -2.17051400 |
| H  | 3.58176000  | -2.45986600 | -2.97383100 | C | -2.13755500 | 3.78427200  | -1.79425900 |
| H  | 2.05743400  | -1.90535100 | -2.22233100 | H | -3.06928900 | 3.20069600  | -1.87544500 |
| H  | 2.54023300  | -3.60526100 | -2.09457100 | H | -2.31287300 | 4.56232600  | -1.02675700 |
| C  | 7.18478300  | -1.05120800 | 0.19045300  | C | -1.86508900 | 4.46412400  | -3.15256600 |
| H  | 7.23164000  | -0.02894500 | -0.22642200 | H | -1.80387500 | 3.68382600  | -3.93632800 |
| H  | 7.78257700  | -1.69903000 | -0.47314700 | H | -2.72005800 | 5.11205800  | -3.41950500 |
| H  | 7.67104300  | -1.03386100 | 1.17893400  | C | -0.55859100 | 5.27305600  | -3.14246900 |
| C  | 3.11804300  | -2.22189800 | 2.98929600  | H | -0.36883200 | 5.70963700  | -4.13981100 |
| H  | 2.13560700  | -1.71944200 | 3.02174400  | H | -0.66289600 | 6.12392700  | -2.43983700 |
| H  | 3.75977200  | -1.79594700 | 3.77667900  | C | 0.62404600  | 4.39713000  | -2.70088100 |
| H  | 2.94724200  | -3.28366200 | 3.24686100  | H | 1.55070900  | 4.99635500  | -2.64073300 |
| C  | -1.78170700 | -3.32465000 | -0.12435100 | H | 0.80556200  | 3.61047600  | -3.45858200 |
| C  | -2.12386100 | -3.55938700 | -1.48164000 | C | 0.34949800  | 3.73050300  | -1.34012200 |
| C  | -3.48586600 | -3.65489500 | -1.81883000 | H | 0.24788700  | 4.52314800  | -0.57431500 |
| H  | -3.75553400 | -3.82618000 | -2.86764500 | H | 1.21094600  | 3.10975600  | -1.04805600 |
| C  | -4.50202000 | -3.57452900 | -0.85092200 | C | -0.88475900 | 2.82722400  | 1.71400000  |
| C  | -4.12347200 | -3.40250700 | 0.49204500  | H | -1.23440000 | 2.11661500  | 2.48915600  |
| H  | -4.89784100 | -3.37614900 | 1.26843700  | C | 0.58980900  | 3.11813900  | 2.06451300  |

|   |             |             |             |
|---|-------------|-------------|-------------|
| H | 1.16661800  | 2.18106400  | 2.02544300  |
| H | 1.03416200  | 3.81276300  | 1.32978800  |
| C | 0.69834600  | 3.73345000  | 3.47231300  |
| H | 0.36202300  | 2.98463700  | 4.21562300  |
| H | 1.75713500  | 3.95222000  | 3.70225000  |
| C | -0.15219400 | 5.00762000  | 3.60532300  |
| H | -0.09386100 | 5.40765900  | 4.63384200  |
| H | 0.25843900  | 5.79211300  | 2.93838700  |
| C | -1.61579900 | 4.73714900  | 3.22083200  |
| H | -2.20743200 | 5.66989900  | 3.26584300  |
| H | -2.06472600 | 4.04248800  | 3.95799200  |
| C | -1.73049300 | 4.11628200  | 1.81371600  |
| H | -1.37464100 | 4.85194200  | 1.06773800  |
| H | -2.79279000 | 3.92120300  | 1.58409700  |
| C | -3.00851700 | 1.47489000  | 0.19822600  |
| H | -3.46263800 | 2.47614600  | 0.05742500  |
| C | -3.47277900 | 0.57981200  | -0.97251300 |
| H | -3.05696500 | 0.92319000  | -1.93483400 |
| H | -3.07935000 | -0.44411400 | -0.82910000 |
| C | -5.01070300 | 0.53836600  | -1.03627800 |
| H | -5.39264900 | 1.55242000  | -1.27168700 |
| H | -5.33170600 | -0.11673200 | -1.86682400 |
| C | -5.61957400 | 0.05689300  | 0.29155000  |
| H | -6.72340500 | 0.10415300  | 0.24965300  |
| H | -5.34920600 | -1.00491400 | 0.44014900  |
| C | -5.09734400 | 0.87353400  | 1.48540000  |
| H | -5.48564300 | 0.45834100  | 2.43335200  |
| H | -5.48386700 | 1.91051300  | 1.41667200  |
| C | -3.55629400 | 0.92053500  | 1.53045100  |
| H | -3.14424800 | -0.08855200 | 1.71258000  |
| H | -3.23921100 | 1.54205300  | 2.38454600  |

**1a-Inact-C PPh<sub>3</sub>Cl<sub>2</sub>Ru=CHPh**

|    |             |             |             |
|----|-------------|-------------|-------------|
| Ru | -0.86535500 | -0.91279100 | -0.55538900 |
| Cl | -0.82120000 | -0.54910500 | -2.83520300 |
| Cl | -0.81361900 | -2.64945500 | 0.96673000  |
| P  | 0.99484100  | 0.09978600  | 0.05718100  |
| C  | -1.97969000 | 0.37717900  | 0.15478700  |
| H  | -1.59678800 | 1.34865700  | 0.52193100  |
| C  | -3.43448500 | 0.25232400  | 0.17119500  |
| C  | -4.22426300 | 1.41414000  | 0.38300200  |
| C  | -5.62205000 | 1.34391000  | 0.37533200  |
| C  | -6.26354100 | 0.11116700  | 0.16570100  |

|   |             |             |             |
|---|-------------|-------------|-------------|
| C | -5.49722300 | -1.05266800 | -0.03024700 |
| C | -4.10107900 | -0.98641200 | -0.02573300 |
| H | -7.35648800 | 0.05467100  | 0.16345200  |
| H | -6.21376000 | 2.25067400  | 0.53575400  |
| H | -3.72295400 | 2.37467000  | 0.54549600  |
| H | -3.51085100 | -1.90247400 | -0.14039500 |
| H | -5.99380500 | -2.01659300 | -0.17785200 |
| C | 1.05235700  | 1.92776400  | -0.24227700 |
| C | 1.60921200  | 2.81368200  | 0.70506000  |
| C | 0.53177000  | 2.44129400  | -1.44997000 |
| C | 1.65583400  | 4.19153700  | 0.43901600  |
| H | 2.00387000  | 2.43273100  | 1.65084300  |
| C | 0.58952500  | 3.81807200  | -1.71147600 |
| H | 0.07793000  | 1.76132900  | -2.17896300 |
| C | 1.15043500  | 4.69585700  | -0.76913700 |
| H | 2.08650400  | 4.87023400  | 1.18199300  |
| H | 0.18608600  | 4.20416300  | -2.65275600 |
| H | 1.18709600  | 5.77065200  | -0.97305700 |
| C | 1.48723800  | -0.05942000 | 1.83541900  |
| C | 2.84494300  | -0.13617200 | 2.20932700  |
| C | 0.49307400  | -0.05028400 | 2.83461100  |
| C | 3.20097500  | -0.19097600 | 3.56633400  |
| H | 3.62562000  | -0.15695400 | 1.44283400  |
| C | 0.85375400  | -0.10029300 | 4.18875600  |
| H | -0.56299400 | -0.02812300 | 2.54877900  |
| C | 2.20719200  | -0.16941500 | 4.55742600  |
| H | 4.25721800  | -0.25454600 | 3.84624100  |
| H | 0.07359500  | -0.10061000 | 4.95611800  |
| H | 2.48606500  | -0.21670400 | 5.61477800  |
| C | 2.42529700  | -0.61373200 | -0.86413400 |
| C | 2.64560300  | -2.00494600 | -0.75502400 |
| C | 3.26335100  | 0.16283800  | -1.68723800 |
| C | 3.70017200  | -2.60488300 | -1.45604500 |
| H | 1.99086400  | -2.61607200 | -0.12369300 |
| C | 4.31658500  | -0.44597100 | -2.38861600 |
| H | 3.09628400  | 1.23984800  | -1.78207800 |
| C | 4.53632400  | -1.82718100 | -2.27524700 |
| H | 3.86480500  | -3.68302400 | -1.36657200 |
| H | 4.96360800  | 0.16359400  | -3.02711600 |
| H | 5.35516200  | -2.29905200 | -2.82721300 |

**1b-Inact-C PCy<sub>3</sub>Cl<sub>2</sub>Ru=CHPh**

|    |             |             |             |                                            |             |             |             |
|----|-------------|-------------|-------------|--------------------------------------------|-------------|-------------|-------------|
| Ru | 1.02652700  | -1.02680700 | -0.11618400 | H                                          | -2.55588300 | -1.32803400 | 2.22967200  |
| Cl | 1.04967900  | -1.83011200 | 2.06148300  | H                                          | -1.60103200 | -2.61094800 | 1.47962700  |
| Cl | 0.95134100  | -1.61397500 | -2.35815100 | C                                          | -3.75869400 | -2.87530000 | 1.30019000  |
| P  | -0.91742400 | 0.06324100  | 0.01897300  | H                                          | -3.81382800 | -3.47565200 | 2.22593400  |
| C  | 2.17960900  | 0.40754100  | -0.06441100 | H                                          | -4.66164600 | -2.23225800 | 1.28873600  |
| H  | 1.84486400  | 1.45873200  | -0.08618400 | C                                          | -3.77479300 | -3.78826500 | 0.06442700  |
| C  | -1.15903800 | 1.03626600  | 1.62268300  | H                                          | -2.93964600 | -4.51225600 | 0.13473700  |
| H  | -1.16027000 | 0.20863700  | 2.36052100  | H                                          | -4.70586700 | -4.38241900 | 0.03747900  |
| C  | 0.01534400  | 1.95431300  | 2.02608400  | C                                          | -3.62236300 | -2.96830300 | -1.22625000 |
| H  | 0.11405600  | 2.79042000  | 1.30762600  | H                                          | -4.51556900 | -2.32520500 | -1.36044400 |
| H  | 0.95680500  | 1.38256700  | 2.00107400  | H                                          | -3.57959500 | -3.63399800 | -2.10676600 |
| C  | -0.20184700 | 2.52564300  | 3.44050700  | C                                          | -2.36017000 | -2.08830200 | -1.18602100 |
| H  | -0.16742100 | 1.69329900  | 4.17024700  | H                                          | -1.46399800 | -2.73413300 | -1.14616200 |
| H  | 0.63372600  | 3.20104400  | 3.69751100  | H                                          | -2.26623800 | -1.51415700 | -2.12345500 |
| C  | -1.54605500 | 3.25939500  | 3.56738000  | C                                          | 6.45540400  | 0.00719000  | -0.11507500 |
| H  | -1.69349500 | 3.61816200  | 4.60173000  | C                                          | 5.84925400  | 1.25442000  | -0.34225200 |
| H  | -1.53613500 | 4.15965300  | 2.92093700  | C                                          | 4.45499800  | 1.37174200  | -0.31103400 |
| C  | -2.71140200 | 2.35005800  | 3.14755500  | C                                          | 3.63136700  | 0.24189400  | -0.05901400 |
| H  | -2.79441300 | 1.50735500  | 3.86170300  | C                                          | 4.26450900  | -1.00776600 | 0.18024600  |
| H  | -3.66973500 | 2.89829000  | 3.19380700  | C                                          | 5.65713300  | -1.12090200 | 0.14946300  |
| C  | -2.50609000 | 1.78591800  | 1.72735700  | H                                          | 7.54566400  | -0.08535000 | -0.13619400 |
| H  | -2.51940200 | 2.62370600  | 1.00478200  | H                                          | 6.46585000  | 2.13658900  | -0.54158000 |
| H  | -3.35109500 | 1.12514600  | 1.46612500  | H                                          | 3.98268400  | 2.34422500  | -0.48886400 |
| C  | -1.29142900 | 1.13584200  | -1.50608700 | H                                          | 3.65457800  | -1.88613300 | 0.41968500  |
| H  | -0.89728300 | 0.48624300  | -2.31296200 | H                                          | 6.12650600  | -2.09087100 | 0.34014000  |
| C  | -0.47806000 | 2.44985000  | -1.53712000 | <b>2b-Inact-C NHCCl<sub>2</sub>Ru=CHPh</b> |             |             |             |
| H  | -0.83056300 | 3.12258200  | -0.73167300 | Ru                                         | 0.25204600  | 0.87031800  | 0.06608700  |
| H  | 0.58939900  | 2.25038700  | -1.35125600 | C                                          | 0.51170300  | -1.03385000 | -0.00345600 |
| C  | -0.62801600 | 3.16990500  | -2.89111400 | N                                          | 1.78464000  | -1.57453400 | -0.06643900 |
| H  | -0.18427400 | 2.53760000  | -3.68431400 | N                                          | -0.36159600 | -2.09877000 | 0.03959800  |
| H  | -0.04854700 | 4.11063800  | -2.87603100 | C                                          | 1.79146400  | -3.03418200 | 0.13110400  |
| C  | -2.10132400 | 3.44868300  | -3.22285500 | H                                          | 2.11266400  | -3.28108500 | 1.16171400  |
| H  | -2.19105100 | 3.92270700  | -4.21657400 | H                                          | 2.48694900  | -3.51858700 | -0.57377000 |
| H  | -2.51125200 | 4.17237400  | -2.49035500 | C                                          | 0.32501200  | -3.39809000 | -0.12329900 |
| C  | -2.92437200 | 2.15292100  | -3.17161100 | H                                          | -0.07140300 | -4.13400100 | 0.59524700  |
| H  | -3.99234900 | 2.36272000  | -3.36265600 | H                                          | 0.16185700  | -3.79019000 | -1.14588200 |
| H  | -2.58691400 | 1.47348500  | -3.97853500 | Cl                                         | 0.77094700  | 1.46099100  | -2.12105000 |
| C  | -2.78026400 | 1.42996600  | -1.81602900 | Cl                                         | 0.62671200  | 1.25730600  | 2.32422600  |
| H  | -3.37183200 | 0.50041100  | -1.84690100 | C                                          | -1.79375200 | -2.09924700 | -0.01843300 |
| H  | -3.21735700 | 2.06304300  | -1.02217100 | C                                          | -2.51790800 | -2.20380200 | 1.19217800  |
| C  | -2.37024800 | -1.15678400 | 0.04718600  | C                                          | -2.44569500 | -2.06091500 | -1.27473800 |
| H  | -3.26606100 | -0.50610000 | -0.02099300 | C                                          | -3.92130100 | -2.27236800 | 1.12124600  |
| C  | -2.50088100 | -1.98461200 | 1.34460500  |                                            |             |             |             |

|   |             |             |             |
|---|-------------|-------------|-------------|
| C | -3.85017100 | -2.13349700 | -1.29041200 |
| C | -4.60563200 | -2.24640900 | -0.10794600 |
| H | -4.49382800 | -2.34288600 | 2.05367300  |
| H | -4.36814100 | -2.09255400 | -2.25603200 |
| C | 3.02439900  | -0.84374000 | -0.03695100 |
| C | 3.63661400  | -0.52447300 | 1.20064900  |
| C | 3.67936600  | -0.57892600 | -1.26863100 |
| C | 4.85060500  | 0.18779800  | 1.17431300  |
| C | 4.89505400  | 0.12352400  | -1.23611100 |
| C | 5.48315800  | 0.54238300  | -0.02815300 |
| H | 5.31698300  | 0.46127800  | 2.12825500  |
| H | 5.39924400  | 0.34502000  | -2.18406700 |
| C | -1.66624300 | -1.88492300 | -2.55633800 |
| H | -0.97108600 | -2.72329400 | -2.73857000 |
| H | -2.34668600 | -1.82503500 | -3.41957300 |
| H | -1.05920300 | -0.96330100 | -2.53140500 |
| C | -1.80440700 | -2.19332400 | 2.52301400  |
| H | -2.52484700 | -2.25569700 | 3.35308000  |
| H | -1.10431500 | -3.04202600 | 2.61978200  |
| H | -1.20924800 | -1.27207100 | 2.64823000  |
| C | 3.08585300  | -0.99769100 | 2.52539300  |
| H | 1.99847600  | -1.15076800 | 2.50151700  |
| H | 3.57079200  | -1.94801900 | 2.81875400  |
| H | 3.29161500  | -0.26327400 | 3.31914900  |
| C | 3.11679400  | -1.06669700 | -2.58131300 |
| H | 2.17980100  | -0.54271500 | -2.83113200 |
| H | 3.83600000  | -0.89211800 | -3.39671300 |
| H | 2.89429500  | -2.14777900 | -2.55077700 |
| C | -6.11190800 | -2.36562900 | -0.16014900 |
| H | -6.41963300 | -3.42039300 | -0.27936500 |
| H | -6.57997700 | -1.99128400 | 0.76454900  |
| H | -6.53342000 | -1.80556300 | -1.01071700 |
| C | 6.76032500  | 1.35012600  | -0.02799900 |
| H | 7.32787200  | 1.21118400  | 0.90628600  |
| H | 7.41281300  | 1.07561000  | -0.87302200 |
| H | 6.54095500  | 2.42912000  | -0.12218300 |
| C | -1.58215600 | 1.03014000  | 0.01248500  |
| H | -2.24652600 | 0.15368000  | 0.02174200  |
| C | -2.27615000 | 2.31266300  | -0.00167600 |
| C | -1.60561700 | 3.56265300  | -0.09036000 |
| C | -3.69520200 | 2.31759400  | 0.08135900  |
| C | -2.32483800 | 4.76061200  | -0.08929300 |
| H | -0.51373000 | 3.59023400  | -0.17507900 |

|   |             |            |             |
|---|-------------|------------|-------------|
| C | -4.41202800 | 3.51928600 | 0.08317500  |
| H | -4.22287200 | 1.35962800 | 0.14773100  |
| C | -3.72933000 | 4.74477900 | -0.00149500 |
| H | -1.79181300 | 5.71362700 | -0.16090300 |
| H | -5.50460300 | 3.50292900 | 0.14898700  |
| H | -4.28857400 | 5.68562900 | -0.00238700 |

### PPh<sub>3</sub>

|   |             |             |             |
|---|-------------|-------------|-------------|
| C | -1.15798800 | -1.20096700 | -0.41544900 |
| C | 1.61910900  | -0.40355700 | -0.41531100 |
| C | -0.45940000 | 1.60318800  | -0.41430200 |
| C | -0.82980100 | -1.98611000 | 0.70901000  |
| C | -2.43711300 | -1.34942700 | -0.99615700 |
| C | 2.13103100  | 0.27089500  | 0.71205300  |
| C | 2.39047200  | -1.43348200 | -0.99780900 |
| C | 0.05060100  | 2.78546100  | -0.99521900 |
| C | -1.30392200 | 1.71087200  | 0.70977800  |
| C | -1.76247700 | -2.88947600 | 1.24427000  |
| H | 0.15961800  | -1.89327200 | 1.16769100  |
| C | -3.37299000 | -2.24051700 | -0.45191500 |
| H | -2.69900400 | -0.76115400 | -1.88300000 |
| C | 3.37983600  | -0.08302900 | 1.24816800  |
| H | 1.55196100  | 1.07803700  | 1.17131100  |
| C | 3.63041400  | -1.79664900 | -0.45274600 |
| H | 2.01445400  | -1.95265500 | -1.88675300 |
| C | -0.25484600 | 4.04134500  | -0.45159500 |
| H | 0.69123600  | 2.71849400  | -1.88194900 |
| C | -1.62154400 | 2.97013500  | 1.24445900  |
| H | -1.71720400 | 0.80705000  | 1.16825200  |
| C | -3.03646700 | -3.01634300 | 0.66960800  |
| H | -1.49095000 | -3.49367500 | 2.11614500  |
| H | -4.36163700 | -2.33826000 | -0.91182500 |
| C | 4.13054800  | -1.11897500 | 0.67126800  |
| H | 3.76460500  | 0.45254800  | 2.12228200  |
| H | 4.21223500  | -2.60102600 | -0.91419200 |
| C | -1.09553700 | 4.13721800  | 0.66952500  |
| H | 0.15375400  | 4.94669100  | -0.91189900 |
| H | -2.28092500 | 3.03682000  | 2.11608100  |
| H | -3.76159400 | -3.72097500 | 1.08876500  |
| H | 5.10358100  | -1.39306200 | 1.09092400  |
| H | -1.34469000 | 5.11743800  | 1.08799700  |

|                        |             |             |             |
|------------------------|-------------|-------------|-------------|
| P                      | 0.00033400  | -0.00043300 | -1.23104300 |
| <b>PCy<sub>3</sub></b> |             |             |             |
| P                      | -0.23295000 | -0.06929800 | -1.04538500 |
| C                      | 0.76007200  | -1.50489500 | -0.29514900 |
| H                      | 0.02286600  | -2.33281600 | -0.36207400 |
| C                      | 1.22992500  | -1.43246700 | 1.17163300  |
| H                      | 0.39399400  | -1.15982700 | 1.84097200  |
| H                      | 1.99010900  | -0.63452100 | 1.27094800  |
| C                      | 1.85833700  | -2.76666700 | 1.62289200  |
| H                      | 2.20561900  | -2.68734800 | 2.66941800  |
| H                      | 1.08153200  | -3.55695700 | 1.60817600  |
| C                      | 3.01863900  | -3.17988100 | 0.70224700  |
| H                      | 3.43083100  | -4.15553900 | 1.01744800  |
| H                      | 3.84101900  | -2.44397100 | 0.80478900  |
| C                      | 2.57239100  | -3.23598400 | -0.76845000 |
| H                      | 3.42860800  | -3.48508700 | -1.42153300 |
| H                      | 1.83413400  | -4.05319100 | -0.89296700 |
| C                      | 1.93258400  | -1.90964500 | -1.21994000 |
| H                      | 1.57748700  | -1.98800300 | -2.26285600 |
| H                      | 2.70494300  | -1.11707100 | -1.21168800 |
| C                      | -1.83947700 | -0.12898000 | -0.03289600 |
| H                      | -1.60926900 | -0.08216600 | 1.05179200  |
| C                      | -2.60129600 | -1.44543000 | -0.30941800 |
| H                      | -1.99995400 | -2.31757700 | 0.00186900  |
| H                      | -2.75563900 | -1.54593400 | -1.40245400 |
| C                      | -3.96497900 | -1.49289700 | 0.40452000  |
| H                      | -4.48396800 | -2.43628400 | 0.15480700  |
| H                      | -3.80217000 | -1.50470000 | 1.50064200  |
| C                      | -4.83882800 | -0.28408000 | 0.03704500  |
| H                      | -5.09449700 | -0.33372700 | -1.03994600 |
| H                      | -5.79511400 | -0.31520300 | 0.58988200  |
| C                      | -4.09742100 | 1.03133000  | 0.31920300  |
| H                      | -3.94036400 | 1.13409900  | 1.41147700  |
| H                      | -4.71177300 | 1.89626800  | 0.00902900  |
| C                      | -2.73398200 | 1.07904700  | -0.39636800 |
| H                      | -2.22441200 | 2.02858500  | -0.15557700 |
| H                      | -2.89735700 | 1.08213100  | -1.49282000 |
| C                      | 0.54723900  | 1.56771400  | -0.46980400 |
| H                      | -0.07525600 | 2.30235400  | -1.02485200 |
| C                      | 0.51037800  | 1.98502100  | 1.01716400  |
| H                      | 1.12502500  | 1.29289700  | 1.61998900  |
| H                      | -0.51640300 | 1.92092700  | 1.41827900  |

|   |            |            |             |
|---|------------|------------|-------------|
| C | 1.04931100 | 3.41932500 | 1.19891800  |
| H | 0.37181800 | 4.12927200 | 0.68372500  |
| H | 1.03463700 | 3.69396400 | 2.26961500  |
| C | 2.46854100 | 3.57055700 | 0.62629400  |
| H | 2.81787800 | 4.61324000 | 0.73517700  |
| H | 3.16558700 | 2.94238600 | 1.21606400  |
| C | 2.52417500 | 3.13560000 | -0.84739400 |
| H | 3.55945100 | 3.19842800 | -1.22932000 |
| H | 1.91989300 | 3.83523600 | -1.45815000 |
| C | 1.97918600 | 1.70799200 | -1.03249400 |
| H | 1.99779300 | 1.42531900 | -2.10090700 |
| H | 2.64844700 | 1.00031500 | -0.50619300 |

### BP86

#### 1a-PC

|    |             |             |             |
|----|-------------|-------------|-------------|
| Ru | 0.14976000  | -0.03908800 | 0.06643400  |
| Cl | 0.15039300  | 0.26268800  | -2.30820800 |
| Cl | 0.32513500  | -1.21704800 | 2.14947500  |
| P  | -2.21754200 | -0.57522600 | 0.04001300  |
| P  | 2.54329100  | -0.06011800 | -0.03119600 |
| C  | 0.08248000  | 1.70078800  | 0.71712400  |
| H  | 0.81391300  | 1.92984400  | 1.52243400  |
| C  | -2.19698400 | 5.24361600  | -0.12716400 |
| C  | -1.49062400 | 5.10972000  | 1.08442200  |
| C  | -0.75511900 | 3.94604800  | 1.33680800  |
| C  | -0.73715200 | 2.87043400  | 0.40130000  |
| C  | -1.45237900 | 3.02607100  | -0.81597400 |
| C  | -2.16264700 | 4.20560500  | -1.07667300 |
| H  | -2.76294100 | 6.15865600  | -0.33320200 |
| H  | -1.50401700 | 5.91916100  | 1.82229300  |
| H  | -0.18175500 | 3.85041700  | 2.26688800  |
| H  | -1.40923700 | 2.22469700  | -1.55799100 |
| H  | -2.69742700 | 4.31278700  | -2.02610600 |
| C  | 3.43537000  | 1.39981900  | -0.75372300 |
| C  | 4.83657500  | 1.52597200  | -0.60889800 |
| C  | 2.71997300  | 2.40836000  | -1.43267600 |
| C  | 5.50846700  | 2.63694000  | -1.14328100 |
| H  | 5.40339000  | 0.76014800  | -0.06920000 |
| C  | 3.39668900  | 3.52177400  | -1.96150000 |
| H  | 1.63840600  | 2.31090400  | -1.56203300 |
| C  | 4.78917000  | 3.63876600  | -1.81971000 |
| H  | 6.59406000  | 2.72212900  | -1.02411300 |

|   |             |             |             |
|---|-------------|-------------|-------------|
| H | 2.82832900  | 4.29801700  | -2.48473800 |
| H | 5.31356400  | 4.50824300  | -2.23085300 |
| C | 3.51370700  | -0.34009700 | 1.52806600  |
| C | 4.50528200  | -1.33637400 | 1.64202600  |
| C | 3.27495400  | 0.51366100  | 2.62721600  |
| C | 5.24412200  | -1.47271600 | 2.83150500  |
| H | 4.70351300  | -2.01229400 | 0.80469200  |
| C | 4.01519600  | 0.37974700  | 3.81076300  |
| H | 2.50046500  | 1.28429500  | 2.56364500  |
| C | 5.00288200  | -0.61589200 | 3.91728000  |
| H | 6.00989200  | -2.25272600 | 2.90427800  |
| H | 3.81257500  | 1.04742400  | 4.65492000  |
| H | 5.57723600  | -0.72454000 | 4.84349700  |
| C | 3.00143200  | -1.49853700 | -1.09863000 |
| C | 2.57432600  | -2.78489800 | -0.69341600 |
| C | 3.67511400  | -1.34759400 | -2.32730300 |
| C | 2.84139400  | -3.90321600 | -1.49881600 |
| H | 2.03415700  | -2.90654500 | 0.25313500  |
| C | 3.93439000  | -2.47064500 | -3.13210200 |
| H | 3.98917100  | -0.35422100 | -2.66123700 |
| C | 3.52225900  | -3.74894700 | -2.71987900 |
| H | 2.50960700  | -4.89531200 | -1.17453700 |
| H | 4.45588600  | -2.34173900 | -4.08664000 |
| H | 3.72357300  | -4.62156500 | -3.35045900 |
| C | -2.44330500 | -2.35236100 | -0.48619100 |
| C | -1.64295400 | -3.33872300 | 0.13575800  |
| C | -3.39740300 | -2.75464600 | -1.44603300 |
| C | -1.79572700 | -4.69360000 | -0.19997300 |
| H | -0.91228600 | -3.04341000 | 0.89716800  |
| C | -3.54125100 | -4.11227300 | -1.78300200 |
| H | -4.03748500 | -2.01341800 | -1.93244800 |
| C | -2.74100000 | -5.08599700 | -1.16334600 |
| H | -1.17153000 | -5.44412200 | 0.29723600  |
| H | -4.28650700 | -4.40487900 | -2.53073800 |
| H | -2.85506500 | -6.14297100 | -1.42724900 |
| C | -3.07988300 | -0.54000400 | 1.68484000  |
| C | -4.17518500 | -1.39038700 | 1.95121700  |
| C | -2.66439900 | 0.37548400  | 2.67270100  |
| C | -4.84732600 | -1.31786800 | 3.18259200  |
| H | -4.50160100 | -2.11469700 | 1.19767700  |
| C | -3.34227900 | 0.45140800  | 3.90092900  |
| H | -1.79882100 | 1.01638500  | 2.48396800  |
| C | -4.43383400 | -0.39478200 | 4.15932600  |

|   |             |             |             |
|---|-------------|-------------|-------------|
| H | -5.69275300 | -1.98632200 | 3.37850300  |
| H | -3.00593200 | 1.16429300  | 4.66130000  |
| H | -4.95603000 | -0.34107900 | 5.12074700  |
| C | -3.40933900 | 0.34236200  | -1.05053500 |
| C | -4.48290300 | 1.08270000  | -0.50778100 |
| C | -3.22481100 | 0.33655000  | -2.45489300 |
| C | -5.35822400 | 1.79151000  | -1.34856000 |
| H | -4.64028000 | 1.10864200  | 0.57421100  |
| C | -4.10421800 | 1.04481900  | -3.29000200 |
| H | -2.38148000 | -0.20650500 | -2.89026300 |
| C | -5.17469700 | 1.77337600  | -2.74112600 |
| H | -6.18563000 | 2.35887100  | -0.90867500 |
| H | -3.94733500 | 1.02630100  | -4.37400600 |
| H | -5.86011200 | 2.32346600  | -3.39513700 |

### 1b-PC

|    |             |             |             |
|----|-------------|-------------|-------------|
| Ru | -0.02662700 | -0.02698400 | 0.08318300  |
| Cl | -0.06602400 | -0.29360300 | -2.33420200 |
| Cl | -0.03025400 | 0.82414600  | 2.37698600  |
| P  | 2.35757900  | 0.46104000  | 0.03020900  |
| P  | -2.43880300 | 0.28059300  | -0.00569100 |
| C  | -0.00887200 | -1.74508200 | 0.77858800  |
| H  | -0.21047600 | -1.77725500 | 1.87330700  |
| C  | 3.28063800  | 0.15133600  | 1.65327900  |
| H  | 2.74200900  | 0.84567300  | 2.32943600  |
| C  | 4.78045400  | 0.53380000  | 1.64435200  |
| H  | 4.93295200  | 1.54850100  | 1.23442300  |
| H  | 5.33827200  | -0.16217000 | 0.98793500  |
| C  | 5.37174000  | 0.45828500  | 3.07075600  |
| H  | 6.44840500  | 0.71089700  | 3.04143500  |
| H  | 4.88342200  | 1.22612600  | 3.70403400  |
| C  | 5.15843600  | -0.93005900 | 3.70243500  |
| H  | 5.55028200  | -0.94423500 | 4.73652400  |
| H  | 5.74196100  | -1.68239900 | 3.13339100  |
| C  | 3.66834700  | -1.32239800 | 3.68432700  |
| H  | 3.53204700  | -2.33946600 | 4.09690300  |
| H  | 3.09818100  | -0.63485300 | 4.34019200  |
| C  | 3.07852500  | -1.25586700 | 2.25927300  |
| H  | 2.00166600  | -1.48785600 | 2.29058100  |
| H  | 3.56315400  | -2.02436600 | 1.62945100  |
| C  | 2.62008500  | 2.32005800  | -0.24473300 |
| H  | 3.69843100  | 2.42469600  | -0.48200900 |
| C  | 2.33313200  | 3.21434600  | 0.98433900  |



|   |             |             |             |   |             |             |             |
|---|-------------|-------------|-------------|---|-------------|-------------|-------------|
| H | 2.93318800  | 2.89327400  | 1.85376000  | H | -5.03298900 | -0.64212900 | -3.60316200 |
| H | 1.27596700  | 3.10579100  | 1.28890500  | H | -6.56076000 | -0.91915200 | -2.74195500 |
| C | 2.65277900  | 4.69213500  | 0.66786600  | C | -4.87589100 | -0.42666000 | -1.44455100 |
| H | 2.41817400  | 5.31727000  | 1.54940700  | H | -5.38395700 | -0.82535900 | -0.54501000 |
| H | 3.74247400  | 4.79911800  | 0.48854000  | H | -5.09096400 | 0.65678700  | -1.47621800 |
| C | 1.88581000  | 5.19782100  | -0.56840400 | C | -3.28060600 | 0.05966400  | 1.67940500  |
| H | 0.80111200  | 5.20996800  | -0.34040200 | H | -2.51751500 | 0.51964500  | 2.34149500  |
| H | 2.16981500  | 6.24157700  | -0.79880800 | C | -3.40044700 | -1.42448000 | 2.09970700  |
| C | 2.13485300  | 4.29101900  | -1.78863100 | H | -4.17134600 | -1.92606900 | 1.48250400  |
| H | 3.19695900  | 4.37553200  | -2.09754800 | H | -2.44982800 | -1.95659100 | 1.92134300  |
| H | 1.53078800  | 4.62639500  | -2.65227600 | C | -3.80236800 | -1.53868300 | 3.58570200  |
| C | 1.81738000  | 2.81496700  | -1.47238200 | H | -2.99579200 | -1.10649000 | 4.21012500  |
| H | 2.00455000  | 2.18077900  | -2.35670100 | H | -3.88984800 | -2.60430400 | 3.86947500  |
| H | 0.73513300  | 2.71028700  | -1.25868000 | C | -5.12399300 | -0.79848900 | 3.86573300  |
| C | 3.30041700  | -0.32153500 | -1.42049000 | H | -5.37606100 | -0.85026400 | 4.94129200  |
| H | 2.51980800  | -0.31379000 | -2.20929200 | H | -5.94776300 | -1.30685800 | 3.32394300  |
| C | 4.53912300  | 0.42345700  | -1.97805700 | C | -5.04492000 | 0.66955800  | 3.40545400  |
| H | 5.34604500  | 0.44865000  | -1.22060800 | H | -6.01635500 | 1.17636400  | 3.55822400  |
| H | 4.29752300  | 1.47189300  | -2.22441500 | H | -4.30418000 | 1.20778200  | 4.02981400  |
| C | 5.06480300  | -0.27580600 | -3.25334400 | C | -4.62668600 | 0.78703900  | 1.92120500  |
| H | 4.29443000  | -0.19829400 | -4.04644000 | H | -4.55760500 | 1.85546800  | 1.65322600  |
| H | 5.95826200  | 0.25894000  | -3.62685800 | H | -5.42053400 | 0.34894600  | 1.28620400  |
| C | 5.38803000  | -1.76138900 | -3.00661600 | C | -2.86168500 | 2.07134200  | -0.47101600 |
| H | 5.71756900  | -2.24342800 | -3.94582200 | H | -3.96030400 | 2.14202300  | -0.33395100 |
| H | 6.23776600  | -1.83846000 | -2.29778600 | C | -2.55755700 | 2.43149800  | -1.94464700 |
| C | 4.17024100  | -2.49919900 | -2.41939800 | H | -3.06404000 | 1.73352800  | -2.63335400 |
| H | 4.42535300  | -3.55128200 | -2.19330600 | H | -1.47493300 | 2.31973800  | -2.14210600 |
| H | 3.35657600  | -2.52331400 | -3.17113000 | C | -3.00874700 | 3.87400900  | -2.26268100 |
| C | 3.65371000  | -1.80265900 | -1.14297300 | H | -2.75527900 | 4.11753300  | -3.31126400 |
| H | 2.77765300  | -2.34316200 | -0.74640000 | H | -4.11367200 | 3.93481100  | -2.18482800 |
| H | 4.44280600  | -1.85274300 | -0.36757600 | C | -2.37761700 | 4.89955400  | -1.30311500 |
| C | -3.35689500 | -0.70052600 | -1.33813900 | H | -1.28193000 | 4.92377500  | -1.46920000 |
| H | -2.86142400 | -0.32118000 | -2.25496400 | H | -2.75167300 | 5.91654000  | -1.52439400 |
| C | -3.08224800 | -2.22173400 | -1.31557400 | C | -2.65618700 | 4.53086000  | 0.16608000  |
| H | -3.52889600 | -2.68148300 | -0.41443400 | H | -3.74329000 | 4.62382400  | 0.36704100  |
| H | -1.99785300 | -2.40241300 | -1.26881100 | H | -2.15096000 | 5.24108000  | 0.84686500  |
| C | -3.67438900 | -2.89885400 | -2.57041200 | C | -2.20053800 | 3.09157300  | 0.48666600  |
| H | -3.14371300 | -2.51893700 | -3.46624000 | H | -1.10023900 | 3.02116800  | 0.38951500  |
| H | -3.48469200 | -3.98750000 | -2.52918900 | H | -2.41531500 | 2.84628600  | 1.54141600  |
| C | -5.18346600 | -2.62068700 | -2.71224700 | C | 0.61813300  | -5.79038900 | -0.57233300 |
| H | -5.57641800 | -3.07684600 | -3.64001500 | C | 0.40035600  | -5.49659000 | 0.78582400  |
| H | -5.72425800 | -3.10121400 | -1.87127900 | C | 0.20019500  | -4.16891000 | 1.18881900  |
| C | -5.47147500 | -1.10750500 | -2.69744700 | C | 0.22008800  | -3.09912900 | 0.24893500  |

|   |            |             |             |   |            |             |            |
|---|------------|-------------|-------------|---|------------|-------------|------------|
| C | 0.44471500 | -3.41783700 | -1.11746500 | H | 2.38957847 | -3.42822628 | 3.41815120 |
| C | 0.63554800 | -4.74628200 | -1.51818000 | H | 3.68914367 | -2.35055455 | 2.86450647 |
| H | 0.77166800 | -6.82650000 | -0.89327400 | H | 1.99748973 | -1.80377663 | 2.76363847 |
| H | 0.38406300 | -6.30147600 | 1.52869800  | C | 2.29202523 | 3.02711178  | 2.17096211 |
| H | 0.02580700 | -3.93945700 | 2.24690600  | H | 1.75853145 | 2.07611905  | 2.33878666 |
| H | 0.44952200 | -2.60338400 | -1.84972400 | H | 3.32177801 | 2.90694947  | 2.55969622 |
| H | 0.80004600 | -4.97186300 | -2.57750800 | H | 1.81045876 | 3.80963461  | 2.78025115 |

**Pseudo E- 2b-PC**

|    |             |             |             |   |             |             |             |
|----|-------------|-------------|-------------|---|-------------|-------------|-------------|
| Ru | 0.00000000  | 0.00000000  | 0.00000000  | H | 3.07020589  | 1.93444818  | -2.76700118 |
| C  | 2.06652971  | 0.00000000  | 0.00000000  | H | 2.24961170  | 1.21694838  | -2.94492922 |
| N  | 2.86203986  | 1.11746009  | 0.00000000  | H | 3.27744374  | 2.47028795  | -3.70755242 |
| N  | 2.88861025  | -1.07330467 | 0.23381511  | H | 3.97083722  | 1.35048939  | -2.50337816 |
| C  | 4.26905160  | 0.82885869  | 0.38066516  | C | 2.15770994  | -6.77358703 | -0.32078452 |
| H  | 4.46825337  | 1.21608788  | 1.39707257  | H | 2.96590833  | -7.20631631 | -0.93739585 |
| H  | 4.96242045  | 1.32233815  | -0.32133310 | H | 2.16863173  | -7.28237450 | 0.65725715  |
| C  | 4.32437267  | -0.70221818 | 0.31615288  | H | 1.20257471  | -7.01856980 | -0.81967538 |
| H  | 4.78786534  | -1.15478537 | 1.20823192  | C | 2.06446273  | 6.68819945  | -1.32860691 |
| H  | 4.86086420  | -1.07578272 | -0.57749033 | H | 2.26768819  | 7.34151351  | -0.46362936 |
| Cl | -0.08820427 | 0.50862982  | -2.37113176 | H | 2.73456542  | 6.98913924  | -2.15203198 |
| Cl | 0.26744516  | 0.07892178  | 2.43479601  | H | 1.02927130  | 6.89316562  | -1.65970036 |
| C  | 2.60294225  | -2.47816541 | 0.10231865  | C | -0.34095850 | -1.81525315 | 0.13497159  |
| C  | 2.54398882  | -3.28337170 | 1.26637319  | H | -0.22455702 | -2.21254942 | 1.16694103  |
| C  | 2.55823908  | -3.05112636 | -1.19628957 | C | -0.82453977 | -2.87034483 | -0.77268176 |
| C  | 2.39061469  | -4.67534023 | 1.10132809  | C | -0.85329354 | -2.79044070 | -2.18964189 |
| C  | 2.41239778  | -4.44511377 | -1.30343408 | C | -1.27690183 | -4.07558592 | -0.16493572 |
| C  | 2.32205787  | -5.27553429 | -0.16861534 | C | -1.32105713 | -3.86492096 | -2.95714898 |
| H  | 2.33083752  | -5.30615588 | 1.99717706  | H | -0.49634351 | -1.87438620 | -2.67078290 |
| H  | 2.36504860  | -4.89326578 | -2.30363664 | C | -1.76620437 | -5.14106786 | -0.93356433 |
| C  | 2.54371209  | 2.48747926  | -0.32414195 | H | -1.23958557 | -4.16156651 | 0.92714564  |
| C  | 2.30964225  | 3.42694293  | 0.71249928  | C | -1.78757220 | -5.04009721 | -2.33619069 |
| C  | 2.69538020  | 2.90753741  | -1.67374108 | H | -1.32706212 | -3.78556112 | -4.04993926 |
| C  | 2.15010199  | 4.78253363  | 0.35637179  | H | -2.12293700 | -6.05185021 | -0.44001315 |
| C  | 2.52379983  | 4.27177626  | -1.97199635 | H | -2.16234361 | -5.87208146 | -2.94271353 |
| C  | 2.24540808  | 5.22636341  | -0.97470529 | H | -4.99827478 | 0.77110792  | 4.05785994  |
| H  | 1.96726007  | 5.51380520  | 1.15384896  | C | -3.92700779 | 0.65426349  | 4.32420650  |
| H  | 2.63589640  | 4.59867143  | -3.01331583 | C | -3.66034273 | -0.81324073 | 4.70831858  |
| C  | 2.66679052  | -2.19160883 | -2.43480992 | C | -3.05079775 | 1.10729426  | 3.13411266  |
| H  | 3.62802877  | -1.64659247 | -2.47153066 | H | -3.74525094 | 1.31931132  | 5.18928905  |
| H  | 2.60112019  | -2.81057793 | -3.34401810 | C | -3.85687878 | -1.74155039 | 3.49467833  |
| H  | 1.86761752  | -1.42976353 | -2.47363671 | H | -2.61885496 | -0.90976837 | 5.07355632  |
| C  | 2.65545318  | -2.68356008 | 2.64992887  | H | -4.32139022 | -1.11964184 | 5.54070225  |
|    |             |             |             | C | -3.26361229 | 0.17546649  | 1.91811009  |
|    |             |             |             | H | -1.98613464 | 1.09102428  | 3.42678110  |
|    |             |             |             | H | -3.31068855 | 2.14914628  | 2.87428586  |

|   |             |             |             |    |             |             |             |
|---|-------------|-------------|-------------|----|-------------|-------------|-------------|
| C | -2.98420980 | -1.29731584 | 2.30113387  | Ru | 0.09862700  | -0.33655800 | 0.08199500  |
| H | -4.92598458 | -1.73412771 | 3.19715603  | C  | 1.79566100  | 0.37566100  | 0.29893500  |
| H | -3.61334283 | -2.78657349 | 3.76404493  | H  | 2.14529300  | 0.34016400  | 1.35368300  |
| P | -2.40028623 | 0.64441770  | 0.27436154  | C  | 2.79939000  | 1.04569700  | -0.54711300 |
| H | -4.33923731 | 0.24634375  | 1.65768496  | Cl | -0.18537200 | -0.36916900 | -2.33044400 |
| H | -1.91599991 | -1.39047660 | 2.56555905  | Cl | -0.11226100 | -0.41304100 | 2.51714500  |
| H | -3.16447959 | -1.96802853 | 1.44000954  | C  | 0.55405600  | -2.34527100 | 0.20459000  |
| C | -2.56570899 | 2.52724988  | 0.18112703  | P  | -1.15824000 | 1.79551600  | 0.15500500  |
| C | -3.77010832 | -0.05450680 | -0.86900929 | N  | -0.37006700 | -3.36027900 | 0.21191100  |
| C | -2.56380340 | 3.09025464  | -1.26205971 | N  | 1.76568100  | -2.91402100 | 0.50679800  |
| C | -1.44718628 | 3.22849722  | 0.99183492  | C  | 1.70215900  | -4.39330600 | 0.63094800  |
| H | -3.54567473 | 2.76366080  | 0.64811418  | H  | 2.21654800  | -4.72468900 | 1.54816700  |
| C | -3.39292680 | -0.28079038 | -2.34884460 | H  | 2.20624000  | -4.86414100 | -0.23537200 |
| C | -5.13566785 | 0.68076578  | -0.78443449 | C  | 0.19297500  | -4.66018100 | 0.65726600  |
| H | -3.91026494 | -1.06237521 | -0.42163651 | H  | -0.12142200 | -5.46623500 | -0.02732600 |
| C | -2.78642090 | 4.61837278  | -1.25238792 | H  | -0.17433300 | -4.90115500 | 1.67203800  |
| H | -1.59617043 | 2.84842126  | -1.74070578 | C  | 3.08472800  | -2.34487800 | 0.43173000  |
| H | -3.34263103 | 2.61220912  | -1.87836635 | C  | 3.71764600  | -2.23441100 | -0.83437300 |
| C | -1.67101187 | 4.75420459  | 1.02893092  | C  | 5.06141600  | -1.82272900 | -0.87119900 |
| H | -0.47505826 | 3.02035163  | 0.50117346  | H  | 5.55540800  | -1.72768600 | -1.84612200 |
| H | -1.36721344 | 2.82489031  | 2.01345817  | C  | 5.78448200  | -1.52914400 | 0.30198800  |
| C | -4.49111367 | -1.08395754 | -3.07810412 | C  | 5.12684700  | -1.65742100 | 1.53893100  |
| H | -3.24837888 | 0.68971800  | -2.85829935 | H  | 5.67500300  | -1.43630100 | 2.46355900  |
| H | -2.42774716 | -0.79975328 | -2.41744127 | C  | 3.78291100  | -2.07236400 | 1.63383900  |
| C | -6.23887574 | -0.12325035 | -1.50932174 | C  | 2.97089000  | -2.54331600 | -2.11142000 |
| H | -5.05003792 | 1.67542019  | -1.26100001 | H  | 3.62876100  | -2.41746100 | -2.98621000 |
| H | -5.44542907 | 0.86147982  | 0.26032211  | H  | 2.09436800  | -1.88211300 | -2.23705300 |
| C | -1.73646906 | 5.34581353  | -0.39187163 | H  | 2.59060000  | -3.58123600 | -2.12507700 |
| H | -3.80050318 | 4.83658989  | -0.85837080 | C  | 7.22779300  | -1.07653100 | 0.22508800  |
| H | -2.76463769 | 5.00106041  | -2.29003677 | H  | 7.30123600  | -0.06552000 | -0.21602500 |
| H | -2.61661977 | 4.97138526  | 1.56725369  | H  | 7.82880100  | -1.75136600 | -0.40985800 |
| H | -0.86201197 | 5.23544577  | 1.60918073  | H  | 7.69457900  | -1.04298400 | 1.22346700  |
| C | -5.86681937 | -0.39901343 | -2.97842454 | C  | 3.11775800  | -2.22510000 | 2.98352200  |
| H | -4.55285448 | -2.09877809 | -2.63534334 | H  | 2.13450900  | -1.72195900 | 3.00995600  |
| H | -4.20527363 | -1.22177842 | -4.13762867 | H  | 3.75363800  | -1.80288000 | 3.77890100  |
| H | -6.38964079 | -1.08695094 | -0.98191683 | H  | 2.94470100  | -3.28907900 | 3.23434500  |
| H | -7.19855765 | 0.42383094  | -1.44706689 | C  | -1.76992800 | -3.33803400 | -0.13523400 |
| H | -0.74201820 | 5.23296675  | -0.86610861 | C  | -2.12928100 | -3.57144000 | -1.49005500 |
| H | -1.95397843 | 6.42987200  | -0.35176196 | C  | -3.49597200 | -3.69141800 | -1.80716600 |
| H | -5.83645062 | 0.56163821  | -3.53167027 | H  | -3.77835900 | -3.86484300 | -2.85300200 |
| H | -6.64639051 | -1.01655421 | -3.46271427 | C  | -4.49977000 | -3.63338800 | -0.82258100 |
|   |             |             |             | C  | -4.10397700 | -3.45455500 | 0.51627500  |
|   |             |             |             | H  | -4.86727100 | -3.44311500 | 1.30479800  |

**Pseudo Z- 2b-PC**



|                                                         |             |             |             |    |             |             |             |
|---------------------------------------------------------|-------------|-------------|-------------|----|-------------|-------------|-------------|
| C                                                       | -5.51241700 | -1.01817800 | -0.26306500 | Cl | 1.04243600  | -1.84339100 | 2.06756500  |
| C                                                       | -4.11456300 | -0.94971900 | -0.25245600 | Cl | 0.96038500  | -1.63038800 | -2.35187200 |
| H                                                       | -7.37429700 | 0.01209800  | 0.18551100  | P  | -0.91908600 | 0.06272500  | 0.01762300  |
| H                                                       | -6.23288300 | 2.07482800  | 1.03462400  | C  | 2.18718200  | 0.40306000  | -0.05810000 |
| H                                                       | -3.74053700 | 2.20262800  | 1.05818900  | H  | 1.85113700  | 1.45486600  | -0.07634100 |
| H                                                       | -3.52209500 | -1.81413600 | -0.57423700 | C  | -1.16718200 | 1.04472700  | 1.62021900  |
| H                                                       | -6.00820600 | -1.92702400 | -0.61993600 | H  | -1.17322700 | 0.22019800  | 2.36251700  |
| C                                                       | 1.07978800  | 1.93572100  | 0.22615700  | C  | 0.00871500  | 1.96657400  | 2.02313000  |
| C                                                       | 1.66821600  | 2.56592500  | 1.34540700  | H  | 0.10978600  | 2.79861600  | 1.29898000  |
| C                                                       | 0.55061500  | 2.72898400  | -0.81734100 | H  | 0.95087600  | 1.39442500  | 2.00414600  |
| C                                                       | 1.73493900  | 3.96844300  | 1.41290200  | C  | -0.21273000 | 2.54873800  | 3.43615000  |
| H                                                       | 2.07397700  | 1.96550800  | 2.16498300  | H  | -0.18217300 | 1.72085000  | 4.17224700  |
| C                                                       | 0.62708700  | 4.12964000  | -0.74582400 | H  | 0.62355900  | 3.22538400  | 3.69152800  |
| H                                                       | 0.07810900  | 2.24717000  | -1.68096300 | C  | -1.55906600 | 3.28701100  | 3.55342100  |
| C                                                       | 1.21713800  | 4.75261300  | 0.36816200  | H  | -1.71000900 | 3.65235700  | 4.58595100  |
| H                                                       | 2.19051700  | 4.44577000  | 2.28712600  | H  | -1.54520400 | 4.18415800  | 2.90129900  |
| H                                                       | 0.21614100  | 4.73338500  | -1.56196800 | C  | -2.72673400 | 2.37493000  | 3.13398100  |
| H                                                       | 1.26758700  | 5.84531100  | 0.42458300  | H  | -2.81483000 | 1.53681900  | 3.85415100  |
| C                                                       | 1.46455300  | -0.50161000 | 1.78368000  | H  | -3.68494000 | 2.92585600  | 3.17198200  |
| C                                                       | 2.81604400  | -0.70583100 | 2.13834000  | C  | -2.51628400 | 1.79896500  | 1.71556900  |
| C                                                       | 0.45643300  | -0.70995600 | 2.74847400  | H  | -2.52601500 | 2.63185100  | 0.98605500  |
| C                                                       | 3.15193400  | -1.10372600 | 3.44402200  | H  | -3.36162000 | 1.13664800  | 1.45599200  |
| H                                                       | 3.60660600  | -0.56022400 | 1.39507800  | C  | -1.28862700 | 1.13290400  | -1.51564200 |
| C                                                       | 0.79680600  | -1.10154200 | 4.05299000  | H  | -0.89941100 | 0.47699000  | -2.32063300 |
| H                                                       | -0.59536300 | -0.59070200 | 2.46983400  | C  | -0.46676600 | 2.44515000  | -1.55371300 |
| C                                                       | 2.14406300  | -1.29894400 | 4.40363800  | H  | -0.81438600 | 3.12279000  | -0.74915500 |
| H                                                       | 4.20292300  | -1.26461100 | 3.70712500  | H  | 0.60092400  | 2.24041600  | -1.36906700 |
| H                                                       | 0.00552400  | -1.26849200 | 4.79130000  | C  | -0.61648500 | 3.16347400  | -2.91258300 |
| H                                                       | 2.40664300  | -1.61426200 | 5.41911200  | H  | -0.17658300 | 2.52682800  | -3.70548500 |
| C                                                       | 2.43573400  | -0.40649000 | -0.96549800 | H  | -0.03244000 | 4.10250500  | -2.90085600 |
| C                                                       | 2.63722800  | -1.78674100 | -1.19928600 | C  | -2.09236300 | 3.44881000  | -3.24309500 |
| C                                                       | 3.29555600  | 0.53592300  | -1.56593200 | H  | -2.18161500 | 3.91964600  | -4.23939100 |
| C                                                       | 3.69472600  | -2.21343800 | -2.01677000 | H  | -2.49762800 | 4.17809800  | -2.51226500 |
| H                                                       | 1.96454400  | -2.52326100 | -0.74391700 | C  | -2.92378300 | 2.15480600  | -3.18535100 |
| C                                                       | 4.35096000  | 0.10088600  | -2.38657900 | H  | -3.99209500 | 2.36996300  | -3.37392100 |
| H                                                       | 3.14296800  | 1.60612300  | -1.39598000 | H  | -2.59220100 | 1.47031500  | -3.99150400 |
| C                                                       | 4.55245900  | -1.27094700 | -2.61296400 | C  | -2.77950200 | 1.43455800  | -1.82446700 |
| H                                                       | 3.84396000  | -3.28381700 | -2.19329800 | H  | -3.37621700 | 0.50711600  | -1.84928700 |
| H                                                       | 5.01391200  | 0.83882200  | -2.85075100 | H  | -3.21109400 | 2.07356500  | -1.03117200 |
| H                                                       | 5.37297200  | -1.60596200 | -3.25633700 | C  | -2.37650300 | -1.15835100 | 0.04581300  |
|                                                         |             |             |             | H  | -3.27152700 | -0.50619500 | -0.03280800 |
|                                                         |             |             |             | C  | -2.51471300 | -1.97727900 | 1.35195700  |
|                                                         |             |             |             | H  | -2.57314400 | -1.31257600 | 2.23173600  |
| <b>1b-Inact-C PCy<sub>3</sub>-Cl<sub>2</sub>Ru=CHPh</b> |             |             |             |    |             |             |             |
| Ru                                                      | 1.02854300  | -1.03139000 | -0.10985300 |    |             |             |             |

|   |             |             |             |   |             |             |             |
|---|-------------|-------------|-------------|---|-------------|-------------|-------------|
| H | -1.61500900 | -2.60306300 | 1.49628900  | C | -4.61959800 | -2.27178500 | -0.10346200 |
| C | -3.77512000 | -2.87018900 | 1.30926300  | H | -4.50302200 | -2.37189600 | 2.05978600  |
| H | -3.83398400 | -3.46338200 | 2.24047600  | H | -4.38559300 | -2.11238500 | -2.25365200 |
| H | -4.67875600 | -2.22688600 | 1.28873400  | C | 3.02775100  | -0.84739900 | -0.03706200 |
| C | -3.78564500 | -3.79537700 | 0.07845200  | C | 3.64368800  | -0.53693300 | 1.20293300  |
| H | -2.95092900 | -4.52007800 | 0.15871200  | C | 3.68584200  | -0.58337800 | -1.26922800 |
| H | -4.71797400 | -4.38933600 | 0.05184200  | C | 4.86642400  | 0.16368100  | 1.17909700  |
| C | -3.62660600 | -2.98424700 | -1.22089900 | C | 4.91010400  | 0.10749100  | -1.23421400 |
| H | -4.51987800 | -2.34191800 | -1.36472400 | C | 5.50378000  | 0.51563800  | -0.02348100 |
| H | -3.57950700 | -3.65769400 | -2.09641700 | H | 5.33512300  | 0.43012200  | 2.13467100  |
| C | -2.36188800 | -2.10183000 | -1.18227700 | H | 5.41620100  | 0.32794300  | -2.18219400 |
| H | -1.46492100 | -2.74726500 | -1.13403700 | C | -1.68368400 | -1.88356300 | -2.56007900 |
| H | -2.26534900 | -1.53396200 | -2.12418800 | H | -0.98158000 | -2.71770600 | -2.74035200 |
| C | 6.46971100  | 0.01456800  | -0.10488100 | H | -2.36696500 | -1.83308800 | -3.42281400 |
| C | 5.86030300  | 1.26599000  | -0.30954500 | H | -1.08407300 | -0.95630000 | -2.53994900 |
| C | 4.46389500  | 1.37909800  | -0.28153800 | C | -1.81268900 | -2.20192800 | 2.52847200  |
| C | 3.64133300  | 0.24090800  | -0.05439700 | H | -2.53325300 | -2.27546400 | 3.35872500  |
| C | 4.27794900  | -1.01330700 | 0.16094300  | H | -1.10562200 | -3.04638600 | 2.62013100  |
| C | 5.67249100  | -1.12243700 | 0.13324400  | H | -1.22461700 | -1.27633900 | 2.65961400  |
| H | 7.56101300  | -0.07473800 | -0.12367700 | C | 3.08578600  | -1.00664500 | 2.52918100  |
| H | 6.47563100  | 2.15422200  | -0.48893500 | H | 1.99572000  | -1.14474100 | 2.50336100  |
| H | 3.98960300  | 2.35442200  | -0.44160600 | H | 3.55810000  | -1.96458000 | 2.82209300  |
| H | 3.66891900  | -1.89920700 | 0.37642700  | H | 3.30105200  | -0.27580400 | 3.32484300  |
| H | 6.14418000  | -2.09562300 | 0.30490000  | C | 3.11752000  | -1.05922400 | -2.58701000 |

**2b-Inact-C PCy<sub>3</sub>-Cl<sub>2</sub>Ru=CHPh**

|    |             |             |             |   |             |             |             |
|----|-------------|-------------|-------------|---|-------------|-------------|-------------|
| Ru | 0.25070700  | 0.87829500  | 0.06174100  | H | 3.83943400  | -0.88748100 | -3.40188200 |
| C  | 0.50752500  | -1.03030400 | -0.00508800 | H | 2.88383300  | -2.13891400 | -2.56222800 |
| N  | 1.78174900  | -1.57418700 | -0.06844400 | C | -6.12756500 | -2.40901900 | -0.15413500 |
| N  | -0.36966100 | -2.09525300 | 0.03839400  | H | -6.42361600 | -3.46792600 | -0.27479100 |
| C  | 1.78590300  | -3.03830700 | 0.12619100  | H | -6.59910700 | -2.04107800 | 0.77242300  |
| H  | 2.10783600  | -3.28799500 | 1.15641100  | H | -6.55696000 | -1.85177800 | -1.00375000 |
| H  | 2.48037700  | -3.52175400 | -0.58117700 | C | 6.79228200  | 1.31119200  | -0.02052700 |
| C  | 0.31597200  | -3.39945800 | -0.12782100 | H | 7.35909200  | 1.16167200  | 0.91366200  |
| H  | -0.08199900 | -4.13562400 | 0.59038600  | H | 7.44211300  | 1.03233100  | -0.86737400 |
| H  | 0.15052500  | -3.78903600 | -1.15158500 | H | 6.58516700  | 2.39392900  | -0.11024700 |
| Cl | 0.76574500  | 1.46447400  | -2.13102500 | C | -1.58658400 | 1.04547400  | 0.01632500  |
| Cl | 0.64323600  | 1.27258600  | 2.31855800  | H | -2.25403300 | 0.16992200  | 0.02920700  |
| C  | -1.80531200 | -2.09654000 | -0.01738000 | C | -2.27640000 | 2.33262700  | 0.00329800  |
| C  | -2.52799200 | -2.21049600 | 1.19520300  | C | -1.59834200 | 3.58034700  | -0.08857100 |
| C  | -2.46056300 | -2.06218700 | -1.27393300 | C | -3.69685500 | 2.34590600  | 0.09062000  |
| C  | -3.93246400 | -2.29254800 | 1.12606800  | C | -2.31132500 | 4.78387900  | -0.08735600 |
| C  | -3.86596200 | -2.14833000 | -1.28795300 | H | -0.50585400 | 3.60119100  | -0.17533600 |
|    |             |             |             | C | -4.40760300 | 3.55312500  | 0.09244200  |

|   |             |            |             |
|---|-------------|------------|-------------|
| H | -4.23030400 | 1.39098100 | 0.16035200  |
| C | -3.71739200 | 4.77613500 | 0.00391000  |
| H | -1.77261400 | 5.73430700 | -0.16154300 |
| H | -5.50080800 | 3.54307000 | 0.16115300  |
| H | -4.27168900 | 5.72074800 | 0.00290300  |

**PPh<sub>3</sub>**

|   |             |             |             |
|---|-------------|-------------|-------------|
| C | -1.14690900 | -1.21998600 | -0.41344300 |
| C | 1.62980900  | -0.38472500 | -0.40557800 |
| C | -0.47961100 | 1.59710000  | -0.40834300 |
| C | -0.80447800 | -2.02649700 | 0.69320300  |
| C | -2.43147200 | -1.36584600 | -0.98741100 |
| C | 2.10625300  | 0.25716700  | 0.75865300  |
| C | 2.44960800  | -1.35372400 | -1.02925400 |
| C | 0.00395700  | 2.78759300  | -0.99918000 |
| C | -1.32045500 | 1.69462900  | 0.72133200  |
| C | -1.72839900 | -2.94712300 | 1.21901600  |
| H | 0.18882800  | -1.93699200 | 1.14515000  |
| C | -3.35876000 | -2.27378900 | -0.45251100 |
| H | -2.70452500 | -0.76306600 | -1.86187300 |
| C | 3.36538200  | -0.07133000 | 1.29098600  |
| H | 1.49422400  | 1.02151500  | 1.24909000  |
| C | 3.70107900  | -1.69138800 | -0.48928000 |
| H | 2.10386600  | -1.84361000 | -1.94731500 |
| C | -0.32431400 | 4.04174900  | -0.46057700 |
| H | 0.64102600  | 2.72864200  | -1.88975300 |
| C | -1.66180700 | 2.95167600  | 1.25103600  |
| H | -1.71355600 | 0.78430200  | 1.18579200  |
| C | -3.00797700 | -3.07036900 | 0.65223000  |
| H | -1.44554900 | -3.56728000 | 2.07678100  |
| H | -4.35100100 | -2.36858800 | -0.90677900 |
| C | 4.16372700  | -1.04832400 | 0.67244800  |
| H | 3.72145700  | 0.43867500  | 2.19289400  |
| H | 4.32054900  | -2.44751900 | -0.98362500 |
| C | -1.16205800 | 4.12725300  | 0.66569600  |
| H | 0.06344700  | 4.95295100  | -0.92880300 |
| H | -2.31843600 | 3.01001800  | 2.12613400  |
| H | -3.72601000 | -3.78754500 | 1.06393900  |
| H | 5.14454300  | -1.30201800 | 1.08850000  |

|   |             |             |             |
|---|-------------|-------------|-------------|
| H | -1.42921700 | 5.10524300  | 1.07992500  |
| P | 0.00326000  | -0.00327500 | -1.22428000 |

**PCy<sub>3</sub>**

|   |             |             |             |
|---|-------------|-------------|-------------|
| P | -0.23449800 | -0.06733500 | -1.04758700 |
| C | 0.75610100  | -1.51045200 | -0.29683600 |
| H | 0.01674100  | -2.33724800 | -0.36756500 |
| C | 1.22469400  | -1.44237600 | 1.17386200  |
| H | 0.38729000  | -1.17136500 | 1.84327100  |
| H | 1.98523100  | -0.64397800 | 1.27627000  |
| C | 1.85378900  | -2.78047800 | 1.62427800  |
| H | 2.20023800  | -2.70274400 | 2.67215700  |
| H | 1.07639300  | -3.57124200 | 1.60746700  |
| C | 3.01771000  | -3.19303900 | 0.70252100  |
| H | 3.42877100  | -4.17073200 | 1.01605500  |
| H | 3.84117400  | -2.45760700 | 0.80839600  |
| C | 2.57285300  | -3.24515900 | -0.77210000 |
| H | 3.43095400  | -3.49246300 | -1.42493500 |
| H | 1.83426600  | -4.06259600 | -0.90041500 |
| C | 1.93264000  | -1.91462000 | -1.22197600 |
| H | 1.57989400  | -1.99059800 | -2.26675600 |
| H | 2.70554900  | -1.12142900 | -1.20951600 |
| C | -1.84477800 | -0.12333000 | -0.03257900 |
| H | -1.61473700 | -0.07699600 | 1.05287600  |
| C | -2.60999700 | -1.44137000 | -0.31061900 |
| H | -2.00888800 | -2.31502900 | -0.00006100 |
| H | -2.76475100 | -1.54075000 | -1.40452500 |
| C | -3.97683300 | -1.48806800 | 0.40459200  |
| H | -4.49739600 | -2.43128600 | 0.15348300  |
| H | -3.81419600 | -1.50119200 | 1.50155100  |
| C | -4.85095600 | -0.27532800 | 0.03702600  |
| H | -5.10726300 | -0.32422000 | -1.04068300 |
| H | -5.80786500 | -0.30547800 | 0.59066600  |
| C | -4.10642900 | 1.04181700  | 0.32043400  |
| H | -3.94948000 | 1.14421400  | 1.41355800  |
| H | -4.72022500 | 1.90819800  | 0.00992500  |
| C | -2.73966500 | 1.08836600  | -0.39614900 |
| H | -2.22854400 | 2.03754600  | -0.15354100 |
| H | -2.90284100 | 1.09300900  | -1.49346800 |
| C | 0.55255200  | 1.57071900  | -0.46999600 |
| H | -0.07257800 | 2.30819000  | -1.01979300 |
| C | 0.52302600  | 1.98333500  | 1.02160400  |

|   |             |            |             |
|---|-------------|------------|-------------|
| H | 1.13987100  | 1.28682400 | 1.61874700  |
| H | -0.50287700 | 1.91889900 | 1.42710200  |
| C | 1.06619400  | 3.41899600 | 1.20819700  |
| H | 0.38715200  | 4.13301300 | 0.69899800  |
| H | 1.05681500  | 3.68869300 | 2.28114100  |
| C | 2.48617900  | 3.57060600 | 0.62900400  |
| H | 2.83773600  | 4.61323100 | 0.74044900  |
| H | 3.18536200  | 2.93867200 | 1.21370300  |
| C | 2.53495500  | 3.14076800 | -0.84983300 |
| H | 3.56970400  | 3.20298600 | -1.23590300 |
| H | 1.92931600  | 3.84479700 | -1.45567800 |
| C | 1.98504700  | 1.71196800 | -1.03963600 |
| H | 1.99840300  | 1.43482600 | -2.11036300 |
| H | 2.65575100  | 0.99973500 | -0.51955700 |
